# Supplementary material for: Discovery and optimization of pyrrolopyrimidines as highly potent, selective and brain-penetrant LRRK2 inhibitors
Source: Royal Society of Chemistry journal article supplement (doi:10.1039/d5md00856e), 2025-11-17
Supplement: d5md00856e1.pdf [file d5md00856e1.pdf]

## Discovery and Optimization of Pyrrolopyrimidines as Highly Potent, Selective and Brain-Penetrant LRRK2 Inhibitors

Jeffrey M. Axten<sup>a,\*</sup>, Xiao Ding<sup>b</sup>, Luigi Piero Stasi<sup>b</sup>, Baowei Zhao<sup>b</sup>, Yingxia Sang<sup>b</sup>, Ming-Hsun Ho<sup>a</sup>, Lizhen Wang<sup>b</sup>, Minhua Zhang<sup>b</sup>, Xianjun Guo<sup>b</sup>, Chengfang Tan<sup>b</sup>, Xu Feng<sup>b</sup>, Colin Edge<sup>c</sup>, Klara Valko<sup>c</sup>, Yi Li<sup>b</sup>, Kelly Dong<sup>b</sup>, Xiaoming Guan<sup>b</sup>, Nico Zinn<sup>d</sup>, F. David Tattersall<sup>a</sup>, Feng Ren<sup>b</sup>, Dai-Shi Su<sup>a</sup>, Alastair D. Reith<sup>c</sup>

GSK Research and Development, <sup>a</sup>1250 S. Collegeville Road, Collegeville, Pennsylvania, 19426, USA, <sup>b</sup>898 Halei Road, Zhangjiang Hi-Tech Park, Pudong, Shanghai 201203, PR China, <sup>c</sup>Medicines Research Centre, Gunnels Wood Road, Stevenage, SG1 2NY, UK, <sup>d</sup>Omics Technologies, Cellzome a GSK company, Meyerhofstrasse 1, D-69117 Heidelberg, Germany

### Table of Contents

|                                                                                |    |
|--------------------------------------------------------------------------------|----|
| Synthetic procedures and characterization data for compounds <b>3-42</b> ..... | 2  |
| Cellular LRRK2 pS935 AlphaScreen Assay .....                                   | 57 |
| P-gp/Bcrp Permeability Ratio (ER) and Cell Permeability Assay .....            | 57 |
| Animal studies .....                                                           | 58 |
| Pharmacokinetics and tissue distribution .....                                 | 58 |
| Rat pharmacodynamic studies .....                                              | 58 |
| Mouse pharmacodynamic studies .....                                            | 59 |
| Tissue lysis.....                                                              | 59 |
| Protein concentration determination in tissue samples.....                     | 59 |
| Determination of pS935 LRRK2 levels in tissue samples.....                     | 60 |
| Supplemental Figure S1 Total LRRK2 pharmacodynamics in rats .....              | 61 |
| Supplemental Figure S2 Total LRRK2 pharmacodynamics in mice .....              | 61 |
| Kinase selectivity determination of <b>39</b> and <b>40</b> .....              | 62 |
| Supplemental Figure S3 Selectivity profiles of <b>39</b> and <b>40</b> .....   | 62 |
| Supplemental Table S1 Individual kinase data for <b>39</b> .....               | 63 |
| Supplemental Table S2 Individual kinase data for <b>40</b> .....               | 81 |
| References .....                                                               | 99 |

## Synthetic procedures and characterization data for compounds 3-42

### General methods

All reagents used were purchased from commercial suppliers and used without further purification.  $^1\text{H}$  NMR,  $^{19}\text{F}$  NMR and  $^{13}\text{C}$  NMR spectra were recorded on a Bruker 400 or 600 NMR spectrometer using  $\text{CDCl}_3$  (deuteriochloroform),  $\text{CD}_3\text{OD}$  (deuterated methanol), or  $\text{DMSO}-d_6$  (hexadeuterio-dimethyl sulfoxide) as the solvents and TMS (tetramethylsilane) as the internal standard. Chemical shifts ( $\delta$ ) are given in parts per million (ppm) downfield from the TMS signal. The following abbreviations are used to indicate the multiplicity in NMR spectra: s = singlet, d = doublet, t = triplet, q = quartet, m = multiplet, dd = doublet of doublets, dt = doublet of triplets, app = apparent, br = broad.  $J$  indicates the NMR coupling constant measured in Hertz. High resolution mass (HRMS) was operated in a positive mode of electrospray ionization (ESI) at an orthogonal acceleration time-of-flight (oa-TOF) SYNAPT G2 HDMSTM (Waters, Manchester, UK). LCMS analysis was conducted for all compounds under the following conditions: 1) Acidic conditions: mobile phase: water containing 0.05 % TFA /  $\text{CH}_3\text{CN}$ , column: Agilent SB-C18 4.6 x 30 mm-1.8 microns, detection: MS and photodiode array detector (PDA); 2) Basic conditions: mobile phase: water containing 10 mmol  $\text{NH}_4\text{HCO}_3$  /  $\text{CH}_3\text{CN}$ , Column: XBridge<sup>TM</sup> C18 4.6x50 mm-3.5 microns, detection: MS and photodiode array detector (PDA); 3) Basic conditions: mobile phase: water containing 0.02%  $\text{NH}_4\text{OAc}$  /  $\text{CH}_3\text{CN}$ , column: Welch Ultimate XB-C18 5 $\mu\text{m}$  4.6x33mm, detection: MS and photodiode array detector (PDA). Column chromatography was performed on Isco or Biotage using a pre-packed silica gel column, a detector with UV wavelength at 254 nm and 280 nm. Prep-HPLC was performed on Waters instrument using Column: Xbridge Prep C18 column OBD (10  $\mu\text{m}$ , 19 x 250 mm) and water containing 0.08% ammonia/ acetonitrile as the mobile phase.

### Abbreviations:

ACN: Acetonitrile

$\text{Boc}_2\text{O}$ : Di-tert-butyl decarbonate

$n\text{-BuLi}$ :  $n$ -Butyl lithium

$\text{CbzCl}$ : Benzyl chloroformate

DAST: Diethylamino sulfur trifluoride

dba: dibenzylideneacetone

DBU: 1,8-Diazabicyclo[5.4.0]undec-7-ene

DCE: 1,2-Dichloroethane

DCM: Dichloromethane

DEA: Diethylamine

DIAD: Diisopropyl azodicarboxylate  
 DIPEA: *N,N*-Diisopropylethylamine  
 DMA: *N,N*-Dimethylacetamide  
 DMF: Dimethylformamide  
 DMAP: 4-Dimethylaminopyridine  
 DMSO: Dimethylsulfoxide  
 dppf: 1,1'-Bis(diphenylphosphino)ferrocene  
 EA: Ethyl acetate  
 Et: Ethyl  
 Et<sub>2</sub>O: Diethyl ether  
 EtOAc: Ethyl acetate  
 LDA: Lithium diisopropylamide  
 LHMDs (or LiHMDs): Lithium bis(trimethylsilyl)amide  
 Me: Methyl  
 MsCl: Methanesulfonyl chloride  
 NIS: *N*-Iodosuccinimide  
 HOAc: Acetic acid  
 SEMCl: (2-(Chloromethoxy)ethyl)trimethylsilane  
 TBAF: Tetrabutylammonium fluoride  
 TEA: Triethylamine  
 TFA: Trifluoroacetic acid  
 PE: Petroleum ether  
 X-Phos: 4,5-Bis(diphenylphosphino)-9,9-dimethylxanthene

**Synthesis of 4-ethoxy-*N*-(3-methyl-1-(tetrahydro-2*H*-pyran-4-yl)-1*H*-pyrazol-4-yl)-7*H*-pyrrolo-[2,3-*d*]-pyrimidin-2-amine (2) and 4-ethoxy-*N*-(5-methyl-1-(tetrahydro-2*H*-pyran-4-yl)-1*H*-pyrazol-4-yl)-7*H*-pyrrolo-[2,3-*d*]-pyrimidin-2-amine (3)**

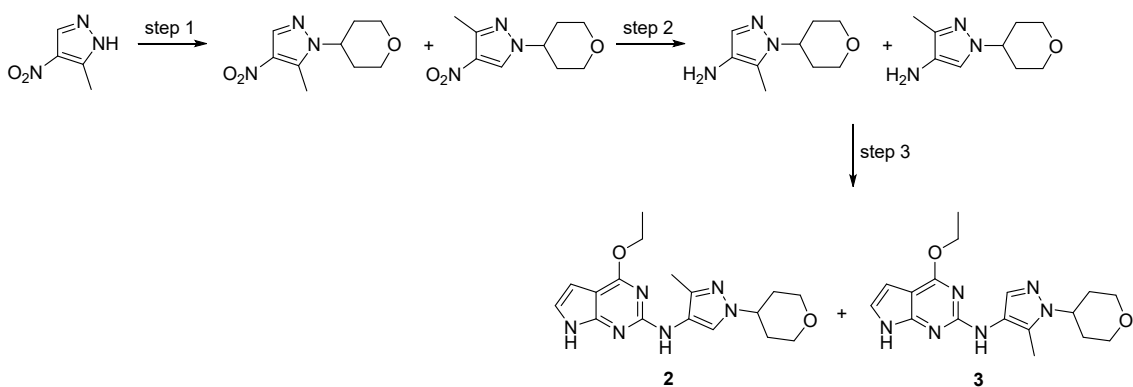

**Step 1:** *5-methyl-4-nitro-1-(tetrahydro-2H-pyran-4-yl)-1H-pyrazole and 3-methyl-4-nitro-1-(tetrahydro-2H-pyran-4-yl)-1H-pyrazole*. To a solution of 5-methyl-4-nitro-1H-pyrazole (800 mg, 6.29 mmol) and NaH (252 mg, 6.29 mmol) in DMF (5 mL) stirred at room temperature was added tetrahydro-2H-pyran-4-yl methanesulfonate (1475 mg, 8.18 mmol). The reaction was stirred overnight at 100 °C. The mixture was partitioned between ethyl acetate (10 mL) and water (25 mL). The organic phase was washed with satur. NaHCO<sub>3</sub> solution (10 mL), brine (10 mL), dried over Na<sub>2</sub>SO<sub>4</sub> and concentrated to give the mixture of title compounds as brown oil (600 mg). LCMS: 212 [M+H]<sup>+</sup>.

**Step 2:** *5-methyl-1-(tetrahydro-2H-pyran-4-yl)-1H-pyrazol-4-amine and 3-methyl-1-(tetrahydro-2H-pyran-4-yl)-1H-pyrazol-4-amine*. The mixture of 3-methyl-4-nitro-1-(tetrahydro-2H-pyran-4-yl)-1H-pyrazole, 5-methyl-4-nitro-1-(tetrahydro-2H-pyran-4-yl)-1H-pyrazole (470 mg, 2.225 mmol) and iron (1243 mg, 22.25 mmol) in ethanol (20 mL) and water (20.00 mL) was stirred overnight at 20 °C. The mixture was filtered and the filtrate concentrated. The crude was purified by column chromatography on silica gel (DCM: MeOH=10:1) to give the title compounds (180 mg, 44.6 % yield) as oil. LCMS: 182 [M+H]<sup>+</sup>.

**Step 3:** *4-ethoxy-N-(3-methyl-1-(tetrahydro-2H-pyran-4-yl)-1H-pyrazol-4-yl)-7H-pyrrolo-[2,3-d]-pyrimidin-2-amine (2) and 4-ethoxy-N-(5-methyl-1-(tetrahydro-2H-pyran-4-yl)-1H-pyrazol-4-yl)-7H-pyrrolo-[2,3-d]-pyrimidin-2-amine (3)*. A solution of **52** (90 mg, 0.455 mmol), a mixture of 5-methyl-1-(tetrahydro-2H-pyran-4-yl)-1H-pyrazol-4-amine and 3-methyl-1-(tetrahydro-2H-pyran-4-yl)-1H-pyrazol-4-amine (41.3 mg, 0.228 mmol), Pd<sub>2</sub>(dba)<sub>3</sub> (41.7 mg, 0.046 mmol), (9,9-dimethyl-9H-xanthene-4,5-diyl)bis-(diphenylphosphine) and potassium carbonate (189 mg, 1.366 mmol) in 2-butanol (3.0 mL) was irradiated by microwave at 120 °C for 45 min. The reaction mixture was quenched with water, partitioned between ethyl acetate (25 mL) and water (5 mL). The organic layer was washed with water, and then saturated NaHCO<sub>3</sub> solution. The resulting organic layer was then dried over Na<sub>2</sub>SO<sub>4</sub>, filtered and concentrated. The crude was purified by prep-HPLC to give the title compounds **2** (40 mg, 0.117 mmol, 25.7 % yield) and **3** (16 mg, 0.047 mmol, 10.26 % yield) as brown solids.

**2:** LCMS: 343 [M+H]<sup>+</sup>. *t<sub>R</sub>* = 1.121 mins. <sup>1</sup>H NMR (400MHz, DMSO-*d*<sub>6</sub>): δ 11.23 (br. s., 1H), 8.09 (s, 1H), 7.93 (s, 1H), 6.74 - 7.02 (m, 1H), 6.22 (d, *J* = 1.2 Hz, 1H), 4.47 (q, *J* = 7.2 Hz, 2H), 4.12 - 4.32 (m, 1H), 3.84 - 4.05 (m, 2H), 3.45 (td, *J* = 11.2, 2.4 Hz, 2H), 2.12 (s, 3H), 1.81 - 2.02 (m, 4H), 1.37 (t, *J* = 7.2 Hz, 3H). <sup>13</sup>C NMR (101 MHz, DMSO-*d*<sub>6</sub>): δ 162.8, 157.0, 155.1, 121.4, 120.9, 120.3, 98.6, 97.9, 66.5, 61.5, 57.3, 33.5, 15.2, 12.0. HRMS (ESI): *m/z* calcd for C<sub>17</sub>H<sub>22</sub>N<sub>6</sub>O<sub>2</sub> [M+H]<sup>+</sup> 343.1882, found [M+H]<sup>+</sup> 343.1888.

**3:** LCMS: 343 [M+H]<sup>+</sup>. *t<sub>R</sub>* = 1.478 mins. <sup>1</sup>H NMR (400MHz, DMSO-*d*<sub>6</sub>): δ 10.94 - 11.33 (m, 1H), 8.01 (s, 1H), 7.60 (s, 1H), 6.85 (d, *J* = 3.2 Hz, 1H), 6.20 (d, *J* = 3.2 Hz, 1H), 4.44 (q, *J* = 7.2 Hz, 2H), 4.20 - 4.39 (m, 1H), 3.96 (dd, *J* = 10.8, 3.6 Hz, 2H), 3.48 (t, *J* = 11.2 Hz, 2H), 2.20 (s, 3H), 2.03 (qd, *J* = 12.4, 4.4 Hz, 2H), 1.76 (dd, *J* = 12.4, 2.0 Hz, 2H), 1.35 (t, *J* = 7.2 Hz, 3H). <sup>13</sup>C NMR (101 MHz, DMSO-*d*<sub>6</sub>): δ 162.8, 157.8, 154.5, 136.2, 120.5, 120.1, 98.5, 97.9, 66.6, 61.4, 54.0, 33.0, 15.1, 9.1. HRMS (ESI): *m/z* calcd for C<sub>17</sub>H<sub>22</sub>N<sub>6</sub>O<sub>2</sub> [M+H]<sup>+</sup> 343.1882, found [M+H]<sup>+</sup> 343.1886.

**Synthesis of cis-4-ethoxy-*N*-(5-methyl-1-(2-methyl-tetrahydro-2*H*-pyran-4-yl)-1*H*-pyrazol-4-yl)-7*H*-pyrrolo-[2,3-*d'*]-pyrimidin-2-amine (4 and 5)**

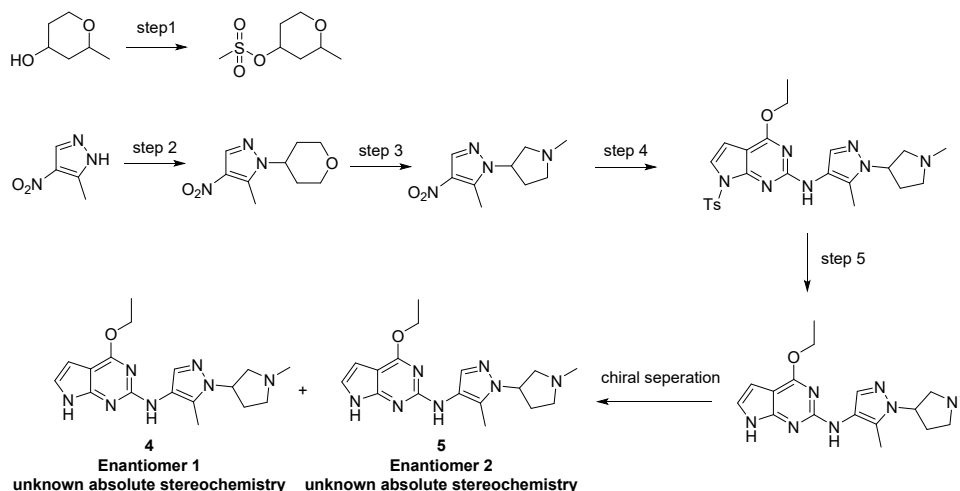

**Step 1:** *2-methyl-tetrahydro-2H-pyran-4-yl-methanesulfonate*. To a solution of 2-methyltetrahydro-2*H*-pyran-4-ol (1 g, 8.61 mmol) and DIPEA (2.255 mL, 12.91 mmol) in DCM (10 mL) stirred at 0 °C was added a solution of methanesulfonyl chloride (0.356 mL, 10.33 mmol) in DCM (2 mL) dropwise. The reaction mixture was stirred at room temperature for 1 hour. Satur. NaHCO<sub>3</sub> solution was added and the mixture was extracted with DCM (10 mL×3). The organic layer was dried over Na<sub>2</sub>SO<sub>4</sub> and concentrated in vacuum to give the title compound (1.1 g, 5.66 mmol, 65.8 % yield) as colorless oil. <sup>1</sup>H NMR (400MHz, CDCl<sub>3</sub>): δ 4.70 - 4.87 (m, 1H), 4.04 (ddd, *J* = 12.0, 4.9, 1.6 Hz, 1H), 3.31 - 3.52 (m, 2H), 3.03 (s, 3H), 2.01 - 2.20 (m, 2H), 1.73 - 1.87 (m, 1H), 1.44 - 1.57 (m, 1H), 1.20 - 1.26 (m, 3H).

**Step 2:** *5-methyl-1-(2-methyl-tetrahydro-2H-pyran-4-yl)-4-nitro-1H-pyrazole*. A solution of 5-methyl-4-nitro-1*H*-pyrazole (3.04 g, 23.89 mmol), 2-methyl-tetrahydro-2*H*-pyran-4-yl-methanesulfonate (5.8 g, 29.9 mmol) and Cs<sub>2</sub>CO<sub>3</sub> (9.73 g, 29.9 mmol) in acetonitrile (50 mL) was stirred overnight at 80 °C. The mixture was filtered and the solution was evaporated. The crude was purified by prep-HPLC to give the title compound (870 mg, 3.86 mmol, 16.1% yield) as colorless oil. LCMS: 226 [M+H]<sup>+</sup>.

**Step 3:** *5-methyl-1-(2-methyl-tetrahydro-2H-pyran-4-yl)-1H-pyrazol-4-amine*. A solution of 5-methyl-1-(2-methyl-tetrahydro-2*H*-pyran-4-yl)-4-nitro-1*H*-pyrazole (220 mg, 0.977 mmol) and iron (545 mg, 9.77 mmol) in ethanol (4 mL) and water (4.0 mL) was stirred overnight at room temperature. The mixture was filtered and the solution was concentrated. The crude was purified by chromatography on silica gel (DCM: MeOH=10:1) to give the title compound (200 mg, 0.727 mmol, 74.5 % yield) as black oil. LCMS: 196 [M+H]<sup>+</sup>. <sup>1</sup>H NMR (400MHz, CDCl<sub>3</sub>): δ 7.15 (s, 1H), 4.43 (m, *J* = 4.5 Hz, 1H), 4.20 - 4.30 (m, *J* = 9.3, 6.3, 6.3, 6.3, 3.0 Hz, 1H), 4.11 (td, *J* = 10.9, 3.0 Hz, 2H), 3.76 - 3.89 (m, 2H), 2.17 (s,

3H), 1.98 - 2.09 (m, 2H), 1.88 - 1.97 (m, 1H), 1.74 (dt,  $J = 9.2, 4.7$  Hz, 1H), 1.20 (d,  $J = 6.3$  Hz, 3H).

**Step 4:** *4-ethoxy-N-(5-methyl-1-(2-methyl-tetrahydro-2H-pyran-4-yl)-1H-pyrazol-4-yl)-7-tosyl-7H-pyrrolo [2,3-d] pyrimidin-2-amine*. To a solution of 2-chloro-4-ethoxy-7-tosyl-7H-pyrrolo-[2,3-d]-pyrimidine (541 mg, 1.536 mmol), 5-methyl-1-(2-methyl-tetrahydro-2H-pyran-4-yl)-1H-pyrazol-4-amine (200 mg, 1.024 mmol) and xtanphos (73.2 mg, 0.154 mmol) in 1,4-dioxane (2.0 mL) and water (0.2 mL) was added  $K_2CO_3$  (283 mg, 2.049 mmol) and  $PdCl_2(pddf)$  (84 mg, 0.102 mmol). The reaction was stirred overnight at 90 °C. The mixture was cooled to room temperature and partitioned between EtOAc (100 mL) and water (80 mL). The organic layer was washed with water (80 mL), dried over  $Na_2SO_4$  and evaporated in vacuum. The crude was purified by column chromatography on silica gel (PE: EA=3:1) to give the title compound (300 mg, 0.382 mmol, 37.3 % yield) as a white solid. LCMS: 511 [M+H]<sup>+</sup>. <sup>1</sup>H NMR (400MHz,  $CDCl_3$ ):  $\delta$  7.70 - 7.86 (m, 2H), 7.61 (s, 1H), 7.12 - 7.21 (m, 3H), 6.42 (d,  $J = 4.0$  Hz, 1H), 4.62 (t,  $J = 4.4$  Hz, 1H), 4.43 (q,  $J = 7.2$  Hz, 2H), 4.27 - 4.37 (m, 1H), 4.16 - 4.26 (m, 1H), 3.88 (dt,  $J = 11.2, 4.4$  Hz, 1H), 2.36 (s, 3H), 2.31 (s, 3H), 2.14 - 2.23 (m, 1H), 2.11 (dt,  $J = 8.8, 4.4$  Hz, 2H), 1.82 (ddd,  $J = 13.9, 9.0, 5.0$  Hz, 1H), 1.38 (t,  $J = 7.0$  Hz, 3H), 1.19 (d,  $J = 6.4$  Hz, 3H).

**Step 5:** *cis-4-ethoxy-N-(5-methyl-1-(2-methyl-tetrahydro-2H-pyran-4-yl)-1H-pyrazol-4-yl)-7H-pyrrolo-[2,3-d]-pyrimidin-2-amine (4 and 5)*. A solution of 4-ethoxy-N-(5-methyl-1-(2-methyl-tetrahydro-2H-pyran-4-yl)-1H-pyrazol-4-yl)-7-tosyl-7H-pyrrolo-[2,3-d] pyrimidin-2-amine (300 mg, 0.588 mmol) and sodium hydroxide (0.588 mL, 1.175 mmol, 2M in water) in THF (2 mL) and methanol (0.500 mL) was stirred at 50 °C for 3 hours. After cooling, the reaction mixture was poured into water (50 mL) and extracted with EtOAc (40 mL × 3). The combined organic layer was dried and evaporated in vacuum. The crude was purified by prep-HPLC to give the product (150 mg, 0.391 mmol, 66.6 % yield), which was further purified by chiral-HPLC (Column AY-H (4.6×250mm, 5 $\mu$ m); Mobile Phase: n-Hexane (0.1%DEA): EtOH(0.1%DEA) =85:15) to give the title compounds **4** (44 mg, 0.123 mmol, 29.3 % yield) and **5** (50 mg, 0.140 mmol, 33.3 % yield) as white solids.

**4:** LCMS: 357 [M+H]<sup>+</sup>.  $t_R = 1.21$  mins. (LCMS condition 2)

Chiral HPLC:  $t_R = 6.61$  mins. (Condition: Column AY-H (4.6×250mm, 5 $\mu$ m); Co-Solvent MeOH) unknown absolute stereochemistry

<sup>1</sup>H NMR (400MHz,  $CDCl_3$ ):  $\delta$  9.99 (br. s., 1H), 7.66 (s, 1H), 6.42 (br. s., 1H), 6.30 (d,  $J = 2.2$  Hz, 1H), 6.10 (s, 1H), 4.49 (q,  $J = 7.3$  Hz, 2H), 4.43 (t,  $J = 4.3$  Hz, 1H), 4.21 (t,  $J = 6.1$  Hz, 1H), 4.07 - 4.16 (m, 1H), 3.81 (dt,  $J = 11.4, 4.2$  Hz, 1H), 2.22 (s, 3H), 1.95 - 2.05 (m, 2H), 1.85 - 1.95 (m, 1H), 1.64 - 1.75 (m, 3H), 1.43 (t,  $J = 7.1$  Hz, 3H), 1.16 (d, 3H). <sup>13</sup>C NMR (101 MHz, DMSO- $d_6$ ):  $\delta$  162.8, 157.7, 155.2, 133.7, 120.8, 120.2, 98.5, 97.9, 68.3, 62.0, 61.4, 49.8, 37.4, 30.9, 20.9, 15.1, 9.3.

**5:** LCMS: 357 [M+H]<sup>+</sup>.  $t_R = 1.21$  mins. (LCMS condition 2)

Chiral HPLC:  $t_R = 7.99$  mins. (Condition: Column AY-H (4.6×250mm, 5 $\mu$ m); Co-Solvent MeOH) unknown absolute stereochemistry

<sup>1</sup>H NMR (400MHz,  $CDCl_3$ ):  $\delta$  9.66 (br. s., 1H), 7.68 (s, 1H), 6.49 (br. s., 1H), 6.32 (br. s., 1H), 6.08 (s, 1H), 4.41 - 4.54 (m, 3H), 4.18 - 4.28 (m, 1H), 4.13 (td,  $J = 11.0, 2.7$  Hz, 1H), 3.82 (dt,  $J = 11.5, 4.2$  Hz, 1H), 2.22 (s, 3H), 1.97 - 2.07 (m, 2H), 1.87 - 1.97 (m, 1H), 1.71 (ddd,  $J = 14.0, 9.2, 4.9$  Hz, 3H), 1.43 (t,  $J = 7.1$  Hz, 3H), 1.17 (d, 3H). <sup>13</sup>C NMR (101 MHz, DMSO- $d_6$ ):

$\delta$  162.8, 157.7, 155.2, 133.7, 130.2, 120.8, 120.2, 98.5, 97.9, 68.3, 62.0, 61.4, 49.8, 37.4, 30.9, 20.9, 15.1, 9.3.

**Synthesis of 4-ethoxy-*N*-(5-methyl-1-(tetrahydro-2*H*-pyran-3-yl)-1*H*-pyrazol-4-yl)-7*H*-pyrrolo-[2,3-*d*]pyrimidin-2-amine (6 and 7)**

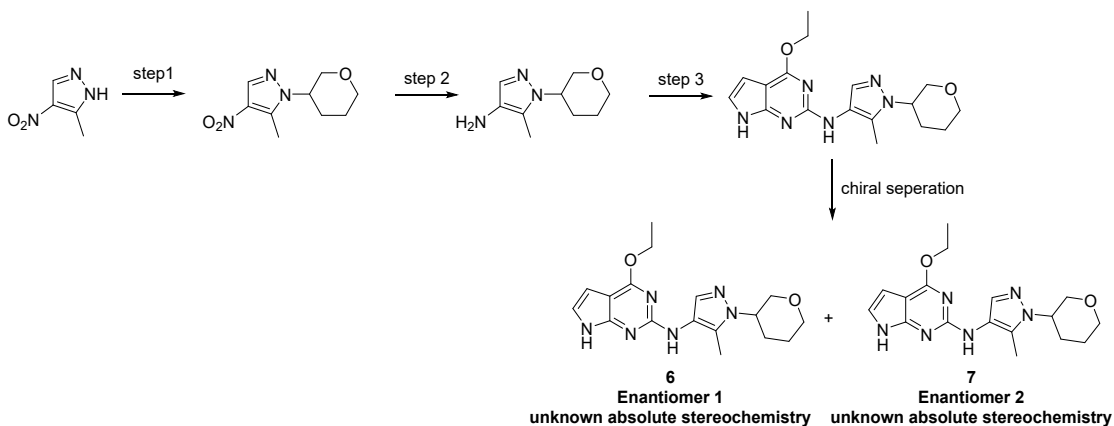

**Step 1:** *5-methyl-4-nitro-1-(tetrahydro-2*H*-pyran-3-yl)-1*H*-pyrazole*. A solution of 5-methyl-4-nitro-1*H*-pyrazole (1.5 g, 11.80 mmol) and tetrahydro-2*H*-pyran-3-yl methanesulfonate (3.19 g, 17.70 mmol) in DMF (15 mL) was added potassium carbonate (2.447 g, 17.70 mmol) was stirred overnight at 90 °C. The mixture was diluted with water and extracted with EtOAc. The organic layer was concentrated in vacuum and purified by column chromatography on silica gel (PE: EA=2: 1) and further purified with pre-HPLC to get the title compounds 5-methyl-4-nitro-1-(tetrahydro-2*H*-pyran-3-yl)-1*H*-pyrazole (500 mg, 50% yield, mixture) as a white solid. LCMS: 212 [M+H]<sup>+</sup>. *t<sub>R</sub>* =1.266 mins. (LCMS condition 2)

**Step 2:** *5-methyl-1-(tetrahydro-2*H*-pyran-3-yl)-1*H*-pyrazol-4-amine*. A solution of 5-methyl-4-nitro-1-(tetrahydro-2*H*-pyran-3-yl)-1*H*-pyrazole (450 mg, 2.131 mmol, not pure) and iron (595 mg, 10.65 mmol) in ethanol (2 mL) and water (2.000 mL) was stirred at 80 °C about 1 hours. The mixture was filtered and concentrated. The crude was purified by column chromatography on silica gel (PE: EA=1:1) to give the title compound 5-methyl-1-(tetrahydro-2*H*-pyran-3-yl)-1*H*-pyrazol-4-amine (150 mg, 0.828 mmol, 38.8 % yield, not pure) as a yellow solid. LCMS: 182 [M+H]<sup>+</sup>. *t<sub>R</sub>* =0.98 mins. (LCMS condition 2)

**Step 3:** *4-ethoxy-*N*-(5-methyl-1-(tetrahydro-2*H*-pyran-3-yl)-1*H*-pyrazol-4-yl)-7*H*-pyrrolo-[2,3-*d*]pyrimidin-2-amine (6 and 7)*. A solution of **52** (126 mg, 0.638 mmol), 5-methyl-1-(tetrahydro-2*H*-pyran-3-yl)-1*H*-pyrazol-4-amine (139 mg, 0.765 mmol), Pd<sub>2</sub>(dba)<sub>3</sub> (55.6 mg, 0.061 mmol, not pure), potassium carbonate (264 mg, 1.913 mmol) and xtanphos (30.4 mg, 0.064 mmol) in 2-butanol (4 mL) was irradiated by microwave at 120 °C for 45 min. After filtration, the filtrate was concentrated and the crude was purified by chiral-HPLC (Co-Solvent MeOH (0.1%DEA); Column AD-H (4.6\*250mm, 5μm); Column Temperature 39.8; CO<sub>2</sub> Flow Rate 2.1; Co-Solvent Flow Rate 0.9; Co-Solvent % 30; Back Pressure 120; Total Flow 3; PDA Start Wavelength 214; PDA Stop Wavelength 359) to give

the title compounds **6** (21 mg, 0.061 mmol, 9.62 % yield) and **7** (21 mg, 0.061 mmol, 9.62 % yield) as white solids.

**6**: LCMS: 343 [M+H]<sup>+</sup>.  $t_R$  = 1.329 mins. (LCMS condition 2), Chiral HPLC:  $t_R$  = 3.53 mins. Unknown absolute stereochemistry

<sup>1</sup>H NMR (400MHz, DMSO-*d*<sub>6</sub>) :  $\delta$  11.17 (br. s., 1H), 8.00 (s, 1H), 7.61 (s, 1H), 6.78 - 6.93 (m, 1H), 6.20 (dd,  $J$  = 3.3, 2.0 Hz, 1H), 4.37 - 4.51 (m, 2H), 4.09 - 4.26 (m, 1H), 3.87 (dd,  $J$  = 10.8, 2.3 Hz, 2H), 3.46 - 3.61 (m, 1H), 3.33 - 3.38 (m, 1H), 2.20 (s, 3H), 1.92 - 2.16 (m, 2H), 1.63 - 1.82 (m, 2H), 1.30 - 1.44 (m, 3H). <sup>13</sup>C NMR (101 MHz, DMSO-*d*<sub>6</sub>):  $\delta$  162.8, 157.7, 155.2, 134.4, 130.4, 120.6, 120.2, 98.5, 98.0, 70.7, 67.5, 61.4, 53.7, 29.7, 25.6, 15.1, 9.0.

**7**: LCMS: 343 [M+H]<sup>+</sup>.  $t_R$  = 1.330 mins. (LCMS condition 2), Chiral HPLC:  $t_R$  = 4.15 mins.

Unknown absolute stereochemistry

<sup>1</sup>H NMR (400MHz, DMSO-*d*<sub>6</sub>) :  $\delta$  11.17 (br. s., 1H), 8.00 (s, 1H), 7.61 (s, 1H), 6.85 (br. s., 1H), 6.21 (br. s., 1H), 4.44 (q,  $J$  = 6.9 Hz, 2H), 4.05 - 4.29 (m, 1H), 3.87 (d,  $J$  = 10.3 Hz, 2H), 3.54 (t,  $J$  = 10.5 Hz, 1H), 3.41 (m, 1H), 2.20 (s, 3H), 1.94 - 2.14 (m, 2H), 1.65 - 1.83 (m, 2H), 1.35 (t,  $J$  = 7.0 Hz, 3H). <sup>13</sup>C NMR (101 MHz, DMSO-*d*<sub>6</sub>):  $\delta$  162.8, 157.7, 155.2, 134.4, 130.3, 120.6, 120.2, 98.5, 98.0, 70.8, 67.5, 61.4, 53.7, 29.7, 25.6, 15.1, 9.0.

## **2.4 Synthesis of 4-ethoxy-*N*-(5-methyl-1-(tetrahydrofuran-3-yl)-1*H*-pyrazol-4-yl)-7*H*-pyrrolo-[2,3-*d*]-pyrimidin-2-amine (8 and 9)**

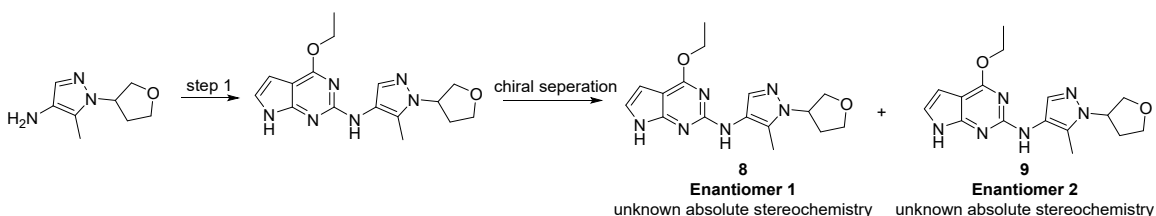

A solution of 2-chloro-4-ethoxy-7*H*-pyrrolo[2,3-*d*]pyrimidine (which can be prepared according to D1) (49 mg, 0.248 mmol), 5-methyl-1-(tetrahydrofuran-3-yl)-1*H*-pyrazol-4-amine (49.8 mg, 0.298 mmol) (which may be prepared according to PCT Int. Appl., WO2012062783),  $\text{Pd}_2(\text{dba})_3$  (11.35 mg, 0.012 mmol), potassium carbonate (103 mg, 0.744 mmol) and (9,9-dimethyl-9*H*-xanthene-4,5-diyl)-bis(diphenylphosphine) (11.82 mg, 0.025 mmol) in 2-butanol (5 mL) was irradiated by microwave at 120 °C for 45 min. The reaction mixture was quenched with water, partitioned between ethyl acetate (25 mL) and water (5 mL). The organic layer was washed with water, and then saturated  $\text{NaHCO}_3$ . Then, the resulting organic phase was dried over  $\text{Na}_2\text{SO}_4$ , filtered and concentrated. The crude was purified by chiral-HPLC (Co-Solvent MeOH (0.1%DEA); Column OJ-H (4.6\*250mm, 5 $\mu$ m); Column Temperature 39.8;  $\text{CO}_2$  Flow Rate 2.4; Co-Solvent Flow Rate 0.6; Co-Solvent % 20; Back Pressure 120; Total Flow 3; PDA Start Wavelength 214; PDA Stop Wavelength 359) to give the title compounds **8** (18 mg, 24.56% yield) and **9** (10mg, 15.43% yield) as white solids.

**8**: LCMS: 329 [M+H]<sup>+</sup>.  $t_R$  = 1.267 mins. (LCMS condition 2)



Chiral HPLC:  $t_R$  = 2.85 mins. (Conditions: Column OJ-H (4.6\*250mm, 5 $\mu$ m); Co-Solvent MeOH (0.1%DEA)) unknown absolute stereochemistry

$^1\text{H}$  NMR (400MHz, DMSO- $d_6$ ):  $\delta$  10.95 - 11.29 (m, 1H), 8.02 (s, 1H), 7.60 (s, 1H), 6.84 (d,  $J$  = 2.3 Hz, 1H), 6.20 (d,  $J$  = 2.8 Hz, 1H), 4.88 - 5.00 (m, 1H), 4.43 (d,  $J$  = 7.0 Hz, 2H), 3.90 - 4.13 (m, 2H), 3.68 - 3.90 (m, 2H), 2.23 - 2.32 (m, 2H), 2.18 (s, 3H), 1.34 (t, 3H).  $^{13}\text{C}$  NMR (101 MHz, DMSO- $d_6$ ):  $\delta$  162.8, 157.7, 155.2, 134.4, 121.0, 120.2, 98.5, 98.0, 72.0, 67.8, 61.4, 57.7, 32.4, 15.1, 9.3.

**9:** LCMS: 329 [M+H] $^+$ .  $t_R$  = 1.255 mins. (LCMS condition 2)

Chiral HPLC:  $t_R$  = 4.28 mins. (Conditions: Column OJ-H (4.6\*250mm, 5 $\mu$ m); Co-Solvent MeOH (0.1%DEA)) unknown absolute stereochemistry

$^1\text{H}$  NMR (400MHz, DMSO- $d_6$ ):  $\delta$  11.20 (br. s., 1H), 8.06 (s, 1H), 7.61 (s, 1H), 6.78 - 6.96 (m, 1H), 6.00 - 6.34 (m, 1H), 4.89 - 5.05 (m, 1H), 4.44 (q,  $J$  = 6.9 Hz, 2H), 3.92 - 4.10 (m, 2H), 3.66 - 3.89 (m, 2H), 2.29 (q,  $J$  = 6.4 Hz, 2H), 2.20 (s, 3H), 1.36 (t, 3H). HRMS (ESI):  $m/z$  calcd for  $\text{C}_{16}\text{H}_{20}\text{N}_6\text{O}_2$  [M+H] $^+$  329.1726, found [M+H] $^+$  329.1723.

### **Synthesis of 4-ethoxy-N-(5-methyl-1-(oxetan-3-yl)-1H-pyrazol-4-yl)-7H-pyrrolo[2,3-d]pyrimidin-2-amine (10)**

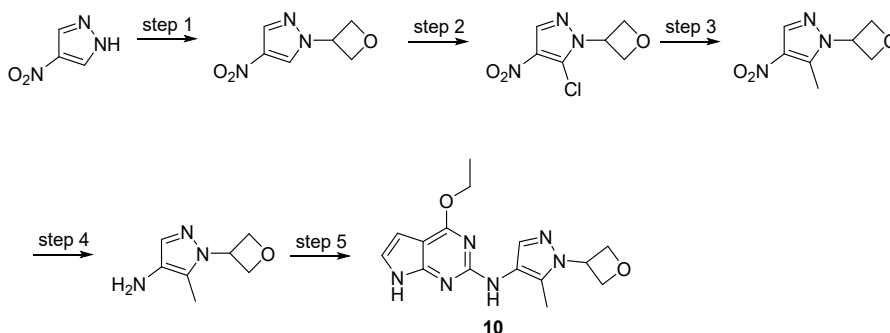

**Step 1:** 4-nitro-1-(oxetan-3-yl)-1H-pyrazole. A solution of 4-nitro-1H-pyrazole (4.46 g, 39.4 mmol), oxetan-3-yl methanesulfonate (5.0 g, 32.9 mmol) and  $\text{K}_2\text{CO}_3$  (9.08 g, 65.7 mmol) in DMF (50 mL) was stirred at 80  $^\circ\text{C}$  for 60 hours. The mixture was added to water and extracted with ethyl acetate. The ethyl acetate layer was dried with  $\text{Na}_2\text{SO}_4$  and evaporated to give the crude product which was added to a silica gel column and eluted with PE/DCM (5/1 to 1/1, 3000 mL) to the title compound (3.5 g, 18.62 mmol, 56.7 % yield) as yellow oil. LCMS:  $t_R$  = 1.339 mins,  $\text{MH}^+$  = 170

**Step 2:** 5-chloro-4-nitro-1-(oxetan-3-yl)-1H-pyrazole. To a solution of 4-nitro-1-(oxetan-3-yl)-1H-pyrazole (2 g, 11.82 mmol) in THF (5 mL) stirred under nitrogen at -78  $^\circ\text{C}$  was added a solution of lithium bis(trimethylsilyl)amide (6.66 mL, 35.5 mmol) in THF (5 mL) dropwise during 15 min. The reaction mixture was stirred at -78  $^\circ\text{C}$  for 30 min. A solution of perchloroethane (3.35 mL, 29.6 mmol) was added and the mixture was stirred for 3h at -78  $^\circ\text{C}$  under  $\text{N}_2$ . The mixture was quenched with aq  $\text{NH}_4\text{Cl}$  and evaporated to give the crude product. The crude product was added to a silica gel column and eluted with PE/EtOAc (15/1) to afford (600 mg, 2.95 mmol, 24.92 % yield) (N28616-97-A1) as white solid. LCMS:  $t_R$  = 1.363 mins,  $\text{M}+\text{H}$  = 204

**Step 3:** *5-methyl-4-nitro-1-(oxetan-3-yl)-1H-pyrazole*. To a solution of methylboronic acid (353 mg, 5.89 mmol), 5-chloro-4-nitro-1-(oxetan-3-yl)-1H-pyrazole (400 mg, 1.965 mmol) and sodium carbonate (625 mg, 5.89 mmol) in 1,4- Dioxane (4 mL) and Water (0.400 mL) was added PdCl<sub>2</sub>(dppf)-CH<sub>2</sub>Cl<sub>2</sub> adduct (160 mg, 0.196 mmol). The reaction mixture was combined in a thick walled glass tube. The tube was sealed with a rubber septum, purged with nitrogen and stirred at 75 °C overnight. The mixture was cooled to room temperature, and evaporated in vacuo to give a black solid, which was added to a silica gel column and eluted with PE/ EtOAc (15/1 to 10/1, 1000 mL) to give (180 mg, 0.796 mmol, 40.5 % yield) as a white solid. LCMS: rt =1.072mins, MH<sup>+</sup> = 184

**Step 4:** *5-methyl-1-(oxetan-3-yl)-1H-pyrazol-4-amine*. The mixture of *5-methyl-4-nitro-1-(oxetan-3-yl)-1H-pyrazole* (160 mg, 0.874 mmol) and iron (244 mg, 4.37 mmol) in Ethanol (2 mL) and Water (2.000 mL) was stirred at 80 °C about 1 h. The mixture was filtered and concentrated, the residue was purified by Pre-TLC (PE:EtOAc=1:1) to get *5-methyl-1-(oxetan-3-yl)-1H-pyrazol-4-amine* (120 mg, 0.705 mmol, 81 % yield).

**Step 5:** *4-ethoxy-N-(5-methyl-1-(oxetan-3-yl)-1H-pyrazol-4-yl)-7H-pyrrolo[2,3-d]pyrimidin-2-amine*. A solution of 50 (120mg, 0.607 mmol), *5-methyl-1-(oxetan-3-yl)-1H-pyrazol-4-amine* (102 mg, 0.668 mmol), Pd<sub>2</sub>(dba)<sub>3</sub> (55.6 mg, 0.061 mmol), (9,9-dimethyl-9H-xanthene-4,5-diyl)bis- (diphenylphosphine) (52.7 mg, 0.091 mmol) and potassium carbonate (252 mg, 1.822 mmol) in 2-butanol (1 mL) was irradiated by microwave at 130 °C for 90 min. The reaction mixture was partitioned between ethyl acetate (25 mL) and water (25 mL). The organic layer was washed with water, saturated NaHCO<sub>3</sub> and brine, dried over Na<sub>2</sub>SO<sub>4</sub>, filtered and concentrated. The crude was purified by prep-HPLC to give the title compound (60 mg, 0.191 mmol, 31.4 % yield) as a white solid. LCMS: 315 [M+H]<sup>+</sup>. t<sub>R</sub> =1.445 mins. (LCMS condition 2) <sup>1</sup>H NMR (400MHz, DMSO-*d*<sub>6</sub>): δ 11.18 (br. s., 1H), 8.07 (s, 1H), 7.75 (s, 1H), 6.80 - 6.92 (m, 1H), 6.21 (dd, *J* = 3.3, 1.8 Hz, 1H), 5.37 - 5.62 (m, 1H), 4.92 - 4.99 (m, 2H), 4.84 - 4.91 (m, 2H), 4.45 (q, *J* = 7.1 Hz, 2H), 2.13 (s, 3H), 1.36 (t, *J* = 7.0 Hz, 3H). <sup>13</sup>C NMR (101 MHz, DMSO-*d*<sub>6</sub>): δ 162.8, 157.6, 155.2, 135.3, 121.2, 120.2, 98.5, 98.0, 76.8, 61.5, 51.3, 15.1, 9.0. HRMS (ESI): *m/z* calcd for C<sub>15</sub>H<sub>18</sub>N<sub>6</sub>O<sub>2</sub> [M+H]<sup>+</sup> 315.1569, found [M+H]<sup>+</sup> 315.1570.

**Synthesis of 4-ethoxy-N-(5-methyl-1-(1-methylpyrrolidin-3-yl)-1H-pyrazol-4-yl)-7H-pyrrolo-[2,3-d]-pyrimidin-2-amine (11 and 12)**

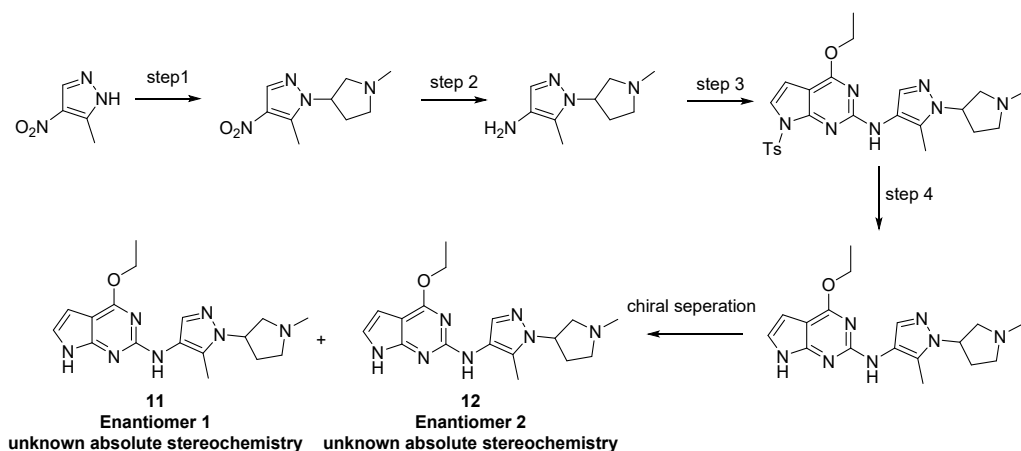

**Step 1:** *5-methyl-1-(1-methylpyrrolidin-3-yl)-4-nitro-1H-pyrazole*. A mixture of 3-methyl-4-nitro-1H-pyrazole (1.4 g, 11.01 mmol), 1-methylpyrrolidin-3-yl methanesulfonate (2.369 g, 13.22 mmol) and  $\text{Cs}_2\text{CO}_3$  (10.77g, 33.0 mmol) was stirred at 80 °C for 12 h. After cooling the reaction and water (30 ml) was poured into the mixture, extracted with EtOAc (15 ml\*3). The organic phase was dried over sodium sulphate and evaporated in vacuo to give residue. The residue was purified by silica gel column chromatography (PE: EA = 3:1) to the title compound (290 mg, 1.379 mmol, 12.52 % yield) as a yellow oil.  $\text{MH}^+ = 211.0$

**Step 2:** *(±)-5-methyl-1-(1-methylpyrrolidin-3-yl)-1H-pyrazol-4-amine*. To a solution of *5-methyl-1-(1-methylpyrrolidin-3-yl)-4-nitro-1H-pyrazole* (290 mg, 1.379 mmol) in methanol (30 mL) stirred in Hydrogen at room temp was added solid Pd/C (44 mg, 0.413 mmol) in one charge. The reaction mixture was stirred at rt for 3 h. Filtered and concentrated to get the product (240 mg, 1.331 mmol, 97 % yield) as a yellow oil. LCMS:  $t_R = 1.73$  mins,  $\text{MH}^+ = 181.0$ .

**Step 3:** *(±)-4-ethoxy-N-(5-methyl-1-(1-methyl-pyrrolidin-3-yl)-1H-pyrazol-4-yl)-7-tosyl-7H-pyrrolo-[2,3-d]-pyrimidin-2-amine*. To a solution of *(±)-5-methyl-1-(1-methylpyrrolidin-3-yl)-1H-pyrazol-4-amine* (237 mg, 1.313 mmol), 2-chloro-4-ethoxy-7-tosyl-7H-pyrrolo-[2,3-d]-pyrimidine (420 mg, 1.194 mmol) and (9,9-dimethyl-9H-xanthene-4,5-diyl)bis-(diphenylphosphine) (104 mg, 0.179 mmol) in 1,4-dioxane (2.0 mL) and water (0.2 mL) was added potassium carbonate (330 mg, 2.388 mmol) and  $\text{PdCl}_2(\text{dppf})\cdot\text{CH}_2\text{Cl}_2$  (97 mg, 0.119 mmol). The reaction was stirred overnight at 90 °C. The mixture was diluted with water (100 mL) and extracted with ethyl acetate (2 × 40 mL). The combined organic layer was washed with brine (20 mL), dried with  $\text{Na}_2\text{SO}_4$ , filtered and concentrated. The residue was purified by chromatography on silica gel (DCM: MeOH = 3:1) to give the title compound *(±)-4-ethoxy-N-(5-methyl-1-(1-methyl-pyrrolidin-3-yl)-1H-pyrazol-4-yl)-7-tosyl-7H-pyrrolo-[2,3-d]-pyrimidin-2-amine* (240 mg, 0.498 mmol, 41.7 % yield) as a black solid. LCMS: 495.7  $[\text{M}+\text{H}]^+$ .  $t_R = 1.58$ mins. (LCMS condition 2)

**Step 4:** *4-ethoxy-N-(5-methyl-1-(1-methylpyrrolidin-3-yl)-1H-pyrazol-4-yl)-7H-pyrrolo-[2,3-d]-pyrimidin-2-amine*. A solution of *(±)-4-ethoxy-N-(5-methyl-1-(1-methyl-pyrrolidin-3-yl)-1H-pyrazol-4-yl)-7-tosyl-7H-pyrrolo-[2,3-d]-pyrimidin-2-amine* (240 mg, 0.484 mmol) and sodium hydroxide (3 mL, 6.00 mmol) in methanol (15 mL) was stirred at 50 °C for 2 hours. The mixture was concentrated and saturated  $\text{NaHCO}_3$  was added until pH=8.

The mixture was extracted with EtOAc (50 mL×3). The organic layer was dried over Na<sub>2</sub>SO<sub>4</sub>, filtered and concentrated. The crude was purified by chromatography on silica gel (DCM: MeOH = 8:1) to give the racemic product, which was further purified by chiral-HPLC (Co-Solvent MeOH (0.1%DEA); Column AD-H (4.6\*250mm, 5μm); Column Temperature 39.8; CO<sub>2</sub> Flow Rate 1.95; Co-Solvent Flow Rate 1.05; Co-Solvent % 35; Back Pressure 120; Total Flow 3; PDA Start Wavelength 214; PDA Stop Wavelength 359) to give the title compounds **13** (30 mg, 0.088 mmol, 18.15 % yield) and **14** (30 mg, 0.088 mmol, 18.15 % yield) as white solids.

**11:** LCMS: 342 [M+H]<sup>+</sup>. t<sub>R</sub> = 1.244 mins. (LCMS condition 2)

Chiral HPLC: t<sub>R</sub> = 3.2 mins. (Conditions: Column AD-H (4.6\*250mm, 5μm); Co-Solvent MeOH (0.1%DEA)) unknown absolute stereochemistry

<sup>1</sup>H NMR (400MHz, DMSO-*d*<sub>6</sub>): δ 8.01 (s, 1H), 7.58 (s, 1H), 6.63 - 6.96 (m, 1H), 6.20 (d, *J* = 1.3 Hz, 1H), 4.71 - 4.96 (m, 1H), 4.44 (q, *J* = 7.0 Hz, 2H), 3.00 (t, *J* = 8.3 Hz, 1H), 2.64 - 2.76 (m, 1H), 2.53 - 2.61 (m, 2H), 2.26 - 2.31 (m, 2H), 2.13 - 2.26 (m, 5H), 1.35 (t, *J* = 7.0 Hz, 3H). <sup>13</sup>C NMR (101 MHz, DMSO-*d*<sub>6</sub>): δ 162.8, 157.4, 155.2, 134.2, 120.8, 120.1, 98.5, 97.9, 61.5, 61.4, 57.1, 55.6, 42.2, 31.4, 15.1, 9.3. HRMS (ESI): *m/z* calcd for C<sub>17</sub>H<sub>23</sub>N<sub>7</sub>O [M+H]<sup>+</sup> 342.2042, found [M+H]<sup>+</sup> 342.2042.

**12:** LCMS: 342 [M+H]<sup>+</sup>. t<sub>R</sub> = 1.237 mins. (LCMS condition 2)

Chiral HPLC: t<sub>R</sub> = 4.9 mins. (Conditions: Column AD-H (4.6\*250mm, 5μm); Co-Solvent MeOH (0.1%DEA)) unknown absolute stereochemistry

<sup>1</sup>H NMR (400MHz, DMSO-*d*<sub>6</sub>): δ 11.18 (br. s., 1H), 8.00 (s, 1H), 7.58 (s, 1H), 6.85 (br. s., 1H), 6.21 (d, *J* = 1.0 Hz, 1H), 4.83 (m, 1H), 4.44 (q, *J* = 6.9 Hz, 2H), 3.00 (t, *J* = 8.3 Hz, 1H), 2.65 - 2.74 (m, 1H), 2.53 - 2.61 (m, 2H), 2.28 (s, 3H), 2.12 - 2.26 (m, 5H), 1.35 (t, *J* = 7.0 Hz, 3H). <sup>13</sup>C NMR (101 MHz, DMSO-*d*<sub>6</sub>): δ 162.8, 157.7, 155.2, 134.3, 120.8, 120.1, 98.5, 97.9, 61.5, 61.4, 57.1, 55.6, 42.2, 31.4, 15.1, 8.8.

### **Synthesis of 4-ethoxy-N-(5-methyl-1-(1-methylpiperidin-4-yl)-1H-pyrazol-4-yl)-7H-pyrrolo-[2,3-*d*]-pyrimidin-2-amine (13)**

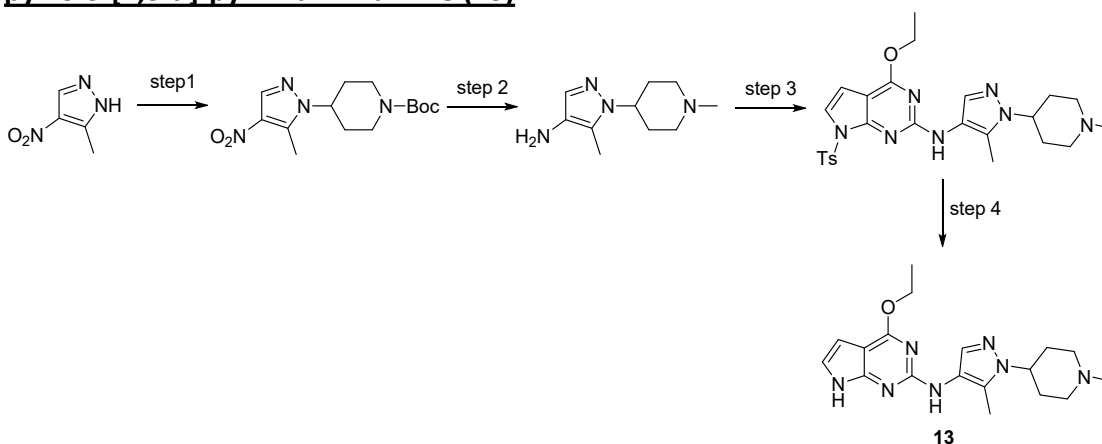

**Step 1:** To a solution of tert-butyl 4-((methylsulfonyl)oxy)piperidine-1-carboxylate (286 mg, 1.023 mmol) and potassium carbonate (109 mg, 0.787 mmol) in N,N-Dimethylformamide (DMF) (5 mL) was added 5-methyl-4-nitro-1H-pyrazole (100mg,

0.787 mmol). The reaction mixture was stirred at 80 °C for 2 h.(N28381-91-R1). The reaction mixture was poured into EtOAc(20 ml) and washed with water (3\*30 ml). The combined organic layer was evaporated in vacuo to give the crude (N28381-91-A1) tertbutyl 4-(5-methyl-4-nitro-1H-pyrazol-1-yl)piperidine-1-carboxylate (200 mg, 0.374 mmol, 47.5 % yield) as yellow oil. LCMS: [M-Boc+1]=255 ,tR=1.87 min

**Step 2:** To a solution of tert-butyl 4-(5-methyl-4-nitro-1H-pyrazol-1-yl)piperidine-1-carboxylate (240 mg, 0.773 mmol) in Tetrahydrofuran (THF) (8 mL) was added LiAlH<sub>4</sub> (176 mg, 4.64 mmol) at room temperature. The reaction mixture was refluxed at 80 °C for 2 h. LCMS: rt = 0.95 mins, MH<sup>+</sup> =195.1

**Step 3:** *4-ethoxy-N-(3-methyl-1-(1-methylpiperidin-4-yl)-1H-pyrazol-4-yl)-7-tosyl-7H-pyrrolo-[2,3-d]pyrimidin-2-amine*. To a solution of 2-chloro-4-ethoxy-7-tosyl-7H-pyrrolo-[2,3-d]-pyrimidine (362 mg, 1.029 mmol), a mixture of 5-methyl-1-(1-methylpiperidin-4-yl)-1H-pyrazol-4-amine and 3-methyl-1-(1-methylpiperidin-4-yl)-1H-pyrazol-4-amine (200 mg, 1.029 mmol) (9,9-dimethyl-9H-xanthene-4,5-diyl)bis(diphenylphosphine) (89 mg, 0.154 mmol) in 1,4-dioxane (2.0 mL) and water (0.2 mL) was added potassium carbonate (285 mg, 2.059 mmol) and PdCl<sub>2</sub>(pddf) (84 mg, 0.103 mmol). The reaction mixture was stirred at 90 °C overnight. The mixture was cooled to room temperature and partitioned between EtOAc (25 mL) and water (20 mL). The organic layer was washed with water (20 mL), dried over Na<sub>2</sub>SO<sub>4</sub> and evaporated. The crude was purified by Biotage to give the mixture of the title compounds (130 mg, 0.140 mmol, 13.63 % yield) as yellow oil. LCMS: 510.1 [M+H]<sup>+</sup>. t<sub>R</sub> =1.45mins. (LCMS condition 2)

**Step 4:** *4-ethoxy-N-(5-methyl-1-(1-methylpiperidin-4-yl)-1H-pyrazol-4-yl)-7H-pyrrolo-[2,3-d]-pyrimidin-2-amine*. A solution of a mixture of 4-ethoxy-N-(5-methyl-1-(1-methylpiperidin-4-yl)-1H-pyrazol-4-yl)-7-tosyl-7H-pyrrolo-[2,3-d]pyrimidin-2-amine (260 mg, 0.510 mmol), sodium hydroxide (0.510 mL, 1.020 mmol, 2M in water) in THF (5 mL) was stirred at 60 °C for 1 hour. The reaction mixture was poured into EtOAc (20 mL) and extracted with water (3\*30 mL). The organic layer was evaporated in vacuo and purified by prep-HPLC to give the title compound (16 mg, 0.045 mmol, 8.82 % yield) as a white solid. LCMS: 356.2 [M+H]<sup>+</sup>. t<sub>R</sub> =1.27 mins. (LCMS condition 2) <sup>1</sup>H NMR (400MHz, CDCl<sub>3</sub>): δ 9.16 (br. s., 1H), 7.69 (s, 1H), 6.60 (m, 1H), 6.35 (d, J = 1.8 Hz, 1H), 6.06 (s, 1H), 4.49 (q, J = 7.0 Hz, 2H), 4.00 (m, 1H), 3.05 (m, 2H), 2.10 - 2.44 (m, 10H), 1.90 (m, 2H), 1.43 (t, J = 7.0 Hz, 3H). HRMS (ESI): m/z calcd for C<sub>18</sub>H<sub>25</sub>N<sub>7</sub>O [M+H]<sup>+</sup> 356.2199, found [M+H]<sup>+</sup> 356.2196.

**Synthesis of 4-ethoxy-N-(1-(2-methoxyethyl)-5-methyl-1H-pyrazol-4-yl)-7H-pyrrolo-[2,3-d]-pyrimidin-2-amine (14)**

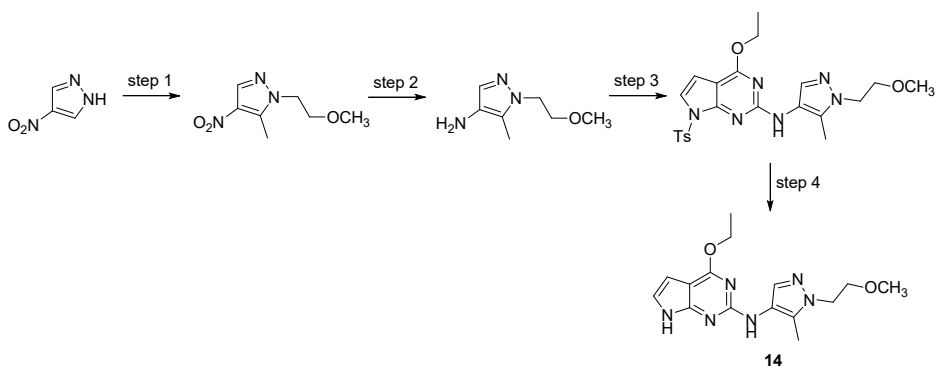

**Step 1:** *1-(2-methoxyethyl)-5-methyl-4-nitro-1H-pyrazole*. A mixture of 3-methyl-4-nitro-1H-pyrazole (1.50 g, 11.80 mmol), 1-bromo-2-methoxyethane (1.968 g, 14.16 mmol) and  $\text{Cs}_2\text{CO}_3$  (7.69 g, 23.6 mmol) in acetonitrile (20 mL) was stirred overnight at 80 °C. The mixture was filtered and concentrated in vacuo to give the title compound (1.1 g, together with the isomer) as oil. LCMS: 186  $[\text{M}+\text{H}]^+$ .

**Step 2:** *1-(2-methoxyethyl)-5-methyl-1H-pyrazol-4-amine*. A solution of 1-(2-methoxyethyl)-5-methyl-4-nitro-1H-pyrazole (1.1 g, 5.94 mmol, together with the isomer) and Pd/C (165 mg, 1.550 mmol) in methanol (10 mL) was stirred under  $\text{H}_2$  at room temperature for 1 hour. The mixture was filtrated and the filtrate was concentrated to give the title compound (920 mg, together with the isomer) as a yellow oil. LCMS: 156  $[\text{M}+\text{H}]^+$ .

**Step 3:** *4-ethoxy-N-(1-(2-methoxyethyl)-5-methyl-1H-pyrazol-4-yl)-7-tosyl-7H-pyrrolo-[2,3-d]-pyrimidin-2-amine*. A solution of 2-chloro-4-ethoxy-7-tosyl-7H-pyrrolo-[2,3-d]-pyrimidine (318 mg, 2.047 mmol), 1-(2-methoxyethyl)-5-methyl-1H-pyrazol-4-amine (318 mg, 2.047 mmol, together with the isomer), xphos (148 mg, 0.256 mmol),  $\text{K}_2\text{CO}_3$  (471 mg, 3.41 mmol) and  $\text{PdCl}_2(\text{dppf})\cdot\text{CH}_2\text{Cl}_2$  (139 mg, 0.171 mmol) in 1,4-dioxane (2.0 mL) and water (0.2 mL) was stirred overnight at 90 °C. Then mixture was diluted with water (100 mL) and extracted with ethyl acetate ( $2 \times 40$  mL). The combined organic layer was washed with brine (20 mL), dried with  $\text{Na}_2\text{SO}_4$ , filtered and concentrated. The crude was purified by column chromatography on silica gel (PE: EA=3:1) to give the title compound (650 mg, 58.3 % yield, together with the isomer) as oil. LCMS: 471  $[\text{M}+\text{H}]^+$ .

**Step 4:** *4-ethoxy-N-(1-(2-methoxyethyl)-5-methyl-1H-pyrazol-4-yl)-7H-pyrrolo-[2,3-d]-pyrimidin-2-amine*. A solution of 4-ethoxy-N-(1-(2-methoxyethyl)-5-methyl-1H-pyrazol-4-yl)-7-tosyl-7H-pyrrolo-[2,3-d]-pyrimidin-2-amine (300 mg, 0.191 mmol, together with the isomer), sodium hydroxide (3 mL, 6.00 mmol, 2M in water) in methanol (15 mL) was stirred at 50 °C for 2 hours. The mixture was concentrated and saturated  $\text{NaHCO}_3$  was added until pH= 8. The mixture was extracted with EtOAc ( $50 \text{ mL} \times 3$ ). The organic layer was dried over  $\text{Na}_2\text{SO}_4$ , filtered and concentrated. The crude was purified by chromatography on silica gel (DCM: MeOH = 20:1) to give the title compound (25 mg, 0.079 mmol, 17.71 % yield) as a white solid. LCMS: 316.9  $[\text{M}+\text{H}]^+$ .  $t_R$  = 1.25 mins (LCMS condition 2).  $^1\text{H}$  NMR (400MHz,  $\text{CDCl}_3$ ):  $\delta$  10.05 - 10.33 (m, 1H), 7.64 (s, 1H), 6.41 (br. s., 1H), 6.25 - 6.34 (m, 1H), 6.12 (s, 1H), 4.49 (q,  $J$  = 7.2 Hz, 2H), 4.11 (t,  $J$  = 5.6 Hz, 2H), 3.66 (t,  $J$  = 5.6 Hz, 2H), 3.25 (s, 3H), 2.21 (s, 3H), 1.44 (t,  $J$  = 7.2 Hz, 3H).  $^{13}\text{C}$  NMR (101 MHz,

DMSO-*d*<sub>6</sub>):  $\delta$  162.8, 157.8, 155.2, 134.7, 120.5, 120.1, 98.5, 97.9, 71.4, 61.4, 58.6, 48.9, 15.1, 9.3. HRMS (ESI): *m/z* calcd for C<sub>15</sub>H<sub>20</sub>N<sub>6</sub>O<sub>2</sub> [M+H]<sup>+</sup> 317.1726, found [M+H]<sup>+</sup> 317.1731.

**Synthesis of 4-ethoxy-*N*-(1-(2-fluoroethyl)-5-methyl-1*H*-pyrazol-4-yl)-7*H*-pyrrolo-[2,3-*d*]-pyrimidin-2-amine (15)**

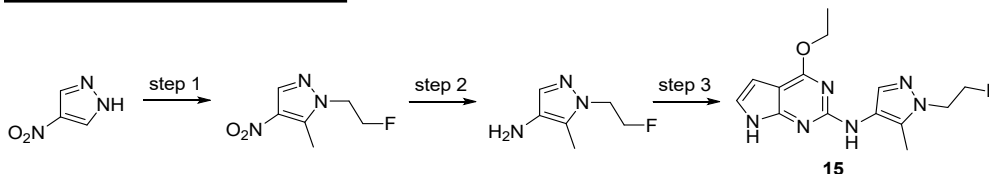

**Step 1:** *1-(2-fluoroethyl)-5-methyl-4-nitro-1H-pyrazole*. A solution of 5-methyl-4-nitro-1*H*-pyrazole (2.0 g, 15.74 mmol), 1-bromo-2-fluoroethane (2.197 g, 17.31 mmol) and Cs<sub>2</sub>CO<sub>3</sub> (10.25 g, 31.5 mmol) in acetonitrile (100 mL) was stirred overnight at 60 °C. The mixture was filtered and the solution was concentrated in vacuo to give the mixture of the title compound (1.05 g, 38.2 % yield, not pure) as yellow oil. LCMS: 174 [M+H]<sup>+</sup>.

**Step 2:** *1-(2-fluoroethyl)-5-methyl-1H-pyrazol-4-amine*. A solution of the mixture of 1-(2-fluoroethyl)-5-methyl-4-nitro-1*H*-pyrazole and Pd/C (100 mg, 0.940 mmol) in methanol (20 mL) was stirred under hydrogen at room temperature for 2 hours. The crude was then filtered and the solution was concentrated to give the mixture of the title compound (201 mg, 50 % yield, not pure) as yellow oil. LCMS: 144 [M+H]<sup>+</sup>.

**Step 3:** *4-ethoxy-*N*-(1-(2-fluoroethyl)-5-methyl-1H-pyrazol-4-yl)-7*H*-pyrrolo-[2,3-*d*]-pyrimidin-2-amine*. A solution of 2-chloro-4-ethoxy-7*H*-pyrrolo[2,3-*d*]pyrimidine (200 mg, 1.012 mmol), 1-(2-fluoroethyl)-5-methyl-1*H*-pyrazol-4-amine (200 mg, 0.838 mmol, not pure), Pd<sub>2</sub>(dba)<sub>3</sub> (46.3 mg, 0.051 mmol), Xtanphos and K<sub>2</sub>CO<sub>3</sub> (280 mg, 2.024 mmol) in 2-butanol (10 mL) was irradiated by microwave at 100 °C for 2 hours. Then water (100 mL) was added and the aqueous phase was extracted with ethyl acetate (50 mL×3). The combined organic layer was washed with brine (20 mL), dried with Na<sub>2</sub>SO<sub>4</sub>, filtered and concentrated. The crude was purified by chromatography on silica gel (PE: EA=1:3) and further purified via Biotage (2M NH<sub>4</sub>OH in Methanol; 40+M Biotage column) to give the title compound (35 mg, 11.36 % yield) as a white solid. LCMS: 305 [M+H]<sup>+</sup>. *t*<sub>R</sub> = 1.263 mins. (LCMS condition 2) <sup>1</sup>H NMR (400MHz, CDCl<sub>3</sub>):  $\delta$  9.70 (br. s., 1H), 7.70 (s, 1H), 6.44 - 6.58 (m, 1H), 6.28 - 6.40 (m, 1H), 6.09 (s, 1H), 4.76 (t, *J* = 4.8 Hz, 1H), 4.64 (t, *J* = 4.8 Hz, 1H), 4.49 (q, *J* = 7.2 Hz, 2H), 4.26 - 4.34 (m, 1H), 4.14 - 4.25 (m, 1H), 2.18 - 2.28 (m, 3H), 1.43 (t, *J* = 7.2 Hz, 3H). <sup>13</sup>C NMR (101 MHz, DMSO-*d*<sub>6</sub>):  $\delta$  162.8, 157.8, 155.2, 135.1, 131.7, 120.8, 120.2, 98.5, 98.0, 83.0, 61.4, 49.6, 15.1, 9.3. HRMS (ESI): *m/z* calcd for C<sub>14</sub>H<sub>17</sub>N<sub>6</sub>O [M+H]<sup>+</sup> 305.1526, found [M+H]<sup>+</sup> 305.1520.

**Synthesis of 1-(4-((4-ethoxy-7*H*-pyrrolo-[2,3-*d*]pyrimidin-2-yl)amino)-5-methyl-1*H*-pyrazol-1-yl)-2-methylpropan-2-ol (16)**

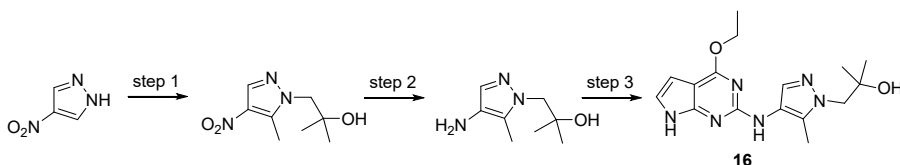

**Step 1:** *2-methyl-1-(5-methyl-4-nitro-1H-pyrazol-1-yl)propan-2-ol*. To a solution of 3-methyl-4-nitro-1H-pyrazole (1.0 g, 7.87 mmol) in acetonitrile (10 mL) was added 2,2-dimethyloxirane (1.702 g, 23.60 mmol) and DBU (2.372 mL, 15.74 mmol). The reaction was stirred at 60 °C for 20 hrs. The mixture was concentrated and the residue dissolved in ethyl acetate and washed with 1 N HCl, water and brine. The organic layer was dried over Na<sub>2</sub>SO<sub>4</sub>, filtered and concentrated. The crude was purified by column chromatography on silica gel (DCM: MeOH=20:1) to give the title compound (800 mg, 51.0 % yield, together with the isomer). LCMS: 200.1 [M+H]<sup>+</sup>.

**Step 2:** *1-(4-amino-3-methyl-1H-pyrazol-1-yl)-2-methylpropan-2-ol*. To a solution of 2-methyl-1-(3-methyl-4-nitro-1H-pyrazol-1-yl)propan-2-ol (800 mg, 4.02 mmol, together with the isomer) in ethanol (50 mL) was added Pd/C (85 mg, 0.080 mmol) under N<sub>2</sub>. The mixture was stirred overnight under H<sub>2</sub> at room temperature. The suspension was filtered through a pad of Celite and the pad was washed with EtOH (10 mL×3). The combined filtrates were concentrated. The crude was purified by column chromatography on silica gel (DCM: MeOH=20:1) to give the title compound (650 mg, 96 % yield, together with the isomer). LCMS: 170.2 [M+H]<sup>+</sup>.

**Step 3:** *1-(4-((4-ethoxy-7H-pyrrolo[2,3-d]pyrimidin-2-yl)amino)-5-methyl-1H-pyrazol-1-yl)-2-methylpropan-2-ol*. A solution of 2-chloro-4-ethoxy-7H-pyrrolo[2,3-d]pyrimidine (200 mg, 1.012 mmol), 1-(4-amino-5-methyl-1H-pyrazol-1-yl)-2-methylpropan-2-ol (206 mg, 1.214 mmol, together with the isomer), Pd<sub>2</sub>(dba)<sub>3</sub> (46.3 mg, 0.051 mmol), Xtanphos (58.6 mg, 0.101 mmol) and K<sub>2</sub>CO<sub>3</sub> (420 mg, 3.04 mmol) in 2-butanol (2.0 mL) was irradiated by microwave at 120 °C for 45 min. The reaction mixture was quenched with water and extracted with EtOAc (20 mL×3). The combined organic layer was dried over Na<sub>2</sub>SO<sub>4</sub>, filtered and concentrated in vacuo. The crude was purified by column chromatography on silica gel (DCM: MeOH=20:1) to get a mixture, which was further purified by chiral-HPLC (Co-Solvent MeOH (0.1%DEA); Column AY-H (4.6\*250mm, 5μm); Column Temperature 40; CO<sub>2</sub> Flow Rate 2.4; Co-Solvent Flow Rate 0.6; Co-Solvent % 20; Back Pressure 120; Total Flow 31; PDA Start Wavelength 214; PDA Stop Wavelength 359) to give the title compound (20 mg, 5.76 % yield) as grey solids. The structure was determined by NOE effect between methyl group on position 5 of pyrazole (CH<sub>3</sub>, 2.23 ppm) and methylene group on position N1 of pyrazole (CH<sub>2</sub>, 3.96 ppm). LCMS: 331.1 [M+H]<sup>+</sup>, t<sub>R</sub>=1.31 min (LCMS condition 2). <sup>1</sup>H NMR(400MHz, CDCl<sub>3</sub>): δ 9.04 (s, 1H), 7.75 (s, 1H), 6.71 (d, J = 4.0 Hz, 1H), 6.41 (d, J = 4.4 Hz, 1H), 6.15 (s, 1H), 4.50 (dd, J = 9.2 Hz, 9.2 Hz, 2H), 3.96 (s, 2H), 2.23 (s, 3H), 1.89 (s, 1H), 1.45 (t, J = 9.2 Hz, 3H), 1.20 (s, 6H). <sup>13</sup>C NMR (101 MHz, DMSO-*d*<sub>6</sub>): δ 162.8, 157.8, 155.2, 134.3, 132.2, 120.5, 120.1, 98.5, 97.9, 70.8, 61.4, 59.2, 28.0, 15.1, 10.0. HRMS (ESI): m/z calcd for C<sub>16</sub>H<sub>22</sub>N<sub>6</sub>O<sub>2</sub> [M+H]<sup>+</sup> 331.1882, found [M+H]<sup>+</sup> 331.1890.



**Synthesis of 2-(4-((4-ethoxy-7H-pyrrolo-[2,3-d]pyrimidin-2-yl)amino)-5-methyl-1H-pyrazol-1-yl)-2-methylpropan-1-ol (17)**

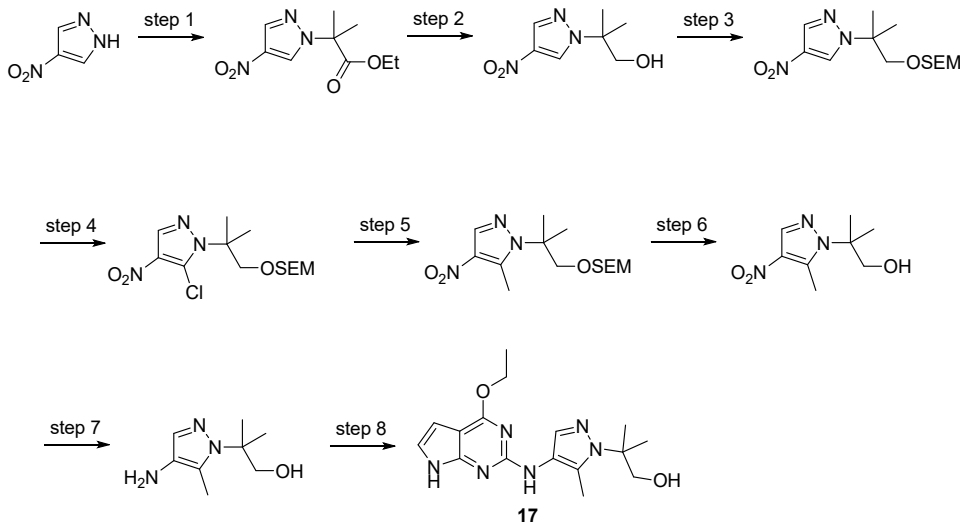

**Step 1:** *ethyl 2-methyl-2-(4-nitro-1H-pyrazol-1-yl)propanoate*. A mixture of 4-nitro-1H-pyrazole (10.0 g, 8.85 mmol), ethyl 2-bromo-2-methylpropanoate (20.7 g, 10.6 mmol) and  $K_2CO_3$  (24.4 g, 177 mmol) in DMF (100 mL) was stirred at 80 °C for 2 hours. The mixture was filtered through a Celite pad and the filtrate was concentrated. The residue was diluted with EtOAc (300 mL), then washed with brine (100 mL), dried over  $Na_2SO_4$ , filtered and concentrated in vacuo. The crude was purified by column chromatography on silica gel (PE: EA = 15:1 to 8:1) to give the title compound (16.7 g, 83% yield) as yellow oil.  $^1H$  NMR (400 MHz,  $CDCl_3$ ):  $\delta$  8.31 (s, 1H), 8.06 (s, 1H), 4.18 (q,  $J$  = 7.2 Hz, 2H), 1.86 (s, 6H), 1.20 (t,  $J$  = 7.2 Hz, 3H).

**Step 2:** *2-methyl-2-(4-nitro-1H-pyrazol-1-yl)propan-1-ol*. To a solution of ethyl 2-methyl-2-(4-nitro-1H-pyrazol-1-yl)propanoate (17.0 g, 74.8 mmol) in THF (50 mL) and water (3 mL) was added  $NaBH_4$  (5.66 g, 150 mmol) at 0 °C. The reaction was stirred at room temperature for 2 hours. The mixture was quenched with aq.  $NaHCO_3$  and extracted with DCM (20 mL $\times$ 3). The combined extracts were dried over  $Na_2SO_4$ , filtered and concentrated in vacuum. The crude was purified by column chromatography on silica gel (DCM: MeOH=20:1) to give the title compound (10.0 g, 72.2 % yield). LCMS: 186  $[M+H]^+$ .  $^1H$  NMR (300 MHz,  $DMSO-d_6$ ):  $\delta$  8.79 (s, 1H), 8.26 (s, 1H), 5.09 (t,  $J$  = 9.2 Hz, 1H), 3.57 (d,  $J$  = 9.2 Hz, 2H), 1.48 (s, 6H).

**Step 3:** *1-(2-methyl-1-((2-(trimethylsilyl)ethoxy)methoxy)propan-2-yl)-4-nitro-1H-pyrazole*. A solution of 2-methyl-2-(4-nitro-1H-pyrazol-1-yl)propan-1-ol (2 g, 10.80 mmol) and NaH (0.864 g, 21.60 mmol) in DMF (30 mL) was stirred in an ice-bath for 30 min. SEMCI (2.299 mL, 12.96 mmol) was added and then the mixture was stirred at room temperature for 3 hours. The reaction was then quenched with water (100 mL) and extracted with diethyl ether (50 mL $\times$ 3). The organic layer was dried and concentrated. The crude was purified by column chromatography on silica gel (PE: EA=10:1) to give the title compound (1.2 g, 33.5 % yield) as yellow oil. LCMS: 314  $[M+H]^+$ .  $^1H$  NMR (400MHz,

DMSO-*d*<sub>6</sub>):  $\delta$  8.91 (s, 1H), 8.31 (s, 1H), 4.56 (s, 2H), 3.30-3.45 (m, 3H), 2.55 (br. s., 1H), 1.60 (s, 6H), 0.79-0.94 (m, 2H), 0.00 (s, 9H).

**Step 4:** *5-chloro-1-(2-methyl-1-((2-(trimethylsilyl)ethoxy)methoxy)propan-2-yl)-4-nitro-1H-pyrazole*. To a solution of 1-(2-methyl-1-((2-(trimethylsilyl)ethoxy)methoxy)propan-2-yl)-4-nitro-1H-pyrazole (1.2 g, 3.80 mmol) in dry THF (30 mL) stirred under nitrogen at -70 °C was added a solution of LiHMDS (11.41 mL, 11.41 mmol, 1M in THF) dropwise during 20 min. The reaction mixture was stirred at -78 °C for 30 min. A solution of perchloroethane (1.351 g, 5.71 mmol) was added and the mixture was stirred for 1 hour at -78 °C under nitrogen. The mixture was quenched with aq NH<sub>4</sub>Cl. Then the mixture was extracted with EtOAc (2 × 100 mL), washed with brine, dried with Na<sub>2</sub>SO<sub>4</sub>, filtered and concentrated. The crude was purified by column chromatography on silica gel (PE: EA=30:1) to give the title compound (1.2 g, 90 % yield) as a yellow solid. LCMS: 322 [M+H]<sup>+</sup>. <sup>1</sup>H NMR (400MHz, CDCl<sub>3</sub>):  $\delta$  8.13 (s, 1H), 4.58-4.69 (m, 2H), 3.89-3.99 (m, 2H), 3.41-3.59 (m, 2H), 1.70-1.84 (m, 6H), 0.79-0.97 (m, 2H), 0.00 (s, 9H).

**Step 5:** *5-methyl-1-(2-methyl-1-((2-(trimethylsilyl)ethoxy)methoxy)propan-2-yl)-4-nitro-1H-pyrazole*. A solution of 2,4,6-trimethyl-1,3,5,2,4,6-trioxatriborinane (0.897 g, 7.15 mmol), 5-chloro-1-(2-methyl-1-((2-(trimethylsilyl)ethoxy)methoxy)propan-2-yl)-4-nitro-1H-pyrazole (1.0 g, 2.86 mmol), Na<sub>2</sub>CO<sub>3</sub> (0.909 g, 8.57 mmol) and PdCl<sub>2</sub>(dppf)-CH<sub>2</sub>Cl<sub>2</sub> adduct (0.467 g, 0.572 mmol) in 1,4-dioxane (2 mL) and water (0.4 mL) was combined in a thick-walled glass tube and stirred at 90 °C for 40 hours. Then the mixture was diluted with water (100 mL) and extracted with ethyl acetate (100 mL×2). The combined organic phase was washed with brine (20 mL), dried with Na<sub>2</sub>SO<sub>4</sub>, filtered and concentrated. The residue was purified by column chromatography on silica gel (PE: EA=30:1) to give the title compound (530 mg, 56.3 % yield) as yellow oil. LCMS: 330 [M+H]<sup>+</sup>. <sup>1</sup>H NMR (400MHz, CDCl<sub>3</sub>):  $\delta$  8.06 (s, 1H), 4.62 (s, 2H), 3.82 (s, 2H), 3.34-3.56 (m, 2H), 2.71-2.95 (m, 3H), 1.72 (s, 6H), 0.79-0.95 (m, 2H), 0.00 (s, 9H).

**Step 6:** *2-methyl-2-(5-methyl-4-nitro-1H-pyrazol-1-yl)propan-1-ol*. A solution of 5-methyl-1-(2-methyl-1-((2-(trimethylsilyl)ethoxy)methoxy)propan-2-yl)-4-nitro-1H-pyrazole (500 mg, 1.518 mmol) and hydrogen chloride (15 mL, 60.0 mmol, 4M in water) was stirred at room temperature for 5 hours. The mixture was treated with saturated NaHCO<sub>3</sub> solution until the pH = 8. The mixture was then extracted with EtOAc (50 mL×2). The organic layer was dried with Na<sub>2</sub>SO<sub>4</sub>, filtered and concentrated to give the title compound (270 mg, 89 % yield) as brown oil. LCMS: 200 [M+H]<sup>+</sup>. <sup>1</sup>H NMR (400MHz, CDCl<sub>3</sub>):  $\delta$  8.06 (s, 1H), 7.26 (s, 1H), 3.94 (s, 2H), 2.83 (s, 3H), 1.46-1.75 (m, 6H).

**Step 7:** *2-(4-amino-5-methyl-1H-pyrazol-1-yl)-2-methylpropan-1-ol*. A solution of 2-methyl-2-(5-methyl-4-nitro-1H-pyrazol-1-yl)propan-1-ol (260 mg, 1.305 mmol) and Pd/C (290 mg, 2.73 mmol) in methanol (30 mL) was stirred under hydrogen at room temperature for 4 hours. The mixture was then filtered and the solution was concentrated to give the title compound (200 mg, 81 % yield) as brown oil. LCMS: 170 [M+H]<sup>+</sup>. <sup>1</sup>H NMR (400MHz, CDCl<sub>3</sub>):  $\delta$  7.27 (s, 1H), 7.09 (s, 1H), 3.88 (s, 2H), 2.31 (s, 3H), 1.49 (s, 6H).

**Step 8:** *2-(4-((4-ethoxy-7H-pyrrolo[2,3-d]pyrimidin-2-yl)amino)-5-methyl-1H-pyrazol-1-yl)-2-methylpropan-1-ol*. A solution of 2-chloro-4-ethoxy-7H-pyrrolo[2,3-d]pyrimidine (60 mg, 0.304 mmol), 2-(4-amino-5-methyl-1H-pyrazol-1-yl)-2-methylpropan-1-ol (46.2 mg, 0.273 mmol), xantphos (26.4 mg, 0.046 mmol), K<sub>2</sub>CO<sub>3</sub> (84 mg, 0.607 mmol) and Pd<sub>2</sub>(dba)<sub>3</sub>

(27.8 mg, 0.030 mmol) in 2-butanol (2 mL) was irradiated by microwave at 120 °C for 1 hour. The mixture was filtered and concentrated. The crude was then purified by prep-HPLC to give the title compound (30 mg, 0.091 mmol, 29.9 % yield) as a white solid. LCMS: 331 [M+H]<sup>+</sup>.  $t_R$  = 1.16 mins. (LCMS conditions 2) <sup>1</sup>H NMR (400MHz, CDCl<sub>3</sub>):  $\delta$  9.45 (br. s., 1H), 7.61 (s, 1H), 6.48-6.64 (m, 1H), 6.35 (dd,  $J$ =3.2, 2.0 Hz, 1H), 6.04 (s, 1H), 4.42 - 4.59 (m, 3H), 3.89 (br. s., 2H), 2.35 (s, 3H), 1.41 - 1.49 (m, 9H). <sup>13</sup>C NMR (101 MHz, DMSO-*d*<sub>6</sub>):  $\delta$  162.8, 158.0, 155.2, 133.4, 131.7, 121.9, 120.1, 98.5, 97.9, 69.0, 63.6, 61.4, 25.2, 15.1, 12.0.

### **Synthesis of 4-ethoxy-*N*-(5-methyl-1-(2-morpholinoethyl)-1H-pyrazol-4-yl)-7H-pyrrolo-[2,3-*d*]pyrimidin-2-amine (18)**

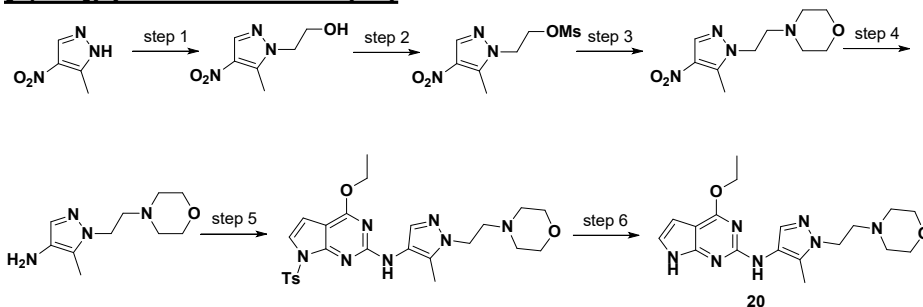

**Step 1:** *2-(5-methyl-4-nitro-1H-pyrazol-1-yl)-ethanol*. To a solution of 3-methyl-4-nitro-1H-pyrazole (2.0g, 15.74 mmol) and 1, 3-dioxolan-2-one (6.93 g, 79 mmol) in acetonitrile (5 mL) was added sodium hydroxide (1.888 g, 47.2 mmol). The reaction mixture was stirred at 80 °C for 15 hours. The mixture was then diluted with water (100 ml) and extracted with EtOAc. The organic layer was dried over Na<sub>2</sub>SO<sub>4</sub>, filtered and concentrated. The crude was purified by pre-HPLC to give the title compound (400 mg, 14.85 % yield) as a white solid. LCMS: 172 [M+H]<sup>+</sup>. <sup>1</sup>H NMR (400MHz, CDCl<sub>3</sub>):  $\delta$  8.11 (s, 1H), 4.17 - 4.26 (m, 2H), 3.99 - 4.13 (m, 2H), 2.77 (br., 1H), 2.68 (s, 3H).

**Step 2:** *2-(5-methyl-4-nitro-1H-pyrazol-1-yl) ethyl-methanesulfonate*. To a solution of 2-(5-methyl-4-nitro-1H-pyrazol-1-yl)-ethanol (200 mg, 1.169 mmol) and DIPEA (0.204 mL, 1.169 mmol) in THF (5 mL) was added hypochlorous methanesulfonic anhydride (0.210 mL, 1.169 mmol). The reaction was then stirred at 0 °C for 30 min. The mixture was diluted with aq. NaHCO<sub>3</sub> (20 mL), extracted with EtOAc. The organic layer was dried and concentrated to give the title compound (300 mg, 81 % yield) as oil. LCMS: 250 [M+H]<sup>+</sup>.

**Step 3:** *4-(2-(5-methyl-4-nitro-1H-pyrazol-1-yl)ethyl)-morpholine*. A solution of 2-(5-methyl-4-nitro-1H-pyrazol-1-yl)ethyl-methanesulfonate (200 mg, 0.802 mmol), morpholine (80 mg, 0.918 mmol) and K<sub>2</sub>CO<sub>3</sub> (381 mg, 2.75 mmol) in acetonitrile (10 mL) was stirred overnight at 80 °C. The mixture was concentrated and purified by column chromatography on silica gel (PE: EA = 1:1) to give the title compound (150 mg, 34.0 % yield) as oil. LCMS: 241 [M+H]<sup>+</sup>. <sup>1</sup>H NMR (400MHz, CDCl<sub>3</sub>):  $\delta$  8.10 (s, 1H), 4.16 - 4.24 (m, 2H), 3.62 - 3.74 (m, 4H), 2.80 (t,  $J$  = 6.4 Hz, 2H), 2.69 (s, 3H), 2.44 - 2.52 (m, 4H).

**Step 4:** *5-methyl-1-(2-morpholinoethyl)-1H-pyrazol-4-amine*. A solution of 4-(2-(5-methyl-4-nitro-1H-pyrazol-1-yl)ethyl)-morpholine (150 mg, 0.624 mmol) and Pd/C (33.2 mg, 0.031 mmol) in methanol (5 mL) was stirred overnight at 20 °C under hydrogen. The

mixture was filtered and the solution was concentrated to give the title compound (100 mg, 76 % yield) as oil. LCMS: 211 [M+H]<sup>+</sup>.

**Step 5:** *4-ethoxy-N-(5-methyl-1-(2-morpholinoethyl)-1H-pyrazol-4-yl)-7-tosyl-7H-pyrrolo[2,3-d]pyrimidin-2-amine*. To a solution of 2-chloro-4-ethoxy-7-tosyl-7H-pyrrolo[2,3-d]pyrimidine (150 mg, 0.426 mmol), 5-methyl-1-(2-morpholinoethyl)-1H-pyrazol-4-amine (100 mg, 0.476 mmol) and Xanphos (37.0 mg, 0.064 mmol) in 1,4-dioxane (2.0 mL) and water (0.2 mL) was added K<sub>2</sub>CO<sub>3</sub> (118 mg, 0.853 mmol) and Pd(dppf)Cl<sub>2</sub> (34.8 mg, 0.043 mmol). The reaction mixture was stirred overnight at 90 °C. The mixture was cooled to room temperature and partitioned between EtOAc (25 mL) and water (20 mL). The organic layer was washed with water (20 mL), dried over Na<sub>2</sub>SO<sub>4</sub> and concentrated. The crude was purified by column chromatography on silica gel (PE: EA=1:1) to give the title compound (70 mg, 25.6 % yield) as a yellow solid. LCMS: 525 [M+H]<sup>+</sup>.

**Step 6:** *4-ethoxy-N-(5-methyl-1-(2-morpholinoethyl)-1H-pyrazol-4-yl)-7H-pyrrolo[2,3-d]pyrimidin-2-amine*. A solution of 4-ethoxy-N-(5-methyl-1-(2-morpholinoethyl)-1H-pyrazol-4-yl)-7-tosyl-7H-pyrrolo[2,3-d]pyrimidin-2-amine (70 mg, 0.133 mmol) and sodium hydroxide (0.2 mL, 0.4 mmol) in isopropanol (2 mL) was stirred overnight at 60 °C. The mixture was concentrated and 2N HCl was added until pH=7. The mixture was then extracted with EtOAc twice. The combined organic layer was dried and evaporated. The crude was purified by prep-HPLC to give the title compound (25 mg, 49.0 % yield) as a white solid. LCMS: 372 [M+H]<sup>+</sup>. t<sub>R</sub> = 1.223 mins. (LCMS condition 2) <sup>1</sup>H NMR (400 MHz, DMSO-*d*<sub>6</sub>): δ 11.17 (br. s., 1H), 7.98 (s, 1H), 7.55 (s, 1H), 6.66 - 6.94 (m, 1H), 6.19 (dd, *J* = 3.3, 1.8 Hz, 1H), 4.42 (q, *J* = 7.0 Hz, 2H), 4.09 (t, *J* = 6.7 Hz, 2H), 3.55 (t, *J* = 4.5 Hz, 4H), 2.56 - 2.73 (m, 2H), 2.41 (br. s., 4H), 2.18 (s, 3H), 1.34 (t, *J* = 7.0 Hz, 3H). <sup>13</sup>C NMR (101 MHz, DMSO-*d*<sub>6</sub>): δ 162.8, 157.8, 155.2, 134.4, 131.0, 120.6, 120.1, 98.5, 97.9, 66.6, 61.4, 58.4, 53.9, 46.8, 15.1, 9.3.

### Synthesis of 4-ethoxy-N-(5-methyl-1-(2-methyl-2-morpholinopropyl)-1H-pyrazol-4-yl)-7H-pyrrolo[2,3-d]pyrimidin-2-amine (19)

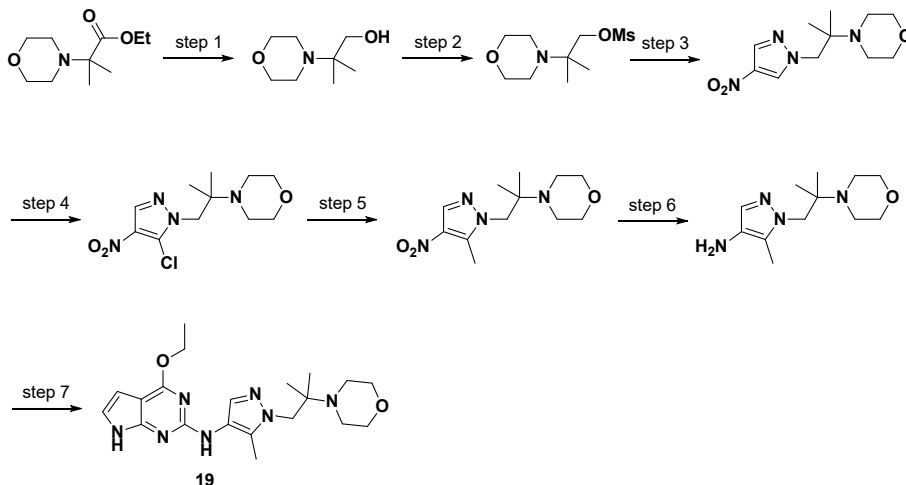

**Step 1:** *2-methyl-2-morpholinopropan-1-ol*. To a solution of ethyl 2-methyl-2-morpholinopropanoate (3.8 g, 18.88 mmol) in THF (30 mL) was added LiAlH<sub>4</sub> (2.87 g, 76

mmol) at 0°C. The reaction mixture was stirred overnight at 25 °C. The reaction was quenched with water and 10% NaOH solution. The mixture was filtered through a pad of Celite and the pad was washed with THF (10 mL). The combined filtrates were concentrated and purified by column chromatography on silica gel (PE: EA=1:2) to give the title compound (2.5 g, 83 % yield). LCMS: 160 [M+H]<sup>+</sup>. <sup>1</sup>H NMR (400 MHz, CDCl<sub>3</sub>): δ 3.72 (m, 4H), 3.33 (s, 2H), 2.55 (m, 4H), 1.03 (s, 6H).

**Step 2:** *2-methyl-2-morpholinopropyl methanesulfonate*. To a solution of 2-methyl-2-morpholinopropan-1-ol (2.2 g, 13.82 mmol) and DIPEA (4.83 mL, 27.6 mmol) in DCM (10 mL) was added methanesulfonyl chloride (1.283 mL, 16.58 mmol) at 0 °C. The reaction was stirred at 0 °C for 2 hours. The mixture was quenched with aqueous NaHCO<sub>3</sub> and extracted with DCM (20 mL×3). The combined extracts were dried over Na<sub>2</sub>SO<sub>4</sub>, filtered and concentrated to give the title compound (3.28 g, 100 % yield).

**Step 3:** *4-(2-methyl-1-(4-nitro-1H-pyrazol-1-yl)propan-2-yl)morpholine*. To a solution of 4-nitro-1H-pyrazole (1.560 g, 13.80 mmol) and 2-methyl-2-morpholinopropyl methanesulfonate (3.27 g, 13.80 mmol) in DMF (10 mL) was added K<sub>2</sub>CO<sub>3</sub> (5.72 g, 41.4 mmol). The reaction was stirred overnight at 90 °C. The mixture was quenched with water and extracted with DCM (20 mL×3). The combined extracts were dried over Na<sub>2</sub>SO<sub>4</sub>, filtered and concentrated. The crude was purified by column chromatography on silica gel (PE: EA=4:1) to give the title compound (1.50 g, 42.7 % yield). LCMS: 255 [M+H]<sup>+</sup>.

**Step 4:** *4-(1-(5-chloro-4-nitro-1H-pyrazol-1-yl)-2-methylpropan-2-yl)morpholine*. To a solution of 4-(2-methyl-1-(4-nitro-1H-pyrazol-1-yl)propan-2-yl)morpholine (1.50 g, 5.90 mmol) in THF (100 mL) was added LiHMDS (1M in THF, 23.60 mL, 23.60 mmol) at -78 °C under nitrogen. After stirring at -78 °C for 30min, perchloroethane (4.19 g, 17.70 mmol) in THF (100 mL) was added and the mixture was stirred for another 2 hours at -78 °C under nitrogen. The reaction was quenched with aq. NH<sub>4</sub>Cl. The mixture was extracted with EA (100 mL×2), washed with brine, dried with Na<sub>2</sub>SO<sub>4</sub>, filtered and concentrated. The crude was purified by column chromatography on silica gel (PE: EA =4:1) to give the title compound (1.1 g, 53.4 % yield) as yellow oil. LCMS: 289 [M+H]<sup>+</sup>. <sup>1</sup>H NMR (400 MHz, DMSO-*d*<sub>6</sub>): δ 8.18 (s, 1H), 4.17 (s, 2H), 3.70 (m, 4H), 2.66 (m, 4H), 1.11 (s, 6H).

**Step 5:** *4-(2-methyl-1-(5-methyl-4-nitro-1H-pyrazol-1-yl)propan-2-yl)morpholine*. A solution of 4-(1-(5-chloro-4-nitro-1H-pyrazol-1-yl)-2-methylpropan-2-yl)morpholine (1.1 g, 3.81 mmol), methylboronic acid (0.684 g, 11.43 mmol), Na<sub>2</sub>CO<sub>3</sub> (1.211 g, 11.43 mmol) and PdCl<sub>2</sub>(dppf)-CH<sub>2</sub>Cl<sub>2</sub> adduct (0.311 g, 0.381 mmol) in 1,4-dioxane (3 mL) and water (0.3 mL) was stirred under at 80 °C for 12 hours. Solvent was evaporated and the crude was directly purified via column chromatography on silica gel (PE: EA=4: 1) to give the title compound (800 mg, 74.3 % yield). LCMS: 269 [M+H]<sup>+</sup>. <sup>1</sup>H NMR (400 MHz, CDCl<sub>3</sub>): δ 8.07 (s, 1H), 4.06 (s, 2H), 3.69 (m, 4H), 2.68 (s, 3H), 2.63 (m, 4H), 1.06 (s, 6H).

**Step 6:** *5-methyl-1-(2-methyl-2-morpholinopropyl)-1H-pyrazol-4-amine*. A solution of 4-(2-methyl-1-(5-methyl-4-nitro-1H-pyrazol-1-yl)propan-2-yl)morpholine (800 mg, 2.98 mmol) and Pd/C (79 mg, 0.075 mmol) in methanol (10 mL) was stirred overnight under hydrogen. The mixture was filtered and the solution was evaporated to give the title compound (600 mg, 82 % yield) as yellow oil. LCMS: 239 [M+H]<sup>+</sup>. <sup>1</sup>H NMR (400 MHz, CDCl<sub>3</sub>): δ 7.15 (s, 1H), 3.94 (s, 2H), 3.71 (m, 4H), 2.63 (m, 6H), 2.19 (s, 3H), 1.03 (s, 6H).

**Step 7:** 4-ethoxy-N-(5-methyl-1-(2-methyl-2-morpholinopropyl)-1H-pyrazol-4-yl)-7H-pyrrolo[2,3-d]pyrimidin-2-amine. A solution of 2-chloro-4-ethoxy-7H-pyrrolo[2,3-d]pyrimidine (100 mg, 0.506 mmol), 5-methyl-1-(2-methyl-2-morpholinopropyl)-1H-pyrazol-4-amine (145 mg, 0.607 mmol), X-phos (18.09 mg, 0.038 mmol), K<sub>2</sub>CO<sub>3</sub> (210 mg, 1.518 mmol) and Pd<sub>2</sub>(dba)<sub>3</sub> (24.12 mg, 0.051 mmol) in 2-butanol (2 mL) was irradiated by microwave at 120 °C for 45 min. The mixture was filtered and concentrated. The crude was then purified by prep-HPLC to give the title compound (105 mg, 51.9 % yield) as a white solid. LCMS: 400 [M+H]<sup>+</sup>. t<sub>R</sub> = 1.28 mins (LCMS conditions 2). <sup>1</sup>H NMR (300 MHz, CDCl<sub>3</sub>): δ 11.20 (s, 1H), 8.00 (s, 1H), 7.57 (s, 1H), 6.86 (d, J=3.5 Hz, 1H), 6.21 (d, J=3.5 Hz, 1H), 4.42 (dd, J=9.0 Hz, 2H), 3.97 (s, 2H), 3.57 (m, 4H), 2.58 (m, 4H), 2.19 (s, 3H), 1.34 (t, J=9.0 Hz, 3H), 0.97 (s, 6H). <sup>13</sup>C NMR (101 MHz, DMSO-d<sub>6</sub>): δ 162.8, 157.8, 155.2, 134.4, 132.1, 120.5, 120.1, 98.5, 97.9, 67.5, 61.3, 58.3, 55.5, 46.6, 22.3, 15.1, 10.2.

**Synthesis of 4-ethoxy-N-(5-methyl-1-(2-methyl-1-morpholinopropan-2-yl)-1H-pyrazol-4-yl)-7H-pyrrolo[2,3-d]pyrimidin-2-amine (20)**

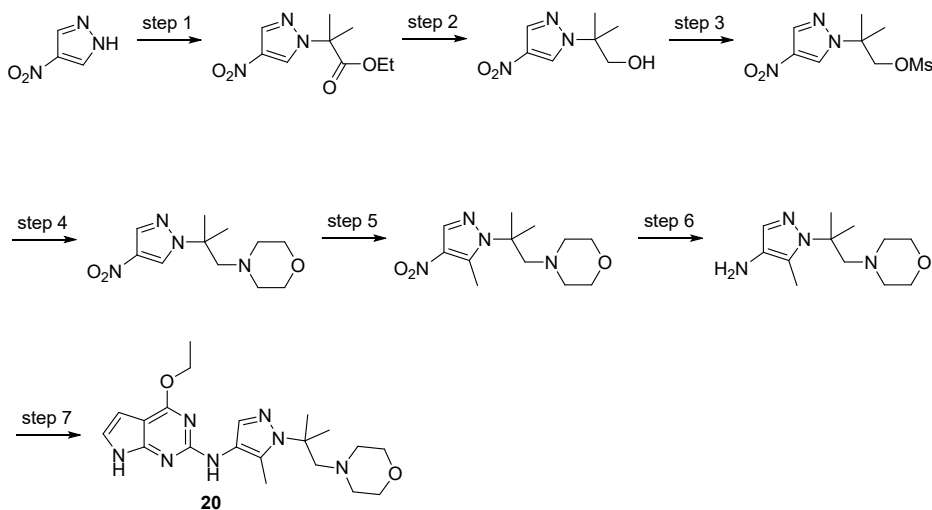

**Step 1: ethyl 2-methyl-2-(4-nitro-1H-pyrazol-1-yl)propanoate.** A mixture of 4-nitro-1H-pyrazole (10.0 g, 8.85 mmol), ethyl 2-bromo-2-methylpropanoate (20.7 g, 10.6 mmol) and K<sub>2</sub>CO<sub>3</sub> (24.4 g, 177 mmol) in DMF (100 mL) was stirred at 80 °C for 2 hours. The mixture was filtered through a Celite pad and the filtrate was concentrated. The residue was diluted with EtOAc (300 mL), then washed with brine (100 mL), dried over Na<sub>2</sub>SO<sub>4</sub>, filtered and concentrated in vacuo. The crude was purified by column chromatography on silica gel (PE: EA = 15:1 to 8:1) to give the title compound (16.7 g, 83% yield) as yellow oil. <sup>1</sup>H NMR (400 MHz, CDCl<sub>3</sub>): δ 8.31 (s, 1H), 8.06 (s, 1H), 4.18 (q, J = 7.2 Hz, 2H), 1.86 (s, 6H), 1.20 (t, J = 7.2 Hz, 3H).

**Step 2: 2-methyl-2-(4-nitro-1H-pyrazol-1-yl)propan-1-ol.** To a solution of ethyl 2-methyl-2-(4-nitro-1H-pyrazol-1-yl)propanoate (17.0 g, 74.8 mmol) in THF (50 mL) and water (3 mL) was added NaBH<sub>4</sub> (5.66 g, 150 mmol) at 0 °C. The reaction was stirred at room temperature for 2 hours. The mixture was quenched with aq. NaHCO<sub>3</sub> and extracted with DCM (20 mL×3). The combined extracts were dried over Na<sub>2</sub>SO<sub>4</sub>, filtered and

concentrated in vacuum. The crude was purified by column chromatography on silica gel (DCM: MeOH=20:1) to give the title compound (10.0 g, 72.2 % yield). LCMS: 186 [M+H]<sup>+</sup>. <sup>1</sup>H NMR (300 MHz, DMSO-*d*<sub>6</sub>): δ 8.79 (s, 1H), 8.26 (s, 1H), 5.09 (t, *J*= 9.2 Hz, 1H), 3.57 (d, *J*= 9.2 Hz, 2H), 1.48 (s, 6H).

**Step 3:** *2-methyl-2-(4-nitro-1H-pyrazol-1-yl)propyl methanesulfonate*. To a solution of 2-methyl-2-(4-nitro-1H-pyrazol-1-yl)propan-1-ol (5 g, 27.0 mmol) and DIPEA (9.43 mL, 54.0 mmol) in DCM (100 mL) at 0 °C was added a solution of MsCl (2.95 mL, 37.8 mmol) in DCM (10 mL) dropwise. The reaction was stirred at room temperature for 1 hour. Satur. NaHCO<sub>3</sub> solution was added and the mixture was extracted with DCM (100 mL×3). The combined organic layers were dried over Na<sub>2</sub>SO<sub>4</sub> and concentrated to give the title compound (6.2 g, 81 % yield) as a yellow solid. LCMS: 264 [M+H]<sup>+</sup>.

**Step 4:** *4-(2-methyl-2-(4-nitro-1H-pyrazol-1-yl)propyl)morpholine*. A mixture of 2-methyl-2-(4-nitro-1H-pyrazol-1-yl)propyl methanesulfonate (6.2 g, 23.55 mmol) and morpholine (30 mL, 23.55 mmol) was stirred at 135 °C for 7 days. Then water (150 mL) was added and the aqueous phase was extracted with EA (100 mL×2). The combined organic phase was washed with brine (50 mL), dried over Na<sub>2</sub>SO<sub>4</sub> and concentrated. The crude was purified by column chromatography on silica gel (PE: EA=10:1) to give the title compound (3.7 g, 61.8 % yield) as a yellow solid. LCMS: 255 [M+H]<sup>+</sup>.

**Step 5:** *4-(2-methyl-2-(5-methyl-4-nitro-1H-pyrazol-1-yl)propyl)morpholine*. To a solution of 4-(2-methyl-2-(4-nitro-1H-pyrazol-1-yl)propyl)morpholine (1g, 3.93 mmol) in THF(100 mL) was added LiHMDS (1M in THF) (1.974 g, 11.80 mmol) at -70 °C under nitrogen. After stirring at -70 °C for 30min, iodomethane (1.675 g, 11.80 mmol) was added and the mixture was stirred for 30 min at -78 °C under nitrogen. The reaction was quenched with aq. NH<sub>4</sub>Cl. Then the mixture was extracted with EA, washed with brine, dried over Na<sub>2</sub>SO<sub>4</sub>, filtered and concentrated. The crude was purified by prep-HPLC to give the title compound (100 mg, 0.373 mmol, 9.48 % yield) as a white solid. LCMS: 269 [M+H]<sup>+</sup>.

**Step 6:** *5-methyl-1-(2-methyl-1-morpholinopropan-2-yl)-1H-pyrazol-4-amine*. A solution of 4-(2-methyl-2-(5-methyl-4-nitro-1H-pyrazol-1-yl)propyl)morpholine (100 mg, 0.373 mmol) and Pd/C (70 mg, 0.658 mmol) in methanol (30 mL) was stirred overnight under hydrogen. The mixture was filtered with diatomite and the solution was evaporated to give the title compound (70 mg, 79 % yield) as oil. LCMS: 239 [M+H]<sup>+</sup>.

**Step 7:** *4-ethoxy-N-(5-methyl-1-(2-methyl-1-morpholinopropan-2-yl)-1H-pyrazol-4-yl)-7H-pyrrolo[2,3-d]pyrimidin-2-amine*. A solution of 2-chloro-4-ethoxy-7H-pyrrolo[2,3-d]pyrimidine (50 mg, 0.253 mmol), 5-methyl-1-(2-methyl-1-morpholinopropan-2-yl)-1H-pyrazol-4-amine (70 mg, 0.294 mmol), X-phos (14.64 mg, 0.025 mmol), K<sub>2</sub>CO<sub>3</sub> (69.9 mg, 0.506 mmol) and Pd<sub>2</sub>(dba)<sub>3</sub> (23.17 mg, 0.025 mmol) in 2-butanol (1.5 mL) was irradiated by microwave at 120 °C for 45 min. The mixture was filtered and concentrated. The crude was then purified by prep-HPLC to give the title compound (45 mg, 44.5 % yield) as a white solid. LCMS: 400 [M+H]<sup>+</sup>. *t*<sub>R</sub> =1.75 mins.(LCMS conditions 2) <sup>1</sup>H NMR (400 MHz, CDCl<sub>3</sub>): δ 7.63 (s, 1H), 6.56 (br. s., 1H), 6.34 (dd, *J*= 2.0, 3.2 Hz, 1H), 6.02 (s, 1H), 4.48 (q, *J*=7.2 Hz, 2H), 3.51-3.67 (m, 4H), 2.60 (s, 2H), 2.43 (s, 3H), 2.18-2.30 (m, 4H), 1.61 (s, 6H), 1.43 (t, *J*=7.2 Hz, 3H). <sup>13</sup>C NMR (101 MHz, DMSO-*d*<sub>6</sub>): δ 162.8, 158.1, 155.2, 133.7, 132.5, 121.9, 120.1, 98.5, 97.9, 68.0, 67.0, 63.7, 61.3, 55.1, 26.8, 15.1, 12.5.

**Synthesis of *trans*-4-ethoxy-N-(1-(3-fluoro-1-methylpiperidin-4-yl)-5-methyl-1H-pyrazol-4-yl)-7H-pyrrolo[2,3-d]pyrimidin-2-amine (21 and 22)**

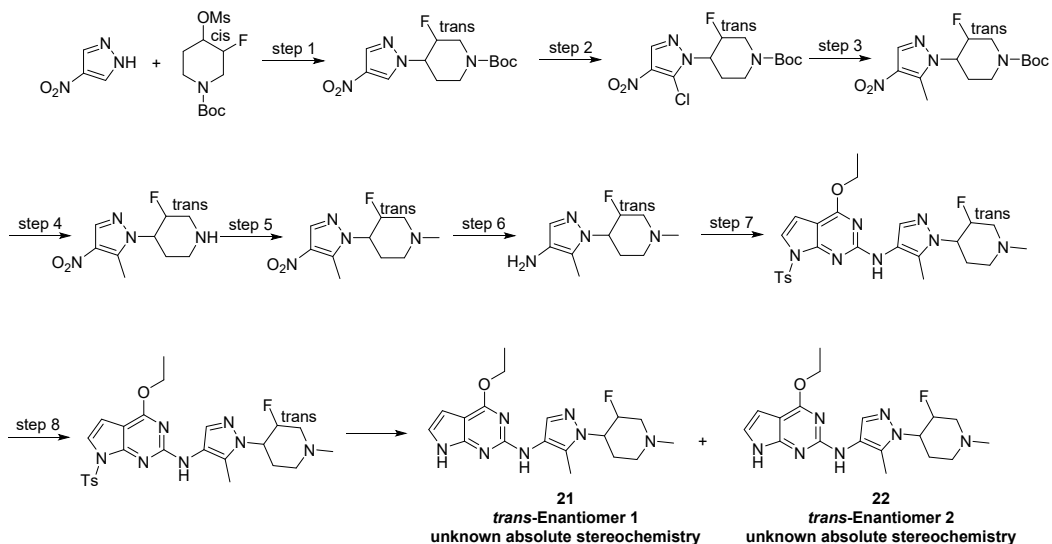

**Step 1:** *tert*-butyl 3-fluoro-4-(4-nitro-1H-pyrazol-1-yl)piperidine-1-carboxylate. To a solution of *tert*-butyl 3-fluoro-4-((methylsulfonyl)oxy)piperidine-1-carboxylate (14.93 g, 50.2 mmol) (which may be prepared according to PCT Int. Appl., 2012062783) in DMF (25.0 mL) was added K<sub>2</sub>CO<sub>3</sub> (13.88 g, 100 mmol) and 4-nitro-1H-pyrazole (5.68 g, 50.2 mmol). The reaction mixture was stirred at 90 °C for overnight. The reaction mixture was quenched with water and extracted with DCM (20 mL × 3). The combined organic layers were dried over Na<sub>2</sub>SO<sub>4</sub>, filtered and concentrated in vacuo. The crude was purified by column chromatography on silica gel (PE: EA=4: 1) to give the title compound (10.0 g, 31.2 mmol, 62.1 % yield) as yellow oil. LCMS: 259.1 [M-56+H]<sup>+</sup>. t<sub>R</sub> = 1.45 mins. (LCMS condition 2)

**Step 2:** *tert*-butyl 4-(5-chloro-4-nitro-1H-pyrazol-1-yl)-3-fluoropiperidine-1-carboxylate. To a solution of *tert*-butyl 3-fluoro-4-(4-nitro-1H-pyrazol-1-yl)piperidine-1-carboxylate (which may be prepared according to D103) (10.0 g, 31.8 mmol) in dry THF (50.0 mL) under nitrogen at -70 °C was added lithium bis(trimethylsilyl)amide (127 mL, 127 mmol, 1M in THF) dropwise during 15 min. The reaction mixture was stirred at -78 °C for 30 min. A solution of perchloroethane (22.60 g, 95 mmol) in dry THF (50.0 mL) was added and the mixture was stirred for 2 hours at -78 °C under nitrogen. The mixture was quenched with aq NH<sub>4</sub>Cl and extracted with EtOAc (2 × 100 mL). The organic layer was dried with Na<sub>2</sub>SO<sub>4</sub>, filtered and concentrated. The crude was purified by chromatography on silica gel (PE: EA=4: 1) to give the title compound (6.0 g, 15.31 mmol, 48.1 % yield) as yellow oil. LCMS: 293 [M-56+H]<sup>+</sup>. t<sub>R</sub> = 1.55 mins. (LCMS condition 2)

**Step 3:** *tert*-butyl 3-fluoro-4-(5-methyl-4-nitro-1H-pyrazol-1-yl)piperidine-1-carboxylate. A solution of methylboronic acid (3.09 g, 51.6 mmol), *tert*-butyl 4-(5-chloro-4-nitro-1H-pyrazol-1-yl)-3-fluoropiperidine-1-carboxylate (6.0 g), PdCl<sub>2</sub>(dppf)-CH<sub>2</sub>Cl<sub>2</sub> adduct (1.405 g, 1.720 mmol) and sodium carbonate (5.47 g, 51.6 mmol) in 1,4-dioxane (30 mL) and water (3.0 mL) was combined in a thick walled glass tube and stirred overnight at 75 °C. The



mixture was poured into water and extracted with DCM (20 mL × 3). The combined organic layers were dried over Na<sub>2</sub>SO<sub>4</sub>, filtered and concentrated in vacuo. The crude was purified by column chromatography on silica (PE: EA=4: 1) to give the title compound (2.0 g, 6.09 mmol, 35.4 % yield) as a yellow solid. LCMS: 273.1 [M-56+H]<sup>+</sup>. t<sub>R</sub>=1.53 mins. (LCMS condition 2)

**Step 4:** *3-fluoro-4-(5-methyl-4-nitro-1H-pyrazol-1-yl)piperidine* A solution of *tert*-butyl 3-fluoro-4-(5-methyl-4-nitro-1H-pyrazol-1-yl)piperidine-1-carboxylate (6.0 g, 18.27 mmol) in DCM (50 mL) was added TFA (14.08 mL, 183 mmol) was stirred at room temperature for 2 hours. The reaction mixture was quenched with aq. NaHCO<sub>3</sub> and extracted with DCM (20 mL ×3). The combined organic layers were dried over Na<sub>2</sub>SO<sub>4</sub>, filtered and concentrated in vacuum. The crude was purified by column chromatography on silica gel (DCM: MeOH =20:1) to give the title compound (4.0 g, 17.53 mmol, 96 % yield) as a yellow solid. LCMS: 229.1 [M+H]<sup>+</sup>. t<sub>R</sub>=1.11 mins. (LCMS condition 2)

**Step 5:** *3-fluoro-1-methyl-4-(5-methyl-4-nitro-1H-pyrazol-1-yl)piperidine*. To a solution of 3-fluoro-4-(5-methyl-4-nitro-1H-pyrazol-1-yl)piperidine (4.0 g, 17.53 mmol) and formaldehyde (1.579 g, 52.6 mmol) in methanol (5.0 mL) was added AcOH (0.100 mL, 1.753 mmol). The reaction was stirred at 65 °C for 2 hours. The reaction mixture was then cooled to 0 °C, sodium triacetoxyborohydride (3.71 g, 17.53 mmol) was added. The reaction was stirred at room temperature for 2 hours. The reaction mixture was quenched with water and extracted with mix solvent of DCM and MeOH (10:1, 20 mL × 3). The combined organic layers were dried over Na<sub>2</sub>SO<sub>4</sub>, filtered and concentrated in vacuo. The crude was purified by column chromatography on silica gel (PE: EA=2: 1) to give the title compound (3.0 g, 12.38 mmol, 70.7 % yield) as a yellow solid. LCMS: 243.1 [M+H]<sup>+</sup>. t<sub>R</sub>=1.47 mins. (LCMS condition 2)

**Step 6:** *1-(3-fluoro-1-methylpiperidin-4-yl)-5-methyl-1H-pyrazol-4-amine* To a solution of 3-fluoro-1-methyl-4-(5-methyl-4-nitro-1H-pyrazol-1-yl)piperidine (3.0 g, 12.38 mmol) in ethanol (10.0 mL) and water (10.0 mL) was added iron (1.383 g, 24.77 mmol) and ammonium chloride (0.331 g, 6.19 mmol). The reaction was stirred overnight at room temperature. The mixture was filtered through a pad of Celite and washed with EtOH (10 mL ×3). The filtrate was concentrated and the crude was purified by column chromatography on silica gel (DCM: MeOH=20:1) to give the title compound (1.5 g, 7.07 mmol, 57.1 % yield) as yellow oil. LCMS: 213.1 [M+H]<sup>+</sup>. t<sub>R</sub>=0.94 mins. (LCMS condition 2)

**Step 7:** *4-ethoxy-N-(1-(3-fluoro-1-methylpiperidin-4-yl)-5-methyl-1H-pyrazol-4-yl)-7-tosyl-7H-pyrrolo-[2,3-d]pyrimidin-2-amine*. A solution of 2-chloro-4-ethoxy-7-tosyl-7H-pyrrolo-[2,3-d]-pyrimidine (180 mg, 0.512 mmol), 1-(3-fluoro-1-methylpiperidin-4-yl)-5-methyl-1H-pyrazol-4-amine (108 mg, 0.512 mmol), K<sub>2</sub>CO<sub>3</sub> (212 mg, 1.535 mmol), X-Phos (73.2 mg, 0.153 mmol) and PdCl<sub>2</sub>(dppf)-CH<sub>2</sub>Cl<sub>2</sub> adduct (84 mg, 0.102 mmol) in 1,4-dioxane (1.50 mL) and water (0.20 mL) under nitrogen was stirred overnight at 90 °C. The reaction mixture was poured into water and extracted with DCM (20 mL × 3). The combined organic layers were dried over Na<sub>2</sub>SO<sub>4</sub>, filtered and concentrated in vacuum. The crude was purified by column chromatography on silica gel (PE: EA=2: 1) to give the title compound (250 mg, 0.256 mmol, 50.1 % yield) as a yellow solid. LCMS: 528.3 [M+H]<sup>+</sup>. t<sub>R</sub>=1.57 mins. (LCMS condition 2)

**Step 8:** *trans*-4-ethoxy-*N*-(1-(3-fluoro-1-methylpiperidin-4-yl)-5-methyl-1*H*-pyrazol-4-yl)-7*H*-pyrrolo[2,3-*d*]pyrimidin-2-amine. A solution of 4-ethoxy-*N*-(1-(3-fluoro-1-methylpiperidin-4-yl)-5-methyl-1*H*-pyrazol-4-yl)-7-tosyl-7*H*-pyrrolo-[2,3-*d*]pyrimidin-2-amine (750 mg, 1.421 mmol) and TBAF (1858 mg, 7.11 mmol, 1M in THF) in THF (10.0 mL) was stirred at 80 °C for 2 hours. The mixture was quenched with aqueous NH<sub>4</sub>Cl and extracted with DCM (20 mL × 3). The combined organic layers were dried over Na<sub>2</sub>SO<sub>4</sub>, filtered and concentrated in vacuum. The residue was purified by column chromatography on silica gel (DCM: MeOH=20:1) to give the mixture (220 mg, 0.554 mmol, 39.0 % yield), which was further purified by chiral-HPLC (Co-Solvent MeOH(0.1%DEA); Column OJ-H (4.6\*250mm, 5μm); Column Temperature 40; CO<sub>2</sub> Flow Rate 2.25; Co-Solvent Flow Rate 0.45; Co-Solvent % 15; Back Pressure 120; Total Flow 3; PDA Start Wavelength 214; PDA Stop Wavelength 359) to give the title compounds **21** (19.0 mg, 0.051 mmol, 8.64 % yield) and **22** (13.6 mg, 0.036 mmol, 6.18 % yield) as white solids.

**21:** LCMS: 374.2 [M+H]<sup>+</sup>. *t<sub>R</sub>* = 1.21 mins. (LCMS condition 2)

Chiral HPLC: *t<sub>R</sub>* = 3.27 mins. (Condition: Column OJ-H (4.6\*250mm, 5μm); (Co-Solvent MeOH) unknown absolute stereochemistry

<sup>1</sup>H NMR (400MHz, CDCl<sub>3</sub>): δ 9.10 (br. s., 1H), 7.77 (s, 1H), 6.54-6.74 (m, 1H), 6.35 (dd, *J*=3.4, 1.9 Hz, 1H), 6.06 (s, 1H), 4.82-5.07 (m, 1H), 4.42-4.54 (m, *J*=7.2, 7.2, 7.2 Hz, 2H), 3.85-4.07 (m, 1H), 3.18-3.37 (m, 1H), 2.79-3.01 (m, 1H), 2.41-2.52 (m, 1H), 2.37 (s, 3H), 2.23 (s, 3H), 2.05-2.19 (m, 2H), 1.91 (dd, *J*=7.5, 5.0 Hz, 1H), 1.42 (t, *J*=7.0 Hz, 3H). <sup>13</sup>C NMR (101 MHz, DMSO-*d*<sub>6</sub>): δ 162.8, 157.7, 155.2, 135.1, 131.7, 120.5, 120.2, 98.5, 98.0, 90.2, 61.4, 59.0, 58.5, 53.9, 45.7, 30.1, 15.1, 9.1.

**22:** LCMS: 374.2 [M+H]<sup>+</sup>. *t<sub>R</sub>* = 1.21 mins. (LCMS condition 2)

Chiral HPLC: *t<sub>R</sub>* = 3.85 mins. (Condition: Column OJ-H (4.6\*250mm, 5μm); (Co-Solvent MeOH) unknown absolute stereochemistry

<sup>1</sup>H NMR (400MHz, CDCl<sub>3</sub>): δ 7.77 (s, 1H), 6.63 (d, *J*=3.0 Hz, 1H), 6.36 (d, *J*=1.8 Hz, 1H), 6.06 (s, 1H), 4.83-5.08 (m, 1H), 4.48 (q, *J*=7.2 Hz, 2H), 3.87-4.05 (m, 1H), 3.21-3.35 (m, 1H), 2.92 (d, *J*=9.8 Hz, 1H), 2.40-2.52 (m, 1H), 2.38 (s, 3H), 2.23 (s, 3H), 2.04-2.20 (m, 2H), 1.92 (dd, *J*=7.8, 5.3 Hz, 1H), 1.42 (t, *J*=7.0 Hz, 3H).

### Synthesis of *trans*-4-ethoxy-*N*-(1-(3-fluoro-1-(2-methoxyethyl) piperidin-4-yl)-5-methyl-1*H*-pyrazol-4-yl)-7*H*-pyrrolo[2,3-*d*]pyrimidin-2-amine (**23** and **24**)

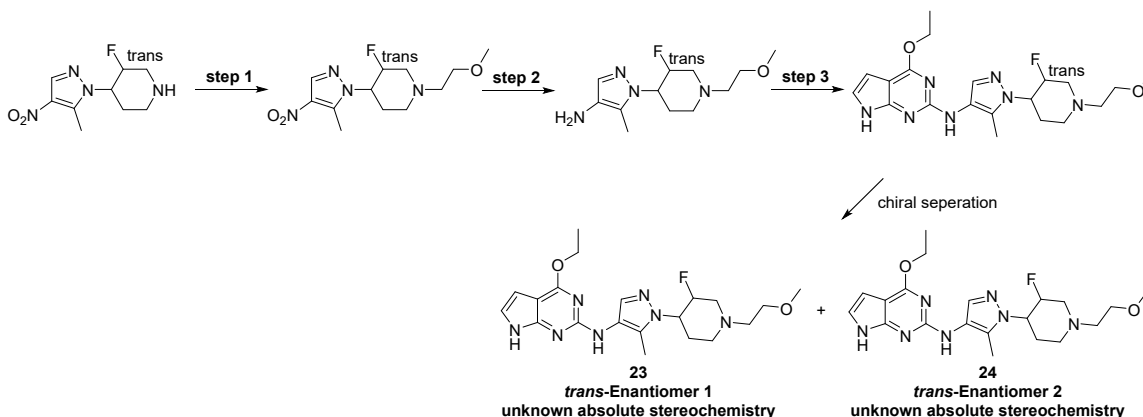

**Step 1:** *trans*-3-fluoro-1-(2-methoxyethyl)-4-(5-methyl-4-nitro-1H-pyrazol-1-yl)piperidine.

To a solution of 3-fluoro-4-(5-methyl-4-nitro-1H-pyrazol-1-yl)piperidine (450 mg, 1.97 mmol) (according to synthesis of **21** and **22**), 1-bromo-2-methoxyethane (820 mg, 6.00 mmol) in DMF (15 mL) was added TEA (800 mg, 8.00 mmol). After stirring at 60 °C overnight, the mixture was poured into water (200 mL) and extracted with EtOAc (150 mL×2). The extracts were dried over Na<sub>2</sub>SO<sub>4</sub> and concentrated. The crude was purified by column on C18 (30~60% CH<sub>3</sub>CN in H<sub>2</sub>O) to give the title compound (500 mg, 83 %) as yellow oil. LC-MS: 287 [M+H]<sup>+</sup>. <sup>1</sup>H NMR (300MHz, CDCl<sub>3</sub>): δ 8.13 (s, 1H), 4.82 - 5.07 (m, 1H), 4.01 - 4.16 (m, 1H), 3.52 (t, *J* = 5.4 Hz, 2H), 3.41 - 3.48 (m, 1H), 3.67 (s, 3H), 3.04 - 3.11 (m, 1H), 2.68 - 2.73 (m, 2H), 2.67 (s, 3H), 2.42 - 2.56 (m, 1H), 2.19 - 2.30 (m, 2H), 1.86 - 1.96 (m, 1H).

**Step 2:** *trans*-1-(3-fluoro-1-(2-methoxyethyl)piperidin-4-yl)-5-methyl-1H-pyrazol-4-amine.

To a solution of *trans*-3-fluoro-1-(2-methoxyethyl)-4-(5-methyl-4-nitro-1H-pyrazol-1-yl)piperidine (500 mg, 1.75 mmol) in MeOH (25 mL) was added Pd/C (10 %, 100 mg). The reaction was stirred at 40 °C for 30 min. The mixture was filtered. The filtrate was concentrated to give the title compound (430 mg, 90%) as colorless oil. LC-MS: 257 [M+H]<sup>+</sup>. <sup>1</sup>H NMR (300 MHz, CDCl<sub>3</sub>): δ 7.21 (s, 1H), 4.82 - 5.06 (m, 1H), 3.87 - 3.98 (m, 1H), 3.52 (t, *J* = 5.4 Hz, 2H), 3.35 - 3.42 (m, 4H), 3.00 - 3.04 (m, 1H), 2.61 - 2.71 (m, 2H), 2.33 - 2.46 (m, 1H), 2.19 - 2.27 (m, 2H), 2.17 (s, 3H), 1.84 - 1.93 (m, 1H).

**Step 3:** *trans*-4-ethoxy-*N*-(1-(3-fluoro-1-(2-methoxyethyl) piperidin-4-yl)-5-methyl-1H-pyrazol-4-yl)-7H-pyrrolo[2,3-*d*]pyrimidin-2-amine. To a solution of 1-(3-fluoro-1-(2-methoxyethyl)piperidin-4-yl)-5-methyl-1H-pyrazol-4-amine (430 mg, 1.68 mmol), **52** (365 mg, 1.85 mmol), xphos (146 mg, 0.310 mmol), K<sub>2</sub>CO<sub>3</sub> (927 mg, 6.72 mmol) in dioxane (15 mL) was added Pd<sub>2</sub>(dba)<sub>3</sub> (154 mg, 0.168 mmol) under N<sub>2</sub> atmosphere. Then the reaction was stirred overnight at reflux. The mixture was filtered and the filtrate was concentrated. The crude was purified by column C18 (30~55% CH<sub>3</sub>CN in H<sub>2</sub>O) to afford desired racemate (350 mg) as yellow solid which was separated by SFC (Instrument Method: 70-30-CO<sub>2</sub>-MeOH, Co-solvent MeOH (0.2dea); column ID, Sample Well 11B, Col.Temp 39.8, CO<sub>2</sub> Flow Rate 2.1, Co-solvent Flow Rate 0.899 Back pressure 100) to give the title compound **23** (53 mg, *t<sub>R</sub>* = 6.819 min) as a yellow solid and **24** (62 mg, *t<sub>R</sub>* = 8.406 min) as a white solid.

**23:** LCMS: 418 [M+H]<sup>+</sup>. *t<sub>R</sub>* = 1.90 min. (LCMS condition 2)

Chiral HPLC: *t<sub>R</sub>* = 6.82 mins. (Condition: column ID, Col.Temp 39.8, CO<sub>2</sub> Flow Rate 2.1) unknown absolute stereochemistry

<sup>1</sup>H NMR (400 MHz, DMSO-*d*<sub>6</sub>): δ 11.22 (br. s., 1H), 8.03 (s, 1H), 7.66 (s, 1H), 6.86 (dd, *J* = 2.0, 3.2 Hz, 1H), 6.21 (dd, *J* = 2.0, 3.6 Hz, 1H), 4.70-5.02 (m, 1H), 4.44 (q, *J* = 7.2 Hz, 2H), 4.22 (dd, *J* = 4.0, 9.2 Hz, 1H), 3.47 (t, *J* = 5.6 Hz, 2H), 3.26 (s, 3H), 2.92 (d, *J* = 9.2 Hz, 1H), 2.62 (t, *J* = 4.8 Hz, 2H), 2.21-2.34 (m, 2H), 2.18 (s, 3H), 2.01-2.14 (m, 1H), 1.79-1.93 (m, 1H), 1.36 (t, *J* = 7.2 Hz, 3H). <sup>13</sup>C NMR (101 MHz, DMSO-*d*<sub>6</sub>): δ 162.8, 157.8, 155.2, 135.2, 131.7, 120.4, 120.2, 98.5, 98.0, 90.5, 70.5, 61.4, 59.3, 58.5, 56.8, 56.7, 52.0, 30.3, 15.1, 9.1. HRMS (ESI): *m/z* calcd for C<sub>20</sub>H<sub>28</sub>FN<sub>7</sub>O<sub>2</sub> [M+H]<sup>+</sup> 418.2367, found [M+H]<sup>+</sup> 418.2361.

**24:** LCMS: 418 [M+H]<sup>+</sup>. *t<sub>R</sub>* = 1.90 min. (LCMS condition 2)

Chiral HPLC: *t<sub>R</sub>* = 8.41 min. (Condition: column ID, Col.Temp 39.8, CO<sub>2</sub> Flow Rate 2.1) unknown absolute stereochemistry

$^1\text{H}$  NMR (400 MHz,  $\text{DMSO}-d_6$ ):  $\delta$  11.22 (br. s., 1H), 8.03 (s, 1H), 7.66 (s, 1H), 6.86 (dd,  $J=2.4$ , 3.2 Hz, 1H), 6.21 (dd,  $J=2.0$ , 3.2 Hz, 1H), 4.66-5.00 (m, 1H), 4.44 (q,  $J=7.2$  Hz, 2H), 4.08-4.31 (m, 1H), 3.48 (t,  $J=5.6$  Hz, 2H), 3.26 (s, 3H), 2.93 (d,  $J=9.2$  Hz, 1H), 2.63 (br. s., 2H), 2.21-2.34 (m, 2H), 2.00-2.14 (m, 1H), 1.78-1.94 (m, 1H), 1.36 (t,  $J=7.2$  Hz, 3H).  $\text{DMSO}-d_6$ :  $\delta$  162.8, 157.8, 155.2, 120.4, 120.2, 98.5, 98.0, 70.5, 61.4, 59.2, 58.5, 56.7, 52.0, 30.2, 15.1, 9.1. HRMS (ESI):  $m/z$  calcd for  $\text{C}_{20}\text{H}_{28}\text{FN}_7\text{O}_2$   $[\text{M}+\text{H}]^+$  418.2367, found  $[\text{M}+\text{H}]^+$  418.2360.

**2.16. (*trans*)-*N*-(1-(1-(cyclopropylmethyl)-3-fluoropiperidin-4-yl)-5-methyl-1*H*-pyrazol-4-yl)-4-ethoxy-7*H*-pyrrolo[2,3-*d*]pyrimidin-2-amine (25 and 26)**

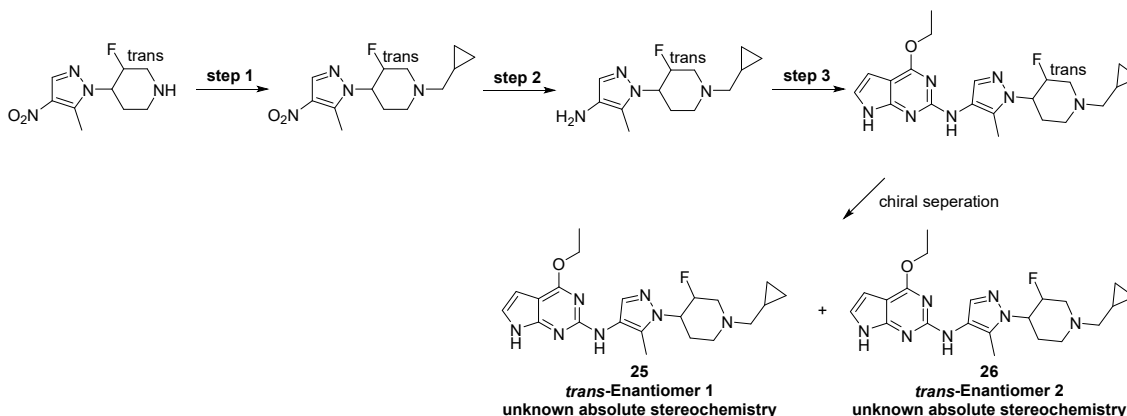

**Step 1:** ( $\pm$ )-(*trans*)-1-(1-(cyclopropylmethyl)-3-fluoro-4-(5-methyl-4-nitro-1*H*-pyrazol-1-yl)piperidine. To a solution of ( $\pm$ )-(*trans*)-3-fluoro-4-(5-methyl-4-nitro-1*H*-pyrazol-1-yl)piperidine (300 mg, 1.32 mmol), cyclopropanecarbaldehyde (230 mg, 3.30 mmol) in 1,2-dichloroethane (15 mL) was added  $\text{NaBH}(\text{OAc})_3$  (840 mg, 3.96 mmol) at room temperature. Then the reaction mixture was stirred at room temperature for 2 hrs. The reaction mixture was poured into 100 mL of saturated  $\text{Na}_2\text{CO}_3$  aqueous and extracted with DCM (100 mL  $\times$  2). The combined extracts were dried over  $\text{Na}_2\text{SO}_4$  and concentrated. The residue was purified by column C18 ( $\text{ACN}/\text{H}_2\text{O}$  = 40-60%) to afford title product (310 mg, 83%) as white solid.  $^1\text{H}$  NMR (300MHz,  $\text{CDCl}_3$ ):  $\delta$  8.14 (s, 1H), 4.83-5.08 (m, 1H), 4.03-4.15 (m, 1H), 3.51-3.57 (m, 1H), 3.14-3.17 (m, 1H), 2.67 (s, 3H), 2.04-2.50 (m, 5H), 1.91-1.95 (m, 1H), 0.83-0.90 (m, 1H), 0.54-0.57 (m, 2H), 0.12-0.14 (m, 2H). LC-MS: 283  $[\text{M}+\text{H}]^+$ .

**Step 2:** ( $\pm$ )-(*trans*)-1-(1-(1-(cyclopropylmethyl)-3-fluoropiperidin-4-yl)-5-methyl-1*H*-pyrazol-4-yl)-4-ethoxy-7*H*-pyrrolo[2,3-*d*]pyrimidin-2-amine. To a solution of ( $\pm$ )-(*trans*)-1-(1-(cyclopropylmethyl)-3-fluoro-4-(5-methyl-4-nitro-1*H*-pyrazol-1-yl)piperidine (310 mg, 1.09 mmol) in 15 mL of MeOH was added Pd/C (10%, 100 mg) and then the mixture was stirred under  $\text{H}_2$  atmosphere for 2 hrs. The reaction mixture was filtered and the filtrate was concentrated to afford the title product (230 mg, 84%) as colorless oil.  $^1\text{H}$  NMR (300MHz,  $\text{CDCl}_3$ ):  $\delta$  7.22 (s, 1H), 4.81-5.06 (m, 1H), 3.86-3.99 (m, 1H), 3.45-3.53 (m, 1H), 3.08-3.11 (m, 1H), 2.37(br s, 2H), 2.27-2.43 (m, 3H), 2.10-2.27 (m, 5H), 1.80-1.94 (m, 1H), 0.83-0.92 (m, 1H), 0.52-0.54 (m, 2H), 0.11-0.12 (m, 2H). LC-MS: 253  $[\text{M}+\text{H}]^+$ .

**Step 2:** (*trans*)-*N*-(1-(1-(cyclopropylmethyl)-3-fluoropiperidin-4-yl)-5-methyl-1*H*-pyrazol-4-yl)-4-ethoxy-7*H*-pyrrolo[2,3-*d*]pyrimidin-2-amine. To a solution of ( $\pm$ )-(*trans*)-1-(1-(cyclopropylmethyl)-3-fluoropiperidin-4-yl)-5-methyl-1*H*-pyrazol-4-amine (230 mg, 0.913 mmol), 2-chloro-4-ethoxy-7*H*-pyrrolo[2,3-*d*]pyrimidine (198 mg, 1.00 mmol), Xphos (79 mg, 0.14 mmol) and K<sub>2</sub>CO<sub>3</sub> (504 mg, 3.65 mmol) in 20 ml of dioxane was added Pd<sub>2</sub>(dba)<sub>3</sub> (83 mg, 0.090 mmol) under N<sub>2</sub> atmosphere. Then the reaction mixture was stirred at 120 °C for overnight. The reaction mixture was cooled to room temperature and filtered. The filtrate was concentrated and the residue was purified by column C18 (CAN/H<sub>2</sub>O = 30-50%) to afford racemate (150 mg) as yellow solid, which was separated by SFC (Instrument Method: 70-30-CO<sub>2</sub>/MeOH, Co-solvent: MeOH (0.2% DEA); column ID: Sample Well 11B; Col.Temp: 39.8; CO<sub>2</sub> Flow Rate: 2.1, Co-solvent Flow Rate: 0.899, Back pressure: 100) to give **25** (13.5 mg, Rt= 4.55 min) as white solid and **26** (15.0 mg, Rt= 5.43 min) as white solids. LC-MS: Rt = 3.23 min; 414 [M+H]<sup>+</sup>.

**25:** (Rt= 4.55 min) 95.35% ee. <sup>1</sup>H NMR (400 MHz, DMSO-*d*<sub>6</sub>):  $\delta$  11.22 (br. s., 1H), 8.03 (s, 1H), 7.66 (s, 1H), 6.86 (dd, *J* = 2.0, 3.2 Hz, 1H), 6.21 (dd, *J* = 2.0, 3.2 Hz, 1H), 4.73-5.01 (m, 1H), 4.44 (d, *J* = 7.2 Hz, 2H), 4.09-4.28 (m, 1H), 3.01 (d, *J* = 10.0 Hz, 1H), 2.27-2.38 (m, 2H), 2.04-2.26 (m, 6H), 1.81-1.95 (m, 1H), 1.36 (t, *J* = 7.2 Hz, 3H), 0.73-0.98 (m, 1H), 0.36-0.58 (m, 2H), 0.11 (d, *J* = 4.0 Hz, 2H). <sup>13</sup>C NMR (101 MHz, DMSO-*d*<sub>6</sub>):  $\delta$  162.8, 157.8, 155.2, 135.1, 120.4, 120.2, 98.5, 98.0, 91.4, 89.7, 62.4, 61.4, 59.5, 56.2, 51.5, 30.2, 15.1, 9.1, 8.6, 4.2, 4.1. HRMS (ESI): *m/z* calcd for C<sub>21</sub>H<sub>28</sub>FN<sub>7</sub>O [M+H]<sup>+</sup> 414.2417, found [M+H]<sup>+</sup> 414.2424.

**26:** (Rt = 5.43 min) 100% ee. <sup>1</sup>H NMR (400 MHz, DMSO-*d*<sub>6</sub>):  $\delta$  11.22 (br. s., 1H), 8.03 (s, 1H), 7.66 (s, 1H), 6.86 (dd, *J* = 2.0, 3.2 Hz, 1H), 6.21 (dd, *J* = 2.0, 3.2 Hz, 1H), 4.72-5.02 (m, 1H), 4.44 (q, *J* = 7.2 Hz, 2H), 4.05-4.32 (m, 1H), 3.01 (d, *J* = 10.0 Hz, 1H), 2.28-2.40 (m, 2H), 2.02-2.26 (m, 6H), 1.80-1.97 (m, 1H), 1.36 (t, *J* = 7.2 Hz, 3H), 1.08-1.28 (m, 1H), 0.78-0.94 (m, 1H), 0.42-0.57 (m, 2H), 0.11 (d, *J* = 4.0 Hz, 2H). <sup>13</sup>C NMR (101 MHz, DMSO-*d*<sub>6</sub>):  $\delta$  162.8, 157.8, 155.2, 120.4, 120.1, 98.5, 98.0, 91.4, 89.7, 62.4, 61.4, 59.5, 56.2, 51.5, 30.2, 15.1, 9.1, 8.6, 4.2, 4.1. HRMS (ESI): *m/z* calcd for C<sub>21</sub>H<sub>28</sub>FN<sub>7</sub>O [M+H]<sup>+</sup> 414.2417, found [M+H]<sup>+</sup> 414.2411.

### Synthesis of (*trans*)-*N*-(1-(1-(cyclopropyl)-3-fluoropiperidin-4-yl)-5-methyl-1*H*-pyrazol-4-yl)-4-ethoxy-7*H*-pyrrolo[2,3-*d*]pyrimidin-2-amine (**27** and **28**)

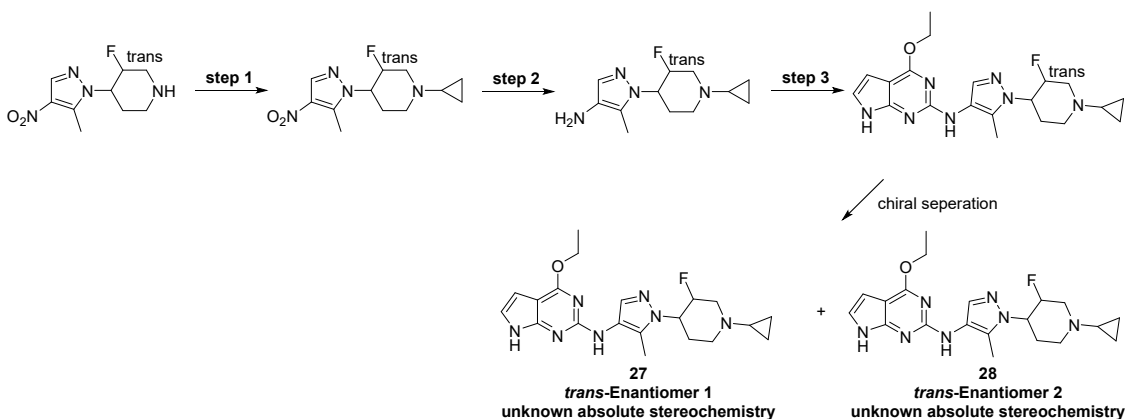

**Step 1:** *(±)-(trans)-1-cyclopropyl-3-fluoro-4-(5-methyl-4-nitro-1H-pyrazol-1-yl)piperidine*.

To a solution of *(±)-(trans)-3-fluoro-4-(5-methyl-4-nitro-1H-pyrazol-1-yl)piperidine* hydrochloride (230 mg, 0.903 mmol) and (1-ethoxycyclopropoxy)trimethylsilane (250 mg, 1.43 mmol) in MeOH (5 mL) and acetic acid (1 mL) was added NaBH<sub>3</sub>CN (90 mg, 1.43 mmol) slowly. The reaction was stirred at 65°C overnight. MeOH was removed and the residue was portioned between sat. NaHCO<sub>3</sub> solution (10mL) and EtOAc (10 mL). The NaHCO<sub>3</sub> solution was extracted with EtOAc (10 mL×2). The combined EtOAc layers were dried over Na<sub>2</sub>SO<sub>4</sub> and concentrated. The residue was purified by Prep-TLC (PE/EtOAc = 3: 1) to give the title product (130 mg, yield 57%) as a colorless oil. <sup>1</sup>H NMR (300 MHz, CDCl<sub>3</sub>): δ 8.11 (s, 1 H), 4.95~4.70 (m, 1 H), 4.15~4.03 (m, 1 H), 3.51~3.44 (m, 1 H), 3.13~3.09 (m, 1 H), 2.66 (s, 3 H), 2.44~2.31 (m, 3 H), 1.94~1.87 (m, 1H), 1.81-1.74 (m, 2 H), 0.53~0.039 (m, 4 H).

**Step 2:** *(±)-(trans)-1-(1-cyclopropyl-3-fluoropiperidin-4-yl)-5-methyl-1H-pyrazol-4-amine*.

To a solution of *(±)-(trans)-1-cyclopropyl-3-fluoro-4-(5-methyl-4-nitro-1H-pyrazol-1-yl)piperidine* (120 mg, 0.447 mmol) in MeOH (10 mL) was added Pd/C (30 mg, 10%) at room temperature. The reaction was stirred at room temperature under H<sub>2</sub> atmosphere for 3 hours. The Pd/C was filtered and washed with MeOH (5 mL). The filtrate was concentrated to give the title product (80 mg, yield 75%) as yellow oil. <sup>1</sup>H NMR (300 MHz, CDCl<sub>3</sub>): δ (s, 1 H), 4.94~4.69 (m, 1 H), 3.99~3.86 (m, 1 H), 3.43~3.40 (m, 1 H), 3.07~3.04 (m, 1 H), 2.66 (br s, 2H), 2.40~2.23 (m, 3 H), 2.15 (s, 3 H), 1.87~1.71 (m, 2 H), 0.49~0.37 (m, 4 H).

**Step 3:** *(trans)-N-(1-(1-cyclopropyl-3-fluoropiperidin-4-yl)-5-methyl-1H-pyrazol-4-yl)-4-ethoxy-7H-pyrrolo[2,3-d]pyrimidin-2-amine*. To a solution of *((±)-(trans)-1-(1-cyclopropyl-3-fluoropiperidin-4-yl)-5-methyl-1H-pyrazol-4-amine* (80 mg, 0.33 mmol) in dioxane (15 mL) was added 2-chloro-4-ethoxy-7H-pyrrolo[2,3-d]pyrimidine (132 mg, 0.672 mmol), Pd<sub>2</sub>(dba)<sub>3</sub> (30 mg, 0.033 mmol), Xphos (32 mg, 0.067 mmol), and K<sub>2</sub>CO<sub>3</sub> (138 mg, 1.00 mmol) at room temperature under N<sub>2</sub> atmosphere. The mixture was stirred at 100 °C overnight. The mixture was filtered and the filtrate was concentrated. The residue was purified by column (PE/EtOAc = 1/1~1/2) to give racemate as a white solid (70 mg, yield 52%), which was separated by SFC (Chiral condition: chiralpak IE, 60-40-CO<sub>2</sub>-MeOH, Flow: 1.799, T = 43 °C) to give **27** (11.1 mg, Rt = 4.4 min, 100% ee) and **28** (13.0 mg, Rt = 5.6 min, 98.12% ee). LC-MS: Rt= 4.24 min; 400 [M+H]<sup>+</sup>.

**27:** <sup>1</sup>H NMR (400 MHz, DMSO-*d*<sub>6</sub>): δ 11.22 (br. s., 1H), 8.03 (br. s., 1H), 7.65 (s, 1H), 6.86 (br. s., 1H), 6.21 (br. s., 1H), 4.61-4.96 (m, 1H), 4.44 (q, *J* = 6.8 Hz, 2H), 4.13-4.32 (m, 1H), 2.97 (d, *J* = 10.0 Hz, 1H), 2.33-2.47 (m, 2H), 2.19 (s, 3H), 1.94-2.10 (m, 1H), 1.73-1.92 (m, 2H), 1.35 (t, *J* = 6.8 Hz, 3H), 0.18-0.58 (m, 4H). <sup>13</sup>C NMR (101 MHz, DMSO-*d*<sub>6</sub>): δ 162.8, 157.8, 155.2, 135.2, 120.4, 120.2, 98.5, 98.0, 91.1, 89.4, 61.4, 59.5, 59.3, 56.6, 56.3, 51.7, 38.0, 30.2, 15.1, 9.1, 6.9, 6.6. <sup>19</sup>F NMR (376MHz, CD<sub>3</sub>OD): -189.5. HRMS (ESI): *m/z* calcd for C<sub>20</sub>H<sub>26</sub>FN<sub>7</sub>O [M+H]<sup>+</sup> 400.2261, found [M+H]<sup>+</sup> 400.2446.

**28:** <sup>1</sup>H NMR (400 MHz, DMSO-*d*<sub>6</sub>): δ 10.95-11.42 (m, 1H), 8.03 (br., 1H), 7.65 (s, 1H), 6.86 (br., 1H), 6.21 (br., 1H), 4.63-4.96 (m, 1H), 4.44 (q, *J* = 6.8 Hz, 2H), 4.25 (d, *J* = 5.6 Hz, 1H), 2.97 (d, *J* = 10.4 Hz, 1H), 2.31-2.45 (m, 2H), 2.19 (s, 3H), 1.93-2.11 (m, 1H), 1.73-1.90 (m, 2H), 1.35 (t, *J* = 6.8 Hz, 3H), 0.16-0.60 (m, 4H). <sup>13</sup>C NMR (101 MHz, DMSO-*d*<sub>6</sub>): δ 162.8, 157.8, 155.2, 135.2, 131.4, 120.4, 120.2, 98.5, 98.0, 91.1, 89.4, 61.4, 59.5, 56.5, 51.7, 38.0,

29.9, 15.1, 9.1, 6.9, 6.6. HRMS (ESI):  $m/z$  calcd for  $C_{20}H_{26}FN_7O$   $[M+H]^+$  400.2261, found  $[M+H]^+$  400.2458.

**Synthesis of 4-ethoxy-*N*-(1-((3*S*,4*S*)-3-fluoro-1-(oxetan-3-yl)piperidin-4-yl)-5-methyl-1*H*-pyrazol-4-yl)-7*H*-pyrrolo[2,3-*d*]pyrimidin-2-amine (29 and 30)**

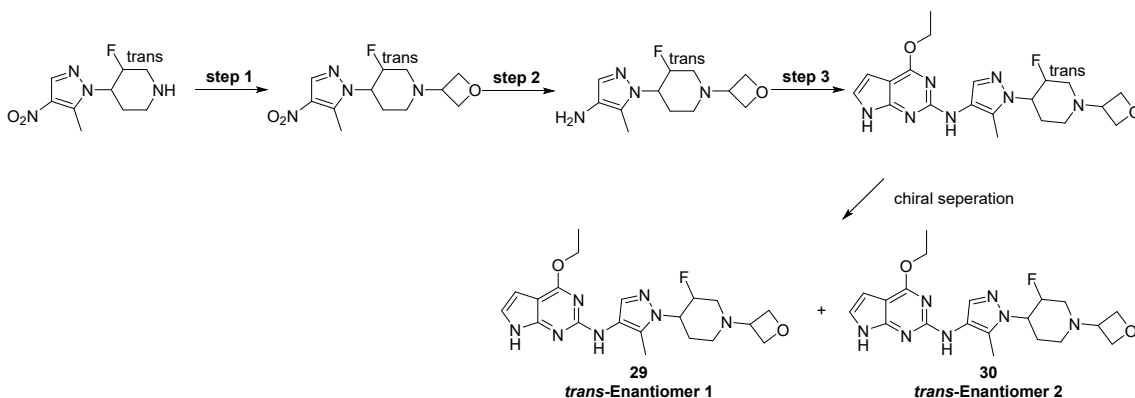

**Step 1:** ( $\pm$ )-(*trans*)-3-fluoro-4-(5-methyl-4-nitro-1*H*-pyrazol-1-yl)-1-(oxetan-3-yl)piperidine. To a solution of *tert*-butyl 3-fluoro-4-(5-methyl-4-nitro-1*H*-pyrazol-1-yl)piperidine-1-carboxylate (1.00 g, 4.38 mmol), oxetan-3-one (785 mg, 10.9 mmol) in DCE (40 mL) was added portions  $NaBH(OAc)_3$  (2.78 g, 13.1 mmol) at room temperature. The reaction was stirred overnight at room temperature. Aq.  $Na_2CO_3$  solution (30 mL) was added and the mixture was then extracted with DCM (50 mL\*2). The combined organic layers were dried and concentrated. The crude was purified by column chromatography on silica gel (PE: EA=1:1) to give the title compound (1.00 g, 80% yield) as a yellow solid. LCMS: 285  $[M+H]^+$ .  $^1H$  NMR (300 MHz,  $CDCl_3$ ):  $\delta$  8.14 (s, 1H), 5.07-4.83 (m, 1H), 4.71-4.58 (m, 4H), 4.17-4.04 (m, 1H), 3.70-3.61 (m, 1H), 3.26-3.18 (m, 1H), 2.90-2.84 (m, 1H), 2.67 (s, 3H), 2.52-2.44 (m, 1H), 2.14-1.93 (m, 3H).

**Step 2:** ( $\pm$ )-(*trans*)-1-(3-fluoro-1-(oxetan-3-yl)piperidin-4-yl)-5-methyl-1*H*-pyrazol-4-amine. A solution of ( $\pm$ )-(*trans*)-3-fluoro-4-(5-methyl-4-nitro-1*H*-pyrazol-1-yl)-1-(oxetan-3-yl)piperidine (500 mg, 1.76 mmol) and Pd/C (160 mg, 10%) in MeOH (20 mL) was stirred at 30 °C under  $H_2$  for 2 hrs. The mixture was filtered and the filtrate was concentrated. The crude was purified by column (DCM: MeOH=15: 1) to give the title compound (420 mg, 94 % yield) as a white solid. LCMS: 255  $[M+H]^+$ .  $^1H$  NMR (300 MHz,  $CDCl_3$ ):  $\delta$  7.23 (s, 1H), 5.07-4.83 (m, 1H), 4.69-4.61 (m, 4H), 4.01-3.89 (m, 1H), 3.67-3.60 (m, 1H), 3.49 (s, 1H), 3.21-3.13 (m, 1H), 2.85-2.79 (m, 1H), 2.48-2.34 (m, 1H), 2.18 (s, 3H), 2.07-1.90 (m, 3H).

**Step 3:** 4-ethoxy-*N*-(1-((3*S*,4*S*)-3-fluoro-1-(oxetan-3-yl)piperidin-4-yl)-5-methyl-1*H*-pyrazol-4-yl)-7*H*-pyrrolo[2,3-*d*]pyrimidin-2-amine. A solution of 2-chloro-4-ethoxy-7*H*-pyrrolo[2,3-*d*]pyrimidine (390 mg, 1.98 mmol), ( $\pm$ )-(*trans*)-1-(3-fluoro-1-(oxetan-3-yl)piperidin-4-yl)-5-methyl-1*H*-pyrazol-4-amine (420 mg, 1.65 mmol), X-phos (157 mg, 0.33 mmol),  $Pd_2(dba)_3$  (144 mg, 0.16 mmol) and  $K_2CO_3$  (683 mg, 4.95 mmol) in dioxane (20 mL) was stirred overnight at 100 °C under  $N_2$ . The mixture was filtered and the filtrate

was concentrated. The crude was purified by column chromatography on silica gel (DCM: MeOH= 40:1) to give the racemate (320 mg, 49 % yield) as a light yellow solid, which was further separated by chiral-HPLC and purified by prep-HPLC [Waters xbridge™ C18, 5  $\mu$ m, 19\*150 mm;Flowing phase: H<sub>2</sub>O (0.1%NH<sub>4</sub>HCO<sub>3</sub>)/MeCN: MeCN from 10% to 95%, 15 ml/min,T= 6 min] to give the title compounds **29** and **30**.

**29**: LCMS: 416 [M+H]<sup>+</sup>.  $t_R$  =3.50 mins. (LCMS condition 3)

Chiral HPLC:  $t_R$  =6.688 mins. (Chiralpak OD-H 5 $\mu$ m 4.6\*250mm, Hex:EtOH:DEA = 70:30:0.2, Flow: 1.0ml/min, 230 nm, T = 30°C )

<sup>1</sup>H NMR (300 MHz, DMSO-*d*<sub>6</sub>):  $\delta$  11.20 (s, 1H), 8.03 (s, 1H), 7.67 (s, 1H), 6.85 (s, 1H), 6.20 (s, 1H), 5.03-4.77 (m, 1H), 4.58-4.55 (m, 2H), 4.50-4.40 (m, 4H), 4.30-4.24 (m, 1H), 3.59-3.55 (m, 1H), 3.20-3.15 (m, 1H), 2.78-2.75 (m, 1H), 2.18 (s, 3H), 2.12-2.04 (m, 3H), 1.96-1.87 (m, 1H), 1.35 (t, *J* = 6.6 Hz, 3H). <sup>13</sup>C NMR (101 MHz, DMSO-*d*<sub>6</sub>):  $\delta$  162.7, 157.6, 155.1, 120.5, 120.2, 98.5, 98.0, 91.1, 89.4, 74.9, 61.4, 59.2, 58.4, 48.1, 29.9, 15.1, 9.1. <sup>19</sup>F NMR (376 MHz, DMSO-*d*<sub>6</sub>):  $\delta$  -186.1. HRMS (ESI): *m/z* calcd for C<sub>20</sub>H<sub>26</sub>FN<sub>7</sub>O<sub>2</sub> [M+H]<sup>+</sup> 416.2210, found [M+H]<sup>+</sup> 416.2217.

**30**: LCMS: 416 [M+H]<sup>+</sup>.  $t_R$  =2.98 mins. (LCMS condition 3)

Chiral HPLC:  $t_R$  =5.96 mins. (Chiralpak OD-H 5 $\mu$ m 4.6\*250mm, Hex:EtOH:DEA = 70:30:0.2, Flow: 1.0ml/min, 230 nm, T = 30 °C )

<sup>1</sup>H NMR (300 MHz, DMSO-*d*<sub>6</sub>):  $\delta$  11.20 (s, 1H), 8.03 (s, 1H), 7.67 (s, 1H), 6.85 (s, 1H), 6.20 (s, 1H), 5.03-4.77 (m, 1H), 4.58-4.55 (m, 2H), 4.50-4.40 (m, 4H), 4.30-4.24 (m, 1H), 3.59-3.55 (m, 1H), 3.20-3.15 (m, 1H), 2.78-2.75 (m, 1H), 2.18 (s, 3H), 2.12-2.04 (m, 3H), 1.96-1.87 (m, 1H), 1.35 (t, *J* = 6.6 Hz, 3H). <sup>13</sup>C NMR (101 MHz, DMSO-*d*<sub>6</sub>):  $\delta$  162.8, 157.8, 155.2, 135.2, 132.0, 120.5, 120.2, 98.5, 98.0, 91.1, 89.4, 75.0, 74.9, 61.4, 59.2, 58.4, 52.7, 48.1, 30.0, 15.1, 9.1. <sup>19</sup>F NMR (376 MHz, DMSO-*d*<sub>6</sub>):  $\delta$  -186.1. HRMS (ESI): *m/z* calcd for C<sub>20</sub>H<sub>26</sub>FN<sub>7</sub>O<sub>2</sub> [M+H]<sup>+</sup> 416.2210, found [M+H]<sup>+</sup> 416.2213.

**Synthesis of *cis*-4-ethoxy-*N*-(1-(3-fluoro-1-(oxetan-3-yl)piperidin-4-yl)-5-methyl-1*H*-pyrazol-4-yl)-7*H*-pyrrolo[2,3-*d*]pyrimidin-2-amine (enantiomers 31 and 32)**



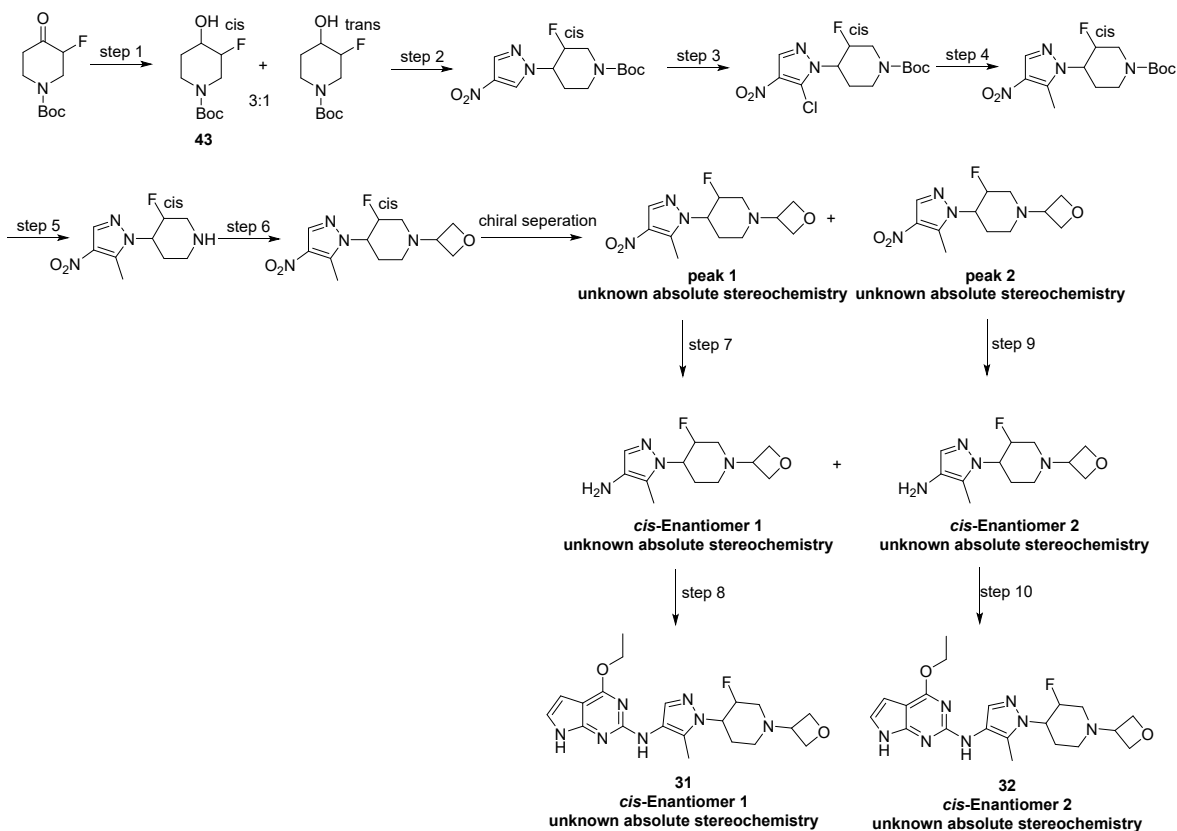

**Step 1:** (*±*)-*trans*-*tert*-butyl 3-fluoro-4-hydroxypiperidine-1-carboxylate. To a solution of *tert*-butyl 3-fluoro-4-oxopiperidine-1-carboxylate (10 g, 23 mmol) in MeOH (100 mL) was added NaBH<sub>4</sub> (2.27 g, 60.0 mmol) under ice cooling. The reaction mixture was stirred at this temperature for 2 hours. Aq. NH<sub>4</sub>Cl (100 mL) was added and the solution was extracted with EtOAc (80 mL×3). The organic layer was dried and concentrated. The crude was purified by flash chromatography on C18 to give the title compound (2 g, 20 % yield) as a white solid. LCMS: 220[M+H]<sup>+</sup>. <sup>1</sup>H NMR (300 MHz, CDCl<sub>3</sub>): 4.16 - 4.39 (m, 2H), 3.74 - 3.90 (m, 2H), 2.89 - 2.98 (m, 2H), 1.93 - 2.01 (m, 1H), 1.45 - 1.54 (m, 1H), 1.45 (s, 9H).

The major *cis*-product **43** was also isolated as a white solid (6g, 60% yield). <sup>1</sup>H NMR (300 MHz, CDCl<sub>3</sub>): δ 4.50-4.68 (m, 1H), 3.89-3.93 (m, 2H), 3.65-3.71 (m, 1H), 3.35-3.44 (m, 1H), 3.17-3.21 (m, 1H), 2.07-2.09 (m, 1H), 1.76-1.86 (m, 2H), 1.45 (s, 9H). LCMS: 220 [M+H]<sup>+</sup>.

**Step 2:** (*±*)-*cis*-*tert*-butyl 3-fluoro-4-(4-nitro-1H-pyrazol-1-yl)piperidine-1-carboxylate. To a solution (*±*)-*trans*-*tert*-butyl 3-fluoro-4-hydroxypiperidine-1-carboxylate. (2.0 g, 9.1 mmol), 4-nitro-1H-pyrazole (1.03 g, 9.11 mmol), PPh<sub>3</sub> (3.57 g, 13.6 mmol) in THF (50 mL) was added slowly DIAD (2.75 g, 13.6 mmol) at 0 °C. The mixture was stirred overnight at room temperature. Solvent was evaporated and the residue was dissolved in DCM (30 mL) and *n*-hexane (60 mL) was added. The suspension was stirred vigorously for 1 hour and then filtered. The filtrate was concentrated and the crude was purified by column chromatography on C18 (CH<sub>3</sub>CN: H<sub>2</sub>O=4:1~1:1) to give the title compound as yellow oil (2.4 g, 86 % yield). LCMS: 314 [M+H]<sup>+</sup>. <sup>1</sup>H NMR (300 MHz, CDCl<sub>3</sub>): δ 8.25 (s, 1H), 8.10 (s,

1H), 4.86 - 5.03 (m, 1H), 4.39 - 4.55 (m, 3H), 2.85 - 3.13 (m, 2H), 2.24 - 2.38 (m, 1H), 2.00 - 2.08 (m, 1H), 1.48 (s, 9H).

**Step 3:** (*±*)-*cis*-*tert*-butyl 4-(5-chloro-4-nitro-1H-pyrazol-1-yl)-3-fluoropiperidine-1-carboxylate. To a solution of DIPEA (0.98 g, 9.7 mmol) in THF (15 mL) was added *n*-BuLi (3.9 mL, 9.7 mmol) at -78 °C under N<sub>2</sub> atmosphere. The reaction mixture was stirred at this temperature for 30 min and then at 0 °C for 30 min. To a solution of (*±*)-*cis*-*tert*-butyl 3-fluoro-4-(4-nitro-1H-pyrazol-1-yl)piperidine-1-carboxylate (1.7 g, 5.40 mmol) in THF (20 mL) was added above LDA solution at -78 °C. The reaction mixture was stirred at this temperature for 1.5 h and perchloroethane (2.30 g, 9.72 mmol) was added. The reaction mixture was stirred at -78 °C for 30 min and then allowed to warm to room temperature for 1 hour. NH<sub>4</sub>Cl aq. (40 mL) was added and the solution was extracted with EtOAc (50 mL×2). The organic layer was dried and concentrated. The crude was purified by chromatography on silica gel (PE: EA = 8:1) to give the title compound (640 mg, 36 % yield) as a white solid. <sup>1</sup>H NMR (300 MHz, CDCl<sub>3</sub>): δ 8.22 (s, 1H), 4.94-4.74 (m, 1H), 4.68-4.33 (m, 3H), 3.26-2.97 (m, 2H), 2.84-2.71 (m, 1H), 1.96-1.88 (m, 1H), 1.48 (s, 9H).

**Step 4:** (*±*)-*cis*-*tert*-butyl 3-fluoro-4-(5-methyl-4-nitro-1H-pyrazol-1-yl)piperidine-1-carboxylate. A solution of (*±*)-*cis*-*tert*-butyl 4-(5-chloro-4-nitro-1H-pyrazol-1-yl)-3-fluoropiperidine-1-carboxylate (640 mg, 1.86 mmol), 2,4,6-trimethyl-cyclotriboroxane (224 mg, 1.77 mmol), Pd(dppf)Cl<sub>2</sub> (310 mg, 0.37 mmol), Na<sub>2</sub>CO<sub>3</sub> (297 mg, 2.80 mmol) and KOAc (224 mg, 2.80 mmol) in H<sub>2</sub>O (2.8 mL) and acetonitrile (15 mL) was irradiated under microwave at 130 °C for 1.5 hours. The mixture was cooled to room temperature and filtered through a celite pad. The solution was concentrated and the crude was purified by column chromatography on silica gel (PE: EA = 5:1) to give the title compound (710 mg, 60% yield) as a yellow solid. LCMS: 229 [M+H-100]<sup>+</sup>. <sup>1</sup>H NMR (300 MHz, CDCl<sub>3</sub>): δ 8.11 (s, 1H), 4.84-4.69 (m, 1H), 4.52-4.26 (m, 3H), 3.33-3.10 (m, 2H), 2.77-2.64 (m, 1H), 2.71 (s, 3H), 1.99-1.92 (m, 1H), 1.47 (s, 9H).

**Step 5:** (*±*)-*cis*-3-fluoro-4-(5-methyl-4-nitro-1H-pyrazol-1-yl)piperidine. To a solution of (*±*)-*cis*-*tert*-butyl 3-fluoro-4-(5-methyl-4-nitro-1H-pyrazol-1-yl)piperidine-1-carboxylate (710 mg, 2.16 mmol) in MeOH (7 mL) was added HCl/dioxane (5.7 M, 10 mL). The reaction was stirred at room temperature for 2 hrs. Solvent was removed, and the residue was dissolved in Na<sub>2</sub>CO<sub>3</sub> aqueous solution (20 mL) and extracted with DCM/MeOH (10:1, 20 mL×5). The combined organic layers were dried and concentrated to give the title compound (500 mg, 100% yield) as a yellow solid. LCMS: 229 [M+H]<sup>+</sup>. <sup>1</sup>H NMR (300 MHz, CDCl<sub>3</sub>): δ 8.12 (s, 1H), 4.78-4.61 (m, 1H), 4.44-4.32 (m, 1H), 3.47-3.35 (m, 3H), 2.87-2.63 (m, 2H), 2.71 (s, 3H), 1.91-1.85 (m, 1H), 1.64-1.57 (m, 1H).

**Step 6:** *cis*-3-fluoro-4-(5-methyl-4-nitro-1H-pyrazol-1-yl)-1-(oxetan-3-yl)piperidine. To a solution of (*±*)-*cis*-3-fluoro-4-(5-methyl-4-nitro-1H-pyrazol-1-yl)piperidine (500 mg, 2.20 mmol), oxetan-3-one (395 mg, 5.48 mmol) in DCE (20 mL) was added portions NaBH(OAc)<sub>3</sub> (1.4 g, 6.6 mmol) at room temperature. The reaction mixture was stirred overnight at room temperature. Na<sub>2</sub>CO<sub>3</sub> aqueous solution (30 mL) was added and extracted with DCM (530 mL×5). The combined organic layer was dried and concentrated. The crude was purified by column chromatography on C18 (25-60% ACN in water) to afford desired product (470 mg, 75% yield) as a white solid, which was separated by chiral HPLC (chiralpak IA 5 μm 4.6×250 mm, Hex/EtOH: 50/50, 1.0 mL/min) to give the title

compounds **peak 1** (200 mg,  $t_R$ =7.939 min) and **peak 2** (180 mg,  $t_R$ =10.224 min) was prepared as white solids. LCMS: 285 [M+H]<sup>+</sup>. <sup>1</sup>H NMR (300 MHz, CDCl<sub>3</sub>):  $\delta$  8.09 (s, 1H), 4.93-4.76 (m, 1H), 4.70-4.60 (m, 4H), 4.50-4.37 (m, 1H), 3.74-3.68 (m, 1H), 3.09-2.96 (m, 2H), 2.77-2.75 (m, 1H), 2.70 (s, 3H), 2.50-2.27 (m, 2H), 2.09-2.00 (m, 1H).

**Step 7:** *cis-1-(3-fluoro-1-(oxetan-3-yl)piperidin-4-yl)-5-methyl-1H-pyrazol-4-amine (enantiomer 1)*. A solution of *cis-3-fluoro-4-(5-methyl-4-nitro-1H-pyrazol-1-yl)-1-(oxetan-3-yl)piperidine* (**peak 1**, 200 mg, 0.70 mmol) and Pd/C (60 mg, 10%) in MeOH (8 mL) was stirred at 30 °C under hydrogen for 1 hour. The mixture was filtered and the filtrate was concentrated to give the title compound (150 mg, 85 % yield) as a white solid. LCMS: 255 [M+H]<sup>+</sup>. <sup>1</sup>H NMR (300 MHz, CDCl<sub>3</sub>):  $\delta$  7.18 (s, 1H), 4.89-4.61 (m, 5H), 4.32-4.18 (m, 1H), 3.73-3.64 (m, 1H), 3.10-3.02 (m, 2H), 2.78-2.74 (m, 1H), 2.66-2.61 (br. s., 2H), 2.40-2.17 (m, 2H), 2.21 (s, 3H), 2.01-1.93 (m, 1H).

**Step 8:** *cis-4-ethoxy-N-(1-(3-fluoro-1-(oxetan-3-yl)piperidin-4-yl)-5-methyl-1H-pyrazol-4-yl)-7H-pyrrolo[2,3-d]pyrimidin-2-amine Enantiomer 1 (31)*. A solution of 2-chloro-4-ethoxy-7H-pyrrolo[2,3-d]pyrimidine (128 mg, 0.648 mmol), *cis-1-(3-fluoro-1-(oxetan-3-yl)piperidin-4-yl)-5-methyl-1H-pyrazol-4-amine (enantiomer 1)* (150 mg, 0.590 mmol), X-phos (60 mg, 0.11 mmol), Pd<sub>2</sub>(dba)<sub>3</sub> (53 mg, 0.058 mmol), K<sub>2</sub>CO<sub>3</sub> (244 mg, 1.77 mmol) in dioxane (10 mL) was stirred at 110 °C under N<sub>2</sub> for 8 hrs. The mixture was filtered and the filtrate was concentrated. The crude was purified by column chromatography on C18 (20-50% ACN in water) and further purified by prep-HPLC (Instrument: Column: Boston C18, 5  $\mu$ m, 21\*150 mm; Mobile phase: H<sub>2</sub>O (0.1% NH<sub>4</sub>HCO<sub>3</sub>)/MeCN: MeCN from 20% to 70%, 20 ml/min, T = 15 min,  $t_R$  = 7.2 min) to give the title compound (30 mg, 100% ee) as a light yellow solid.

LCMS: 416 [M+H]<sup>+</sup>.  $t_R$  = 3.29 mins. (LCMS condition 3)

Chiral HPLC:  $t_R$  = 6.73 mins. (Chiral condition: OD-H; 5  $\mu$ m 4.6\*250mm, Hex:EtOH:DEA = 70:30:0.2, Flow: 1.0ml/min, 230 nm, T = 30°C.) unknown absolute stereochemistry

<sup>1</sup>H NMR (300 MHz, DMSO-*d*<sub>6</sub>):  $\delta$  11.20 (s, 1H), 8.03 (s, 1H), 7.59 (s, 1H), 6.85 (m, 1H), 6.20 (m, 1H), 4.89-4.77 (m, 1H), 4.57-4.36 (m, 7H), 3.57-3.52 (m, 1H), 2.99-2.89 (m, 2H), 2.67-2.58 (m, 1H), 2.21 (s, 3H), 2.35-2.07 (m, 2H), 1.82-1.78 (m, 1H), 1.35 (t,  $J$  = 6.6 Hz, 3H). <sup>13</sup>C NMR (101 MHz, DMSO-*d*<sub>6</sub>):  $\delta$  162.8, 157.7, 155.2, 134.3, 130.4, 124.8, 121.1, 120.2, 98.5, 98.0, 88.7, 86.9, 74.9, 61.4, 58.5, 57.0, 52.0, 48.1, 25.1, 15.1, 9.3. <sup>19</sup>F NMR (376 MHz, DMSO-*d*<sub>6</sub>):  $\delta$  -198.1. HRMS (ESI):  $m/z$  calcd for C<sub>20</sub>H<sub>26</sub>FN<sub>7</sub>O<sub>2</sub> [M+H]<sup>+</sup> 416.2210, found [M+H]<sup>+</sup> 416.2213.

**Step 9:** *cis-1-(3-fluoro-1-(oxetan-3-yl)piperidin-4-yl)-5-methyl-1H-pyrazol-4-amine (enantiomer 2)*. A solution of *cis-3-fluoro-4-(5-methyl-4-nitro-1H-pyrazol-1-yl)-1-(oxetan-3-yl)piperidine* (**peak 2**, 180 mg, 0.63 mmol) and Pd/C (30 mg, 10%) in MeOH (8 mL) was stirred at 30 °C under H<sub>2</sub> balloon for 1 hour. The mixture was filtered and the filtrate was concentrated to give the title compound (140 mg, 87 % yield) as a white solid. LCMS: 255 [M+H]<sup>+</sup>. <sup>1</sup>H NMR (300 MHz, CDCl<sub>3</sub>):  $\delta$  7.18 (s, 1H), 4.89-4.61 (m, 5H), 4.32-4.18 (m, 1H), 3.73-3.64 (m, 1H), 3.10-3.02 (m, 2H), 2.78-2.74 (m, 1H), 2.66-2.61 (br. s., 2H), 2.40-2.17 (m, 2H), 2.21 (s, 3H), 2.01-1.93 (m, 1H).

**Step 10:** *cis-4-ethoxy-N-(1-(3-fluoro-1-(oxetan-3-yl)piperidin-4-yl)-5-methyl-1H-pyrazol-4-yl)-7H-pyrrolo[2,3-d]pyrimidin-2-amine Enantiomer 2 (32)*. A solution of 2-chloro-4-ethoxy-7H-pyrrolo[2,3-d]pyrimidine (128 mg, 0.648 mmol), *cis-1-(3-fluoro-1-(oxetan-3-*

yl)piperidin-4-yl)-5-methyl-1H-pyrazol-4-amine (enantiomer 2) (150 mg, 0.590 mmol), X-phos (60 mg, 0.11 mmol), Pd<sub>2</sub>(dba)<sub>3</sub> (53 mg, 0.058 mmol), K<sub>2</sub>CO<sub>3</sub> (244 mg, 1.77 mmol) in dioxane (10 mL) was stirred at 110 °C under N<sub>2</sub> for 8 hrs. The mixture was filtered and the filtrate was concentrated. The crude was purified by column chromatography on C18 (20-50% ACN in water) and further purified by prep-HPLC (Instrument: Column: Boston C18, 5 µm, 21\*150 mm; Mobile phase: H<sub>2</sub>O (0.1% NH<sub>4</sub>HCO<sub>3</sub>)/MeCN: MeCN from 20% to 70%, 20 ml/min, T = 15 min, rt= 7.2 min) to give the title compound (30 mg, 100% ee) as a light yellow solid.

LCMS: 416 [M+H]<sup>+</sup>. t<sub>R</sub> = 3.29 mins. (LCMS condition 3)

Chiral HPLC: t<sub>R</sub> = 6.73 mins. (Chiral condition: OD-H; 5µm 4.6\*250mm, Hex:EtOH:DEA = 70:30:0.2, Flow: 1.0ml/min, 230 nm, T = 30°C.) unknown absolute stereochemistry

<sup>1</sup>H NMR (300 MHz, DMSO-*d*<sub>6</sub>): δ 11.20 (s, 1H), 8.03 (s, 1H), 7.59 (s, 1H), 6.85 (m, 1H), 6.20 (m, 1H), 4.89-4.77 (m, 1H), 4.57-4.36 (m, 7H), 3.57-3.52 (m, 1H), 2.99-2.89 (m, 2H), 2.67-2.58 (m, 1H), 2.21 (s, 3H), 2.35-2.07 (m, 2H), 1.82-1.78 (m, 1H), 1.35 (t, *J* = 6.6 Hz, 3H). <sup>19</sup>F NMR (376 MHz, DMSO-*d*<sub>6</sub>): δ -198.1.

### Synthesis of (trans)-4-ethoxy-N-(5-ethyl-1-(3-fluoro-1-(oxetan-3-yl)piperidin-4-yl)-1H-pyrazol-4-yl)-7H-pyrrolo[2,3-*d*]pyrimidin-2-amine (33 and 34)

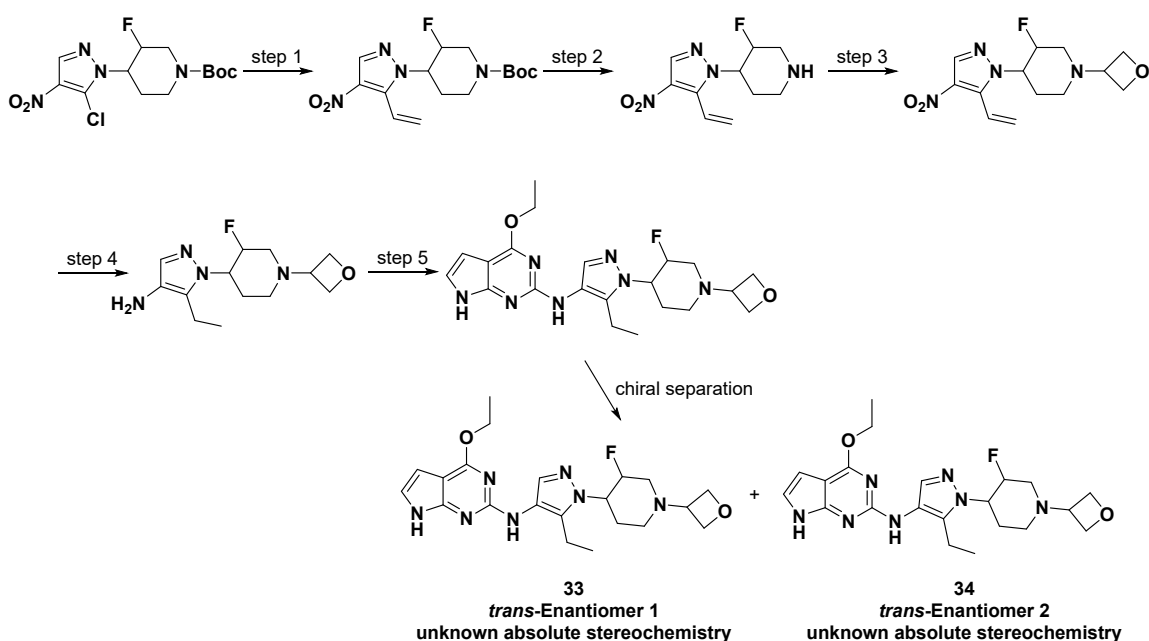

**Step 1:** (±)-(trans)-tert-butyl 3-fluoro-4-(4-nitro-5-vinyl-1H-pyrazol-1-yl)piperidine-1-carboxylate. A solution of (±)-(trans)-tert-butyl 4-(5-chloro-4-nitro-1H-pyrazol-1-yl)-3-fluoropiperidine-1-carboxylate (700 mg, 2.01 mmol), 4,4,5,5-tetramethyl-2-vinyl-1,3,2-dioxaborolane (775 mg, 5.03 mmol), Na<sub>2</sub>CO<sub>3</sub> (640 mg, 6.03 mmol) and PdCl<sub>2</sub>(dppf) (180 mg, 0.22 mmol) in dioxane (10 mL) and water (2 mL) was stirred at 120 °C under nitrogen for 2 days. The mixture was cooled to room temperature and filtered. The filtrate was concentrated. The residue was poured into water (50 mL) and extracted with EtOAc (50 mL×3). The extracts were dried over Na<sub>2</sub>SO<sub>4</sub> and concentrated. The crude was purified by

column chromatography on silica gel (PE: EA = 5:1) to give the title compound (400 mg, 58%) as red oil. LCMS: 241 [M+H-100]<sup>+</sup>. <sup>1</sup>H NMR (300 MHz, CDCl<sub>3</sub>): δ 8.16 (s, 1H), 6.85 - 6.95 (m, 1H), 5.80 - 5.97 (m, 2H), 4.82 - 5.06 (m, 1H), 4.42 - 4.65 (m, 2H), 4.19 - 4.26 (m, 1H), 2.72 - 2.93 (m, 2H), 2.23 - 2.37 (m, 1H), 1.90 - 1.95 (m, 1H), 1.48 (s, 9H).

**Step 2:** *(±)-(trans)-3-fluoro-4-(4-nitro-5-vinyl-1H-pyrazol-1-yl)piperidine*. To a solution of *(±)-(trans)-tert-butyl 3-fluoro-4-(4-nitro-5-vinyl-1H-pyrazol-1-yl)piperidine-1-carboxylate* (400 mg, 1.18 mmol) in MeOH (5 mL) added HCl/dioxane (4 M, 5mL). The reaction was stirred overnight at room temperature. The mixture was concentrated and the residue was poured into water (40 mL) and extracted with EtOAc (40 mL×2). The aqueous layer was basified with NaOH (aq., 2N, 10 mL) to pH=9 and extracted with EtOAc (40 mL×3). The extracts were dried over Na<sub>2</sub>SO<sub>4</sub> and concentrated to give the title compound (200 mg, yield 70%) as brown oil. LCMS: 241 [M+H]<sup>+</sup>. <sup>1</sup>H NMR (300 MHz, CDCl<sub>3</sub>): δ 8.17 (s, 1H), 6.85 - 6.95 (m, 1H), 5.81 - 5.96 (m, 2H), 4.81 - 5.07 (m, 1H), 4.38 - 4.52 (m, 1H), 3.51 - 3.56 (m, 1H), 3.15 - 3.19 (m, 1H), 2.62 - 2.76 (m, 2H), 2.04 - 2.30 (m, 1H), 1.93 - 1.98 (m, 1H).

**Step 3:** *(±)-(trans)-3-fluoro-4-(4-nitro-5-vinyl-1H-pyrazol-1-yl)-1-(oxetan-3-yl)piperidine*. To a solution of *(±)-(trans)-3-fluoro-4-(4-nitro-5-vinyl-1H-pyrazol-1-yl)piperidine* (200 mg, 0.83 mmol) and oxetan-3-one (150 mg, 2.08 mmol) in 1,2-dichloroethane (10 mL) was added NaBH(OAc)<sub>3</sub> at room temperature as portions. Then the reaction was stirred at room temperature for 2 hour. The mixture was poured into satur. Na<sub>2</sub>CO<sub>3</sub> aqueous solution (40 mL) and extracted with DCM (40 mL×3). The extracts were dried over Na<sub>2</sub>SO<sub>4</sub> and concentrated. The crude was purified by column C18 (30 ~ 60% CH<sub>3</sub>CN in water) to give the title compound (150 mg, 61% yield) as colorless oil. LCMS: 297 [M+H]<sup>+</sup>. <sup>1</sup>H NMR (300 MHz, CDCl<sub>3</sub>): δ 8.18 (s, 1H), 6.84 - 6.94 (m, 1H), 5.79 - 5.95 (m, 2H), 4.98 - 5.22 (m, 1H), 4.60 - 4.69 (m, 5H), 4.31 - 4.44 (m, 1H), 3.61 - 3.69 (m, 1H), 3.21 - 3.27 (m, 1H), 2.83 - 2.87 (m, 1H), 2.36 - 2.50 (m, 1H), 1.90 - 2.12 (m, 2H).

**Step 4:** *(±)-(trans)-5-ethyl-1-(3-fluoro-1-(oxetan-3-yl)piperidin-4-yl)-1H-pyrazol-4-amine*. A solution of *(±)-(trans)-3-fluoro-4-(4-nitro-5-vinyl-1H-pyrazol-1-yl)-1-(oxetan-3-yl)piperidine* (150 mg, 0.51 mmol) and Pd/C (10%, 50 mg) in MeOH (5 mL) was stirred under H<sub>2</sub> at room temperature for 2 hours. The reaction mixture was filtered and the filtrate was concentrated to give the title compound (125 mg, 91% yield) as colorless oil. LCMS: 269 [M+H]<sup>+</sup>. <sup>1</sup>H NMR (300 MHz, CDCl<sub>3</sub>): δ 7.23 (s, 1H), 4.88 - 5.13 (m, 1H), 4.61 - 4.67 (m, 4H), 3.88 - 3.98 (m, 1H), 3.60 - 3.69 (m, 1H), 3.15 - 3.21 (m, 1H), 2.79 - 2.84 (m, 1H), 2.61 - 2.64 (m, 2H), 2.32 - 2.46 (m, 1H), 1.98 - 2.11 (m, 2H), 1.89 - 1.95 (m, 1H), 1.16 (t, J = 7.6 Hz, 3H).

**Step 5:** *(trans)-4-ethoxy-N-(5-ethyl-1-(3-fluoro-1-(oxetan-3-yl)piperidin-4-yl)-1H-pyrazol-4-yl)-7H-pyrrolo[2,3-d]pyrimidin-2-amine*. To a solution of *(±)-(trans)-5-ethyl-1-(3-fluoro-1-(oxetan-3-yl)piperidin-4-yl)-1H-pyrazol-4-amine* (125 mg, 0.47 mmol), 2-chloro-4-ethoxy-7H-pyrrolo[2,3-d]pyrimidine (101 mg, 0.51 mmol), K<sub>2</sub>CO<sub>3</sub> (259 mg, 1.88 mmol) and X-phos (41 mg, 0.071 mmol) in dioxane (15 mL) was added Pd<sub>2</sub>(dba)<sub>3</sub> (42 mg, 0.047 mmol) at room temperature under N<sub>2</sub> atmosphere. The reaction was stirred at 120°C for 16 hours. The mixture was filtered and the filtrate was concentrated. The crude was purified by column chromatography on silica gel (DCM: MeOH= 50: 1) to afford the desired racemate (80 mg, 75%), which was separated by chiral HPLC (OJ-H 5μm 4.6\*250mm phase: Hex/EtOH = 70/30, F: 1ml/min w: 230nm T: 30) and column on C18 (35 ~ 55%

CH<sub>3</sub>CN in water) to give the title compounds **33** (14 mg,  $t_R$  = 8.735 min, 100% ee) and **34** (10 mg,  $t_R$  = 11.262 min, 97.5% ee) as white solids.

**33**: LCMS: 430 [M+H]<sup>+</sup>.  $t_R$  = 3.298 mins. (LCMS condition 3)

Chiral HPLC:  $t_R$  = 8.735 mins. (Chiralcel OJ-H 5  $\mu$ m 4.6  $\times$  250 mm, phase: Hex: EtOH = 70: 30, F: 1 mL/min, w: 230 nm T: 30 °C) unknown absolute stereochemistry

<sup>1</sup>H NMR (400 MHz, CD<sub>3</sub>OD):  $\delta$  7.74 (s, 1H), 6.80 (d,  $J$  = 3.6 Hz, 1H), 6.28 (d,  $J$  = 3.6 Hz, 1H), 4.09 - 5.09 (m, 1H), 4.71 (t,  $J$  = 6.4 Hz, 2H), 4.63 (q,  $J$  = 6.4 Hz, 2H), 4.47 (q,  $J$  = 7.2 Hz, 2H), 4.20 - 4.30 (m, 1H), 3.65 - 3.72 (m, 1H), 3.23 - 3.25 (m, 1H), 2.86 - 2.89 (m, 1H), 2.73 (q,  $J$  = 7.6 Hz, 2H), 2.28 - 2.38 (m, 1H), 2.10 - 2.18 (m, 2H), 1.97 - 2.03 (m, 1H), 1.40 (t,  $J$  = 7.2 Hz, 3H), 1.17 (t,  $J$  = 7.6 Hz, 3H). <sup>13</sup>C NMR (101 MHz, DMSO-*d*<sub>6</sub>):  $\delta$  162.8, 158.1, 155.2, 135.9, 120.1, 119.6, 98.5, 97.9, 90.9, 89.1, 75.0, 74.9, 61.4, 59.3, 59.1, 58.4, 52.8, 52.6, 48.1, 30.6, 16.2, 15.1, 14.2. <sup>19</sup>F NMR (CD<sub>3</sub>OD, 376 MHz):  $\delta$  -189.1.

**34**: LCMS: 430 [M+H]<sup>+</sup>.  $t_R$  = 3.298 mins. (LCMS condition 3)

Chiral HPLC:  $t_R$  = 11.262 mins. (Chiralcel OJ-H 5  $\mu$ m 4.6  $\times$  250 mm, phase: Hex: EtOH = 70: 30, F: 1 mL/min, w: 230 nm T: 30 °C) unknown absolute stereochemistry

<sup>1</sup>H NMR (400 MHz, CD<sub>3</sub>OD):  $\delta$  7.74 (s, 1H), 6.80 (d,  $J$  = 3.6 Hz, 1H), 6.28 (d,  $J$  = 3.6 Hz, 1H), 4.90 - 5.08 (m, 1H), 4.71 (t,  $J$  = 6.4 Hz, 2H), 4.63 (q,  $J$  = 6.4 Hz, 2H), 4.47 (q,  $J$  = 7.2 Hz, 2H), 4.20 - 4.30 (m, 1H), 3.65 - 3.72 (m, 1H), 3.23 - 3.25 (m, 1H), 2.86 - 2.89 (m, 1H), 2.73 (q,  $J$  = 7.6 Hz, 2H), 2.28 - 2.38 (m, 1H), 2.10 - 2.18 (m, 2H), 1.96 - 2.03 (m, 1H), 1.40 (t,  $J$  = 7.2 Hz, 3H), 1.17 (t,  $J$  = 7.6 Hz, 3H). <sup>19</sup>F NMR (CD<sub>3</sub>OD, 376 MHz):  $\delta$  -189.1.

**Synthesis of (*trans*)-N-(5-(difluoromethyl)-1-(3-fluoro-1-(oxetan-3-yl)piperidin-4-yl)-1H-pyrazol-4-yl)-4-ethoxy-7H-pyrrolo[2,3-*d*]pyrimidin-2-amine (35 and 36)**

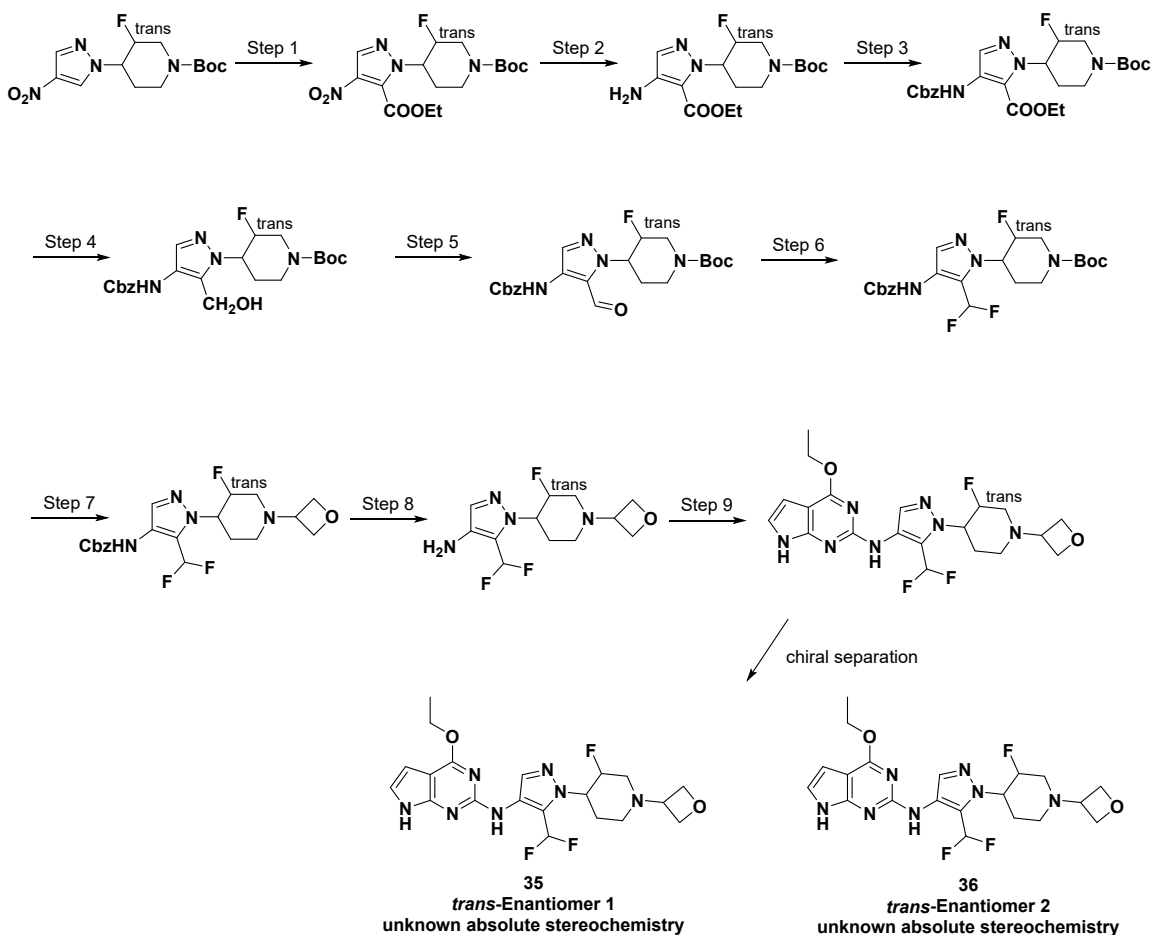

**Step 1:** *(±)*-(*trans*)-*tert*-butyl 4-(5-(ethoxycarbonyl)-4-nitro-1*H*-pyrazol-1-yl)-3-fluoro piperidine-1-carboxylate. To a solution of *(±)*-(*trans*)-*tert*-butyl 3-fluoro-4-(4-nitro-1*H*-pyrazol-1-yl)piperidine-1-carboxylate (2.34 g, 7.45 mmol) (according to the synthesis of **21** and **22**) in dry THF (50 mL) was added dropwise LiHMDS (14.9 mL, 1 M in THF) at -78 °C under N<sub>2</sub>. After stirred at -78 °C for 30 min, ethyl chloroformate (1.43 mL, 14.9 mmol) was added at -78 °C. The mixture was then warmed to room temperature and stirred for additional 2 hours. The mixture was quenched with satur. NH<sub>4</sub>Cl and then was extracted with EtOAc (20 mL×3). The combined organic layers were washed with brine and concentrated. The crude was purified by column chromatography on silica gel (PE: EA = 20:1) to give the title compound (2.20 g, 76%) as colorless oil. <sup>1</sup>H NMR (300 MHz, CDCl<sub>3</sub>): δ 8.09 (s, 1H), 4.62 - 4.91 (m, 2H), 4.44 - 4.54 (m, 2H), 4.23 (q, *J* = 7.2 Hz, 2H), 2.80 - 2.89 (m, 2H), 2.22 - 2.36 (m, 1H), 2.04 - 2.16 (m, 1H), 1.48 (s, 9H), 1.40 (t, *J* = 7.2 Hz, 3H).

**Step 2:** *(±)*-(*trans*)-*tert*-butyl 4-(4-amino-5-(ethoxycarbonyl)-1*H*-pyrazol-1-yl)-3-fluoropiperidine-1-carboxylate. A mixture of *(±)*-(*trans*)-*tert*-butyl 4-(5-(ethoxycarbonyl)-4-nitro-1*H*-pyrazol-1-yl)-3-fluoro piperidine-1-carboxylate (4.25 g, 11.0 mmol) and Pd/C (10%, 500 mg) in MeOH (40 mL) was stirred overnight at room temperature under H<sub>2</sub>. The suspension was filtrated and the filtrate was concentrated to give the title compound (3.74 g, 96%) as colorless oil. LC-MS: 301 [M+H-56]<sup>+</sup>. <sup>1</sup>H NMR (300 MHz, CDCl<sub>3</sub>): δ 7.19 (s, 1H), 5.28 - 5.39 (m, 1H), 4.80 - 5.07 (m, 1H), 4.44 - 4.56 (m, 1H), 4.38 (q, *J* = 7.2 Hz, 2H),

4.04 - 4.18 (m, 3H), 2.80 - 2.97 (m, 2H), 1.98 - 2.07 (m, 2H), 1.46 (s, 9H), 1.40 (t,  $J = 7.2$  Hz, 3H).

**Step 3:** *(±)-(trans)-tert-butyl 4-(4-(((benzyloxy)carbonyl)amino)-5-(ethoxycarbonyl)-1H-pyrazol-1-yl)-3-fluoro-piperidine-1-carboxylate*. To a solution of *(±)-(trans)-tert-butyl 4-(4-amino-5-(ethoxycarbonyl)-1H-pyrazol-1-yl)-3-fluoropiperidine-1-carboxylate* (3.74 g, 10.5 mmol) in THF (100 mL) was added aq.  $\text{Na}_2\text{CO}_3$  (3.34 g, 31.5 mmol, in 30 mL water). The mixture was cooled to 0 °C, CbzCl (2.69 g, 15.8 mmol) was added dropwise. After addition, the mixture was warmed to room temperature and stirred overnight. The mixture was quenched with Satur.  $\text{NH}_4\text{Cl}$  (20 mL) and water (20 mL), and then extracted with EtOAc (30 mL $\times$ 3). The combined organic layers were washed with brine, dried over  $\text{Na}_2\text{SO}_4$  and concentrated. The crude was purified by column chromatography on silica gel (PE: EA = 10:1) to give the title compound (4.62 g, 90% yield) as colorless oil. LC-MS: 435 [M+H-56]<sup>+</sup>.  $^1\text{H}$  NMR (300 MHz,  $\text{CDCl}_3$ ):  $\delta$  8.21 (s, 1H), 8.05 (s, 1H), 7.36 - 7.40 (m, 5H), 5.28 - 5.39 (m, 1H), 5.22 (s, 2H), 4.81 - 5.06 (m, 1H), 4.48 - 4.58 (m, 1H), 4.42 (q,  $J = 7.2$  Hz, 2H), 4.10 - 4.28 (m, 1H), 2.79 - 2.98 (m, 2H), 1.99 - 2.21 (m, 2H), 1.47 (s, 9H), 1.42 (t,  $J = 7.2$  Hz, 3H).

**Step 4:** *(±)-(trans)-tert-butyl 4-(4-(((benzyloxy)carbonyl)amino)-5-(hydroxymethyl)-1H-pyrazol-1-yl)-3-fluoro-piperidine-1-carboxylate*. To a solution of *(±)-(trans)-tert-butyl 4-(4-(((benzyloxy)carbonyl)amino)-5-(ethoxycarbonyl)-1H-pyrazol-1-yl)-3-fluoro-piperidine-1-carboxylate* (4.62 g, 9.43 mmol) in THF/MeOH (100 mL/10 mL) was added  $\text{NaBH}_4$  (2.87 g, 75.4 mmol) in portions at 0 °C. After addition, the mixture was warmed to room temperature and stirred for 1 hour. The mixture was poured into Satur.  $\text{NH}_4\text{Cl}$  (100 mL) and extracted with EtOAc (50 mL $\times$ 3). The combined organic layers were washed with brine, dried over  $\text{Na}_2\text{SO}_4$  and concentrated to give the title compound (4.29 g, 100% yield) as a white solid. LC-MS: 331 [M+H-118]<sup>+</sup>.  $^1\text{H}$  NMR (300 MHz,  $\text{CDCl}_3$ ):  $\delta$  7.42 (s, 1H), 7.36 - 7.38 (m, 5H), 6.36 (s, 1H), 5.14 - 5.23 (m, 2H), 4.74 - 4.98 (m, 1H), 4.55 - 4.70 (m, 1H), 4.33 - 4.45 (m, 1H), 4.11 - 4.29 (m, 1H), 3.48 (s, 2H), 2.79 - 2.96 (m, 2H), 2.20 - 2.34 (m, 1H), 1.98 - 2.10 (m, 1H), 1.47 (s, 9H).

**Step 5:** *(±)-(trans)-tert-butyl 4-(4-(((benzyloxy)carbonyl)amino)-5-formyl-1H-pyrazol-1-yl)-3-fluoropiperidine-1-carboxylate*. A mixture of *(±)-(trans)-tert-butyl 4-(4-(((benzyloxy)carbonyl)amino)-5-(hydroxymethyl)-1H-pyrazol-1-yl)-3-fluoro-piperidine-1-carboxylate* (1.66 g, 3.71 mmol) and  $\text{MnO}_2$  (2.90 g, 33.3 mmol) in  $\text{CHCl}_3$  was stirred at 70 °C for 5 hours. The mixture was cooled to room temperature and then filtered. The filtrate was concentrated and the crude was purified by column chromatography on silica gel (PE: EA= 10: 1~ 0: 1) to give the title compound (1.49 g, 90% yield) as colorless oil. LC-MS: 391 [M+H-56]<sup>+</sup>.  $^1\text{H}$  NMR (300 MHz,  $\text{CDCl}_3$ ):  $\delta$  10.01 (s, 1H), 8.55 (s, 1H), 8.18 (s, 1H), 7.35 - 7.39 (m, 5H), 5.22 (s, 2H), 4.61 - 4.84 (m, 1H), 4.55 - 4.58 (m, 2H), 4.20 - 4.35 (m, 1H), 2.82 - 2.93 (m, 2H), 2.38 - 2.51 (m, 1H), 2.07 - 2.11 (m, 1H), 1.48 (s, 9H).

**Step 6:** *(±)-(trans)-tert-butyl 4-(4-(((benzyloxy)carbonyl)amino)-5-(difluoromethyl)-1H-pyrazol-1-yl)-3-fluoro-piperidine-1-carboxylate*. To a solution of *(±)-(trans)-tert-butyl 4-(4-(((benzyloxy)carbonyl)amino)-5-formyl-1H-pyrazol-1-yl)-3-fluoropiperidine-1-carboxylate* (1.49 g, 3.34 mmol) in dry DCM (40 mL) was added dropwise DAST (3.23 g, 20.0 mmol) at -78 °C under  $\text{N}_2$ . After addition, the mixture was warmed to room temperature and stirred for 2 hour. The mixture was poured into Satur.  $\text{NaHCO}_3$  (100 mL)



in an ice-bath and stirred for 10 min, then extracted with DCM (20 mL x3). The combined organic layers were dried over Na<sub>2</sub>SO<sub>4</sub>, concentrated and purified by column chromatography on silica gel (PE: EA = 10: 1) to give the title compound (676 mg, 43% yield) as a yellow solid. LC-MS: 413 [M+H]<sup>+</sup>. <sup>1</sup>H NMR (300 MHz, CDCl<sub>3</sub>): δ 7.89 (s, 1H), 7.35 - 7.38 (m, 5H), 6.88 (t, *J* = 56.8 Hz, 1H), 6.63 (s, 1H), 5.19 (s, 2H), 4.74 - 4.99 (m, 1H), 4.47 - 4.62 (m, 1H), 4.17 - 4.33 (m, 2H), 2.78 - 2.90 (m, 2H), 2.20 - 2.33 (m, 1H), 1.99 - 2.06 (m, 1H), 1.47 (s, 9H).

**Step 7:** (±)-(trans)-benzyl (5-(difluoromethyl)-1-(3-fluoro-1-(oxetan-3-yl)piperidin-4-yl)-1H-pyrazol-4-yl) carbamate. To a solution of (±)-(trans)-tert-butyl 4-(4-(((benzyloxy)carbonyl)amino)-5-(difluoromethyl)-1H-pyrazol-1-yl)-3-fluoro-piperidine-1-carboxylate (676 mg, 1.44 mmol) in DCM (20 mL) was added HCl/dioxane (4 mL, 6 N). The mixture was stirred at room temperature for 30 min and then concentrated. The residue was diluted with 1,2-dichloroethane (20 mL), oxetan-3-one (624 mg, 8.67 mmol) was added, followed by NaBH (OAc)<sub>3</sub> (1.84 g, 8.67 mmol). The reaction was stirred at room temperature for 1 hour. The mixture was quenched with Satur. NaHCO<sub>3</sub> (50 mL) and extracted with DCM (20 mL x3). The combined organic layers were concentrated and purified by column chromatography on silica gel (DCM: MeOH= 100: 1) to give the title compound (588 mg, 96% yield) as a yellow solid. LC-MS: 425 [M+H]<sup>+</sup>. <sup>1</sup>H NMR (300 MHz, CDCl<sub>3</sub>): δ 7.90 (s, 1H), 7.34 - 7.39 (m, 5H), 6.87 (t, *J* = 40.8 Hz, 1H), 6.60 (s, 1H), 5.20 (s, 2H), 4.91 - 5.09 (m, 1H), 4.58 - 4.69 (m, 4H), 4.10 - 4.19 (m, 1H), 3.61 - 3.67 (m, 1H), 3.18 - 3.22 (m, 1H), 2.81 - 2.84 (m, 1H), 2.36 - 2.45 (m, 1H), 2.01 - 2.11 (m, 3H).

**Step 8:** (±)-(trans)-5-(difluoromethyl)-1-(3-fluoro-1-(oxetan-3-yl)piperidin-4-yl)-1H-pyrazol-4-amine. A mixture of (±)-(trans)-benzyl (5-(difluoromethyl)-1-(3-fluoro-1-(oxetan-3-yl)piperidin-4-yl)-1H-pyrazol-4-yl) carbamate (588 mg, 1.39 mmol) and Pd/C (10%, 100 mg) in MeOH/THF (10 mL/10 mL) was stirred at room temperature under H<sub>2</sub> for 1 hour. The suspension was filtered and the filtrate was concentrated. The crude was purified by column chromatography on silica gel (DCM: MeOH= 100: 1~50:1) to give the title compound (275 mg, 68% yield) as a yellow solid. <sup>1</sup>H NMR (300 MHz, CDCl<sub>3</sub>): δ 7.21 (s, 1H), 6.83 (dd, *J* = 56.4, 52.8 Hz, 1H), 4.86 - 5.11 (m, 1H), 4.57 - 4.69 (m, 4H), 4.00 - 4.15 (m, 1H), 3.58 - 3.67 (m, 1H), 3.13 - 3.19 (m, 2H), 2.79 - 2.82 (m, 1H), 2.27 - 2.41 (m, 1H), 1.98 - 2.01 (m, 3H).

**Step 9:** (trans)-N-(5-(difluoromethyl)-1-(3-fluoro-1-(oxetan-3-yl)piperidin-4-yl)-1H-pyrazol-4-yl)-4-ethoxy-7H-pyrrolo[2,3-d]pyrimidin-2-amine. A mixture of (±)-(trans)-5-(difluoromethyl)-1-(3-fluoro-1-(oxetan-3-yl)piperidin-4-yl)-1H-pyrazol-4-amine (275 mg, 0.95 mmol), 2-chloro-4-ethoxy-7H-pyrrolo[2,3-d]pyrimidine (374 mg, 1.90 mmol), Pd<sub>2</sub>(dba)<sub>3</sub> (174 mg, 0.19 mmol), X-phos (181 mg, 0.38 mmol) and K<sub>2</sub>CO<sub>3</sub> (393 mg, 2.85 mmol) in dioxane (20 mL) was stirred at 110 °C under N<sub>2</sub> for 4 hours. The mixture was concentrated and the crude purified by column chromatography on silica gel (DCM: MeOH= 100: 1 to 50: 1) and C18 column (15~60 % CH<sub>3</sub>CN in water) to give the racemic product (141 mg, 33% yield) as a white solid, which was further separated by chiral column (chiralpak: Column ID (4.6 × 250 mm, 5 μm), phase: Hex: EtOH = 70: 30). to give the title compounds **35** (t<sub>R</sub> = 13.035 min, 63 mg) and **36** (t<sub>R</sub> = 14.930 min, 59 mg).

**35:** LC-MS: 452 [M+H]<sup>+</sup>. t<sub>R</sub> = 4.209 min (LCMS condition 3).

Chiral HPLC:  $t_R$ =13.035mins. (chiralpak: Column ID (4.6 × 250 mm, 5  $\mu$ m), phase: Hex: EtOH = 70: 30) unknown absolute stereochemistry

$^1\text{H}$  NMR (400 MHz, DMSO- $d_6$ ):  $\delta$  11.36 (br., 1H), 8.71 (s, 1H), 8.09 (s, 1H), 7.13 - 7.56 (m, 1H), 6.96 (dd,  $J$  = 2.0, 3.2 Hz, 1H), 6.27 (dd,  $J$  = 2.0, 3.2 Hz, 1H), 4.87 - 5.34 (m, 1H), 4.54 - 4.62 (m, 2H), 4.32 - 4.52 (m, 5H), 3.60 (t,  $J$  = 6.4 Hz, 1H), 3.16 - 3.27 (m, 1H), 2.79 (d,  $J$  = 4.8 Hz, 1H), 1.86 - 2.20 (m, 4H), 1.38 (t,  $J$  = 7.2 Hz, 3H).  $^{13}\text{C}$  NMR (101 MHz, DMSO- $d_6$ ):  $\delta$  162.9, 156.3, 154.7, 134.3, 124.9, 120.9, 109.0, 98.7, 90.1, 88.3, 74.9, 74.8, 62.1, 61.8, 58.2, 52.7, 48.0, 30.9, 15.1.  $^{19}\text{F}$  NMR (376 MHz, DMSO- $d_6$ ):  $\delta$  -111.3 (s, 2F), -187.1 (s, 1F).

**36**: LC-MS: 452  $[\text{M}+\text{H}]^+$ .  $t_R$ = 4.209 min (LCMS condition 3).

Chiral HPLC:  $t_R$ =14.93 mins. (chiralpak: Column ID (4.6 × 250 mm, 5  $\mu$ m), phase: Hex: EtOH = 70: 30) unknown absolute stereochemistry

$^1\text{H}$  NMR (400 MHz, DMSO- $d_6$ ):  $\delta$  11.36 (br. s., 1H), 8.71 (s, 1H), 8.09 (s, 1H), 7.18 - 7.59 (m, 1H), 6.96 (dd,  $J$  = 2.0, 3.2 Hz, 1H), 6.27 (dd,  $J$  = 2.0, 3.2 Hz, 1H), 4.90 - 5.26 (m, 1H), 4.54 - 4.60 (m, 2H), 4.32 - 4.52 (m, 5H), 3.60 (t,  $J$  = 6.4 Hz, 1H), 3.20 - 3.27 (m, 1H), 2.79 (d,  $J$  = 5.2 Hz, 1H), 1.97 - 2.15 (m, 4H), 1.38 (t,  $J$  = 7.2 Hz, 3H).  $^{13}\text{C}$  NMR (101 MHz, DMSO- $d_6$ ):  $\delta$  162.9, 156.3, 154.7, 134.3, 124.9, 120.9, 108.9, 98.7, 98.7, 90.1, 88.3, 74.9, 74.8, 62.1, 61.8, 58.2, 52.7, 30.9, 15.1.  $^{19}\text{F}$  NMR (376 MHz, DMSO- $d_6$ ):  $\delta$  -111.3 (s, 2F), -187.1 (s, 1F).

### **Synthesis of 4-((4-ethoxy-7H-pyrrolo[2,3-*d*]pyrimidin-2-yl)amino)-1-((3*R*,4*R*)-3-fluoro-1-(oxetan-3-yl)piperidin-4-yl)-1*H*-pyrazole-5-carbonitrile (37)**

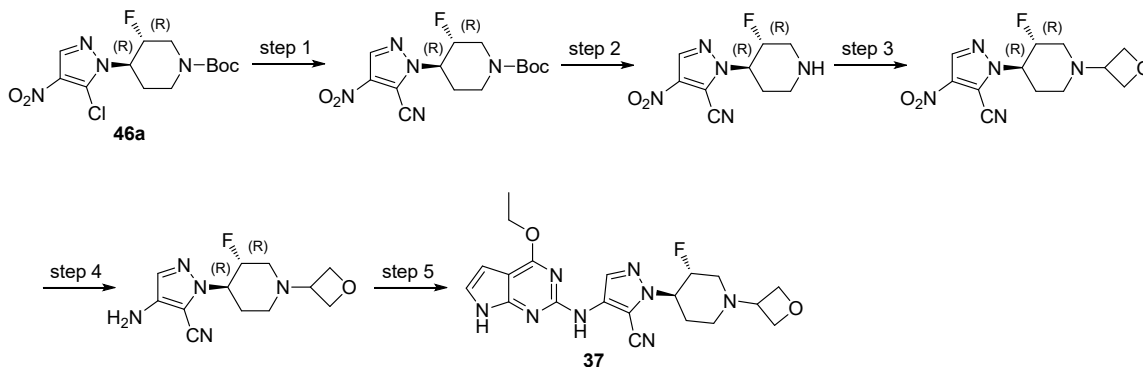

**Step 1:** *(3*R*,4*R*)-tert-butyl 4-(5-cyano-4-nitro-1*H*-pyrazol-1-yl)-3-fluoropiperidine-1-carboxylate*. To a solution of **46a** (590 mg, 1.69 mmol) in DMF (50 mL) was added NaCN (150 mg, 3.06 mmol). The reaction was stirred at 70 °C for 2 hours. The mixture was quenched by poured into H<sub>2</sub>O (200 mL). The water phase was extracted with EtOAc (50 mL×3). The combined organic layer was washed with water (40 mL×3), brine (20 mL×3), dried over Na<sub>2</sub>SO<sub>4</sub> and concentrated to give the title compound (570 mg, 99 % yield) as yellow oil.  $^1\text{H}$  NMR (300 MHz, CDCl<sub>3</sub>):  $\delta$  8.25 (s, 1H), 4.51 - 4.92 (m, 3H), 4.25 - 4.38 (m, 1H), 2.83 - 2.99 (m, 2H), 2.25 - 2.41 (m, 1H), 2.08 - 2.16 (m, 1H), 1.48 (s, 9H).

**Step 2:** *1-((3*R*,4*R*)-3-fluoropiperidin-4-yl)-4-nitro-1*H*-pyrazole-5-carbonitrile hydrochloride*. To a solution of 5*N* HCl/dioxane (10 mL) was added *(3*R*,4*R*)-tert-butyl 4-(5-cyano-4-nitro-1*H*-pyrazol-1-yl)-3-fluoropiperidine-1-carboxylate* (450 mg, 1.33 mmol) at room temperature. The reaction was stirred for 1 hour at room temperature and then

concentrated to give the title compound (453 mg, 100% yield) as yellow oil. <sup>1</sup>H NMR (300 MHz, DMSO-*d*<sub>6</sub>): δ 9.55 - 9.73 (m, 2H), 8.76 (s, 1H), 5.05 - 5.24 (m, 2H), 3.62 - 3.71 (m, 3H), 3.17 - 3.30 (m, 1H), 2.40 - 2.48 (m, 2H).

**Step 3:** *1-((3R,4R)-3-fluoro-1-(oxetan-3-yl)piperidin-4-yl)-4-nitro-1H-pyrazole-5-carbonitrile*. To a solution of *1-((3R,4R)-3-fluoropiperidin-4-yl)-4-nitro-1H-pyrazole-5-carbonitrile hydrochloride* (453 mg, 1.64 mmol) in MeOH (10 mL) was added oxetan-3-one (300 mg, 4.16 mmol). After stirred for 10 minutes, NaBH<sub>3</sub>CN (200 mg, 2.90 mmol) and AcOH (20 mg, 0.33 mmol) was added. The reaction was stirred at room temperature for 2 hours. The mixture was concentrated and the crude was purified by Prep-TLC (PE: EA = 1:2) to give the title compound (134 mg, 31% yield) as yellow oil. <sup>1</sup>H NMR (300 MHz, CDCl<sub>3</sub>): δ 8.25 (s, 1 H), 4.83 - 5.07 (m, 1H), 4.69 - 4.74 (m, 2H), 4.53 - 4.62 (m, 1H), 4.41 - 4.53 (m, 1H), 3.64 - 3.72 (m, 1H), 3.22 - 3.27 (m, 1H), 2.88 - 2.93 (m, 1H), 2.38 - 2.53 (m, 1H), 2.01 - 2.22 (m, 3H).

**Step 4:** *4-amino-1-((3R,4R)-3-fluoro-1-(oxetan-3-yl)piperidin-4-yl)-1H-pyrazole-5-carbonitrile*. To a solution of *1-((3R,4R)-3-fluoro-1-(oxetan-3-yl)piperidin-4-yl)-4-nitro-1H-pyrazole-5-carbonitrile* (110 mg, 0.372 mmol) in MeOH (8 mL) was added Pd/C (80 mg, 10% wet). The mixture was stirred at room temperature with 1 atm H<sub>2</sub> for 2 hours. The suspension was filtered and washed with MeOH (5 mL). The filtrate was concentrated to give the title compound (67 mg, 68% yield) as yellow oil. <sup>1</sup>H NMR (300 MHz, CDCl<sub>3</sub>): δ 7.20 (s, 1 H), 4.77 - 5.01 (m, 1H), 4.55 - 4.68 (m, 4H), 3.99 - 4.22 (m, 1H), 3.14 - 3.16 (m, 1H), 2.79 - 2.82 (m, 1H), 2.23 - 2.45 (m, 1H), 1.99 - 2.33 (m, 3H).

**Step 5:** *4-((4-ethoxy-7H-pyrrolo[2,3-d]pyrimidin-2-yl)amino)-1-((3R,4R)-3-fluoro-1-(oxetan-3-yl)piperidin-4-yl)-1H-pyrazole-5-carbonitrile*. To a solution of 2-chloro-4-ethoxy-7H-pyrrolo[2,3-d]pyrimidine (65 mg, 0.33 mmol), *4-amino-1-((3R,4R)-3-fluoro-1-(oxetan-3-yl)piperidin-4-yl)-1H-pyrazole-5-carbonitrile* (65 mg, 0.22 mmol), X-phos (21 mg, 0.044 mmol), K<sub>2</sub>CO<sub>3</sub> (91 mg, 0.66 mmol) in dioxane (40 mL) was added Pd<sub>2</sub>(dba)<sub>3</sub> (20 mg, 0.022 mmol). The mixture was stirred overnight at 100 °C under N<sub>2</sub>. The mixture was filtered and the filtrate was concentrated. The crude was purified by prep-HPLC to give the title compound as a white solid (6.2 mg, 7% yield). LC-MS: 427 [M+H]<sup>+</sup>. t<sub>R</sub> = 3.43 min (LCMS condition 3). <sup>1</sup>H NMR (400 MHz, CD<sub>3</sub>OD): δ 8.24 (s, 1H), 6.90 (d, *J* = 3.6 Hz 1H), 6.37 (d, *J* = 3.6 Hz, 1H), 4.89 - 5.05 (m, 1H), 4.74 (t, *J* = 6.8 Hz, 2H), 4.65 (q, *J* = 6.0 Hz, 2H), 4.58 (q, *J* = 7.2 Hz, 2H), 4.40 - 4.49 (m, 1H), 3.69 - 3.75 (m, 1H), 3.26 - 3.31 (m, 1H), 2.92 - 2.95 (m, 1H), 2.34 - 2.41 (m, 1H), 2.14 - 2.34 (m, 3H), 1.47 (t, *J* = 7.2 Hz, 3H).

**Synthesis of 4-((4-ethoxy-7H-pyrrolo[2,3-d]pyrimidin-2-yl)amino)-1-((3S,4S)-3-fluoro-1-(oxetan-3-yl)piperidin-4-yl)-1H-pyrazole-5-carbonitrile (38)**

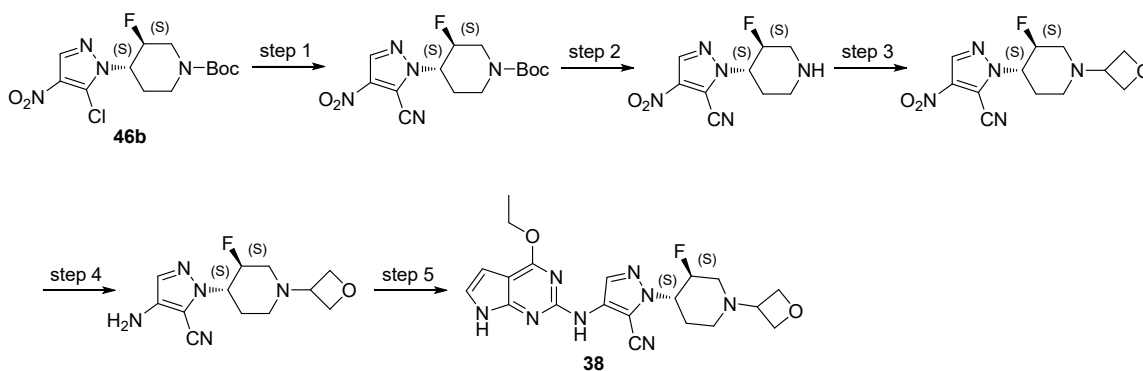

**Step 1:** *(3S,4S)-tert-butyl 4-(5-cyano-4-nitro-1H-pyrazol-1-yl)-3-fluoropiperidine-1-carboxylate*. To a solution of **46b** (1.10 g, 3.17 mmol) in DMF (50 mL) was added NaCN (310 mg, 6.34 mmol). The mixture was stirred at 70°C for 2 hours. The mixture was quenched by poured in H<sub>2</sub>O (200 mL). The water phase was extracted with EtOAc (80 mL×3). The combined organic layer was washed with water (50 mL×3), brine (50 mL×2), dried over Na<sub>2</sub>SO<sub>4</sub> and concentrated to give the title compound (1.0g, 94% yield) as yellow oil.

**Step 2:** *1-((3S,4S)-3-fluoropiperidin-4-yl)-4-nitro-1H-pyrazole-5-carbonitrile hydrochloride*. To a solution of 4N HCl/dioxane (10 mL) was added (3S,4S)-tert-butyl 4-(5-cyano-4-nitro-1H-pyrazol-1-yl)-3-fluoropiperidine-1-carboxylate (1.1 g, 3.26 mmol) at room temperature. The reaction was stirred for 2 hour at room temperature and then concentrated to give the title compound (1.3 g 100% yield) as yellow oil. <sup>1</sup>H NMR: (300 MHz, DMSO-*d*<sub>6</sub>): δ 9.84 (br., 2H), 8.77 (s, 1H), 5.08 - 5.29 (m, 2H), 3.39 - 3.50 (m, 2H), 3.27 - 3.37 (m, 1H), 3.15 - 3.27 (m, 1H), 2.37 - 2.44 (m, 2H).

**Step 3:** *1-((3S,4S)-3-fluoro-1-(oxetan-3-yl)piperidin-4-yl)-4-nitro-1H-pyrazole-5-carbonitrile*. To a solution of 1-((3S,4S)-3-fluoropiperidin-4-yl)-4-nitro-1H-pyrazole-5-carbonitrile hydrochloride (1.10 g, 3.99 mmol) in MeOH (50 mL) was added oxetan-3-one (1.0 g, 13.9 mmol). After stirring at room temperature for 10 minutes, NaBH<sub>3</sub>CN (200 mg, 2.90 mmol) in portions was added followed by AcOH (1 mL). The reaction was stirred at room temperature for 1 hour. The mixture was concentrated and the crude was purified by column chromatography on silica gel (PE: EA= 2:1) to give a white solid. The solid was triturated in a mixed solution (PE: EA= 4: 1, 5 mL) to give the title compound (300 mg, 25% yield) as a white solid. <sup>1</sup>H NMR (300 MHz, CDCl<sub>3</sub>): δ 8.26 (s, 1 H), 4.84 - 5.09 (m, 4H), 4.70 (t, *J* = 6.4 Hz, 2H), 4.60 (td, *J* = 6.4, 2.0 Hz, 1H), 4.41 - 4.54 (m, 1H), 3.64 - 3.72 (m, 1H), 3.23 - 3.30 (m, 1H), 2.88 - 2.94 (m, 1H), 2.39 - 2.53 (m, 1H), 2.10 - 2.22 (m, 3H).

**Step 4:** *4-amino-1-((3S,4S)-3-fluoro-1-(oxetan-3-yl)piperidin-4-yl)-1H-pyrazole-5-carbonitrile*. To a solution of 1-((3S,4S)-3-fluoro-1-(oxetan-3-yl)piperidin-4-yl)-4-nitro-1H-pyrazole-5-carbonitrile (300 mg, 1.02 mmol) in MeOH (20 mL) was added Pd/C (100 mg, 10% wet). The mixture was stirred at room temperature with 1 atm H<sub>2</sub> for 2 hours. The suspension was filtered and washed with MeOH (5 mL), EtOAc (5 mL). The filtrate was concentrated to give the title compound (200 mg, 74% yield) as a yellow solid. <sup>1</sup>H NMR (300 MHz, CDCl<sub>3</sub>): δ 7.23 (s, 1 H), 4.79 - 5.04 (m, 1H), 4.57 - 4.70 (m, 4H), 4.13 - 4.27 (m,

1H), 3.62 - 3.68 (m, 1H), 3.15 - 3.24 (m, 1H), 2.80 - 2.88 (m, 1H), 2.27 - 2.38 (m, 1H), 2.02 - 2.16 (m, 3H).

**Step 5:** 4-((4-ethoxy-7H-pyrrolo[2,3-d]pyrimidin-2-yl)amino)-1-((3S,4S)-3-fluoro-1-(oxetan-3-yl)piperidin-4-yl)-1H-pyrazole-5-carbonitrile. To a solution of 2-chloro-4-ethoxy-7H-pyrrolo[2,3-d]pyrimidine (200 mg, 1.02 mmol), 4-amino-1-((3S,4S)-3-fluoro-1-(oxetan-3-yl)piperidin-4-yl)-1H-pyrazole-5-carbonitrile (200 mg, 0.755 mmol), X-phos (83 mg, 0.174 mmol), K<sub>2</sub>CO<sub>3</sub> (300 mg, 2.17 mmol) in dioxane (20 mL) was added Pd<sub>2</sub>(dba)<sub>3</sub> (78 mg, 0.085 mmol). The mixture was stirred overnight at 100 °C under N<sub>2</sub>. The mixture was filtered and the filtrate was concentrated. The crude was purified by prep-HPLC to give the title compound as a white solid (21.4 mg, 7% yield). LC-MS: 427 [M+H]<sup>+</sup>. t<sub>R</sub> = 3.43 min (LCMS condition 3). <sup>1</sup>H NMR (300 MHz, CD<sub>3</sub>OD): δ 8.23 (s, 1H), 6.93 (d, J = 3.6 Hz, 1H), 6.37 (d, J = 3.6 Hz, 1H), 4.98 - 5.20 (m, 1H), 4.71 - 4.88 (m, 5H), 4.55 (q, J = 7.2 Hz, 1H), 4.14 - 4.22 (m, 1H), 3.60 - 3.69 (m, 1H), 3.33 - 3.38 (m, 1H), 2.77 - 2.97 (m, 2H), 2.33 - 2.53 (m, 2H), 1.44 (t, J = 7.2 Hz, 3H). <sup>13</sup>C NMR (101 MHz, DMSO-*d*<sub>6</sub>): δ 162.9, 155.2, 154.4, 133.8, 131.3, 121.4, 111.4, 106.5, 99.1, 98.7, 90.9, 89.1, 74.9, 74.8, 62.7, 61.9, 58.2, 52.3, 47.7, 29.4, 15.1. <sup>19</sup>F NMR (376 MHz, CD<sub>3</sub>OD): -185.0.

**Synthesis of N-(5-chloro-1-((3R,4R)-3-fluoro-1-(oxetan-3-yl)piperidin-4-yl)-1H-pyrazol-4-yl)-4-ethoxy-7H-pyrrolo[2,3-d]pyrimidin-2-amine (39)**

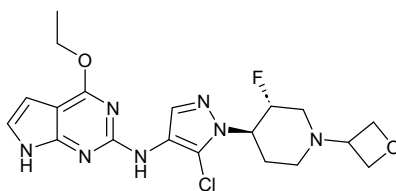

GSK3357679

(*cis*)-*tert*-butyl 3-fluoro-4-hydroxypiperidine-1-carboxylate (**43**). To a solution of *tert*-butyl 3-fluoro-4-oxopiperidine-1-carboxylate (5.0 g, 23 mmol) in MeOH (50 mL) was added NaBH<sub>4</sub> (1.13 g, 29.9 mmol) under ice cooling. The reaction mixture was stirred at this temperature for 2 hrs. The *cis*- and *trans*- isomers were detected by LCMS in a ratio of 3:1. NH<sub>4</sub>Cl aq. (50 mL) was added and the solution was extracted with EtOAc (80 mL×3). The organic layer was dried and concentrated. The major *cis*- product was purified by flash chromatography on C18 to afford desired product (2.2 g, 44 % yield) as a white solid. <sup>1</sup>H NMR (300 MHz, CDCl<sub>3</sub>): δ 4.50-4.68 (m, 1H), 3.89-3.93 (m, 2H), 3.65-3.71 (m, 1H), 3.35-3.44 (m, 1H), 3.17-3.21 (m, 1H), 2.07-2.09 (m, 1H), 1.76-1.86 (m, 2H), 1.45 (s, 9H). LCMS: 220 [M+H]<sup>+</sup>.

(3R,4S)-*tert*-butyl 3-fluoro-4-hydroxypiperidine-1-carboxylate (**44a**) and (3S,4R)-*tert*-butyl 3-fluoro-4-hydroxypiperidine-1-carboxylate (**44b**). (*cis*)-*tert*-butyl 3-fluoro-4-hydroxypiperidine-1-carboxylate **43** (6 g) was separated by chiral-HPLC to give **44a** (enantiomer 1 (3R,4S), t<sub>R</sub> = 11.77 min, 100% ee, 2.2g, 73% recovery) and **44b** (enantiomer 2 (3S,4R), t<sub>R</sub> = 9.55 min, 100% ee, 2.4 g, 80% recovery). Chiral condition: Chiralpak IC 5μm 4.6×250 mm, Hex: EtOH = 90:10, Flow: 1.0 mL/min, 230 nm, T = 30 °C. Absolute

stereochemistry was assigned by aligning chiral HPLC retention times with those previously reported.<sup>1</sup>

*(3R,4R)*-*tert*-butyl 3-fluoro-4-(4-nitro-1*H*-pyrazol-1-yl)piperidine-1-carboxylate (**45a**). To a solution of **44a** (2.2 g, 10.04 mmol), 4-nitro-1*H*-pyrazole (1.19 g, 10.5 mmol), PPh<sub>3</sub> (3.94 g, 15.06 mmol) in THF (50 mL) was added slowly DIAD (3.04 g, 15.06 mmol) under ice cooling. The mixture was stirred overnight at room temperature. Solvent was removed and the residue was dissolved in Et<sub>2</sub>O (50 mL). The suspension was stirred vigorously for 30 min and then filtered. The filtrate was concentrated, and the crude was purified by flash column chromatography on C18 (30~60% CH<sub>3</sub>CN in water) to give the title compound (2.7 g, 85% yield) as yellow oil. LCMS: 313 [M-H]<sup>+</sup>. <sup>1</sup>H NMR (300 MHz, CDCl<sub>3</sub>): δ 8.23 (s, 1H), 8.13 (s, 1H), 4.62-4.87 (m, 2H), 4.17-4.29 (m, 2H), 2.80-2.93 (m, 2H), 2.12-2.33 (m, 2H), 1.47 (s, 9H).

*(3R,4R)*-*tert*-butyl 4-(5-chloro-4-nitro-1*H*-pyrazol-1-yl)-3-fluoropiperidine-1-carboxylate (**46a**). To a solution of **45a** (2.7 g, 8.6 mmol) in THF (50 mL) was added dropwise LiHMDS (17 mL, 17.2 mmol, 1M in THF) at -78 °C under N<sub>2</sub>. The reaction mixture was stirred at this temperature for 1 hour. A solution of hexachloroethane (4.07 g, 17.2 mmol) in THF (20 mL) was added at -78 °C. The reaction mixture was stirred at -78 °C for 20 min under N<sub>2</sub>. NH<sub>4</sub>Cl aq. solution (40 mL) was added and the solution was extracted with EA (50 mL×2). The organic layers were dried and concentrated. The crude was purified by column chromatography on silica gel (PE: EA = 5:1) to give the title compound (2.7 g, 90 % yield) as a yellow solid. <sup>1</sup>H NMR (300 MHz, CDCl<sub>3</sub>): δ 8.24 (s, 1H), 5.00-4.76 (m, 1H), 4.61-4.54 (m, 2H), 4.29-4.24 (m, 1H), 2.91-2.87 (m, 2H), 2.26-2.20 (m, 1H), 2.03-2.01 (m, 1H), 1.48 (s, 9H).

*(3R,4R)*-4-(5-chloro-4-nitro-1*H*-pyrazol-1-yl)-3-fluoropiperidine (**47a**). To a solution of **46a** (2.7 g, 7.75 mmol) in MeOH (20 mL) was added HCl/dioxane (8 M, 20 mL). The reaction mixture was stirred at room temperature for 2 hrs. Solvent was removed and the residue was dissolved in Na<sub>2</sub>CO<sub>3</sub> aqueous solution (30 mL) and extracted with DCM/ MeOH (10:1, 50 mL×3). The combined organic layer was dried and concentrated to give the title compound (1.83 g, 95 % yield) as a yellow solid. <sup>1</sup>H NMR (300 MHz, CDCl<sub>3</sub>): δ 8.23 (s, 1H), 4.74-5.00 (m, 1H), 4.44-4.56 (m, 1H), 3.51-3.56 (m, 1H), 3.16-3.20 (m, 1H), 2.66-2.81 (m, 2H), 2.12-2.27 (m, 1H), 1.97-2.05 (m, 2H).

*(3R,4R)*-4-(5-chloro-4-nitro-1*H*-pyrazol-1-yl)-3-fluoro-1-(oxetan-3-yl)piperidine (**48a**). To a solution of **47a** (500 mg, 2.01 mmol), oxetan-3-one (363 mg, 5.04 mmol) in DCE (16 mL) was added in portions NaBH(OAc)<sub>3</sub> (1.27 g, 6.03 mmol) at room temperature. The reaction was stirred overnight at room temperature. Na<sub>2</sub>CO<sub>3</sub> aqueous solution (60 mL) was added and the mixture was extracted with DCM (80 mL×4). The combined organic layers were dried and concentrated. The crude was purified by column chromatography on silica gel (PE: EA=2:1) to give the title compound (520 mg, 85% yield) as colorless oil. LCMS: 305 [M+H]<sup>+</sup>. <sup>1</sup>H NMR (300 MHz, CDCl<sub>3</sub>): δ 8.24 (s, 1H), 4.94-5.12 (m, 1H), 4.58-4.71 (m, 4H), 4.38-4.48 (m, 1H), 3.63-3.69 (m, 1H), 3.22-3.25 (m, 1H), 2.85-2.89 (m, 1H), 2.30-2.41 (m, 1H), 2.03-2.16 (m, 2H), 1.99-2.01 (m, 1H).

5-chloro-1-((*3R,4R*)-3-fluoro-1-(oxetan-3-yl)piperidin-4-yl)-1*H*-pyrazol-4-amine (**49a**). To a solution of **48a** (5.90 g, 19.4 mmol) in EtOH/H<sub>2</sub>O (50 mL/ 50 mL) was added iron powder (5.4 g, 97 mmol) and NH<sub>4</sub>Cl (5.2 g, 97 mmol). The reaction mixture was stirred overnight

at 50 °C. The solution was filtered through a Celite pad and washed with MeOH (50 mL×3). The combined organic layers were concentrated, dissolved in EtOAc (50 mL) and filtered. The solution was concentrated and purified by flash column chromatography on C18 (10~40% CH<sub>3</sub>CN in water, t<sub>R</sub>= 20 min) to give the title compound (3.5 g, 66% yield) as a white solid. LCMS: 275 [M+H]<sup>+</sup>. <sup>1</sup>H NMR (300 MHz, CDCl<sub>3</sub>): δ 7.29 (s, 1H), 4.88-5.13 (m, 1H), 4.57-4.69 (m, 4H), 4.15-4.28 (m, 1H), 3.59-3.68 (m, 1H), 3.14-3.21 (m, 1H), 2.90 (br., 2H), 2.79-2.83 (m, 1H), 2.20-2.34 (m, 1H), 1.92-2.13 (m, 3H).

*2-chloro-4-ethoxy-7H-pyrrolo[2,3-d]pyrimidine*. A solution of 2,4-dichloro-7H-pyrrolo[2,3-d]pyrimidine (500 mg, 2.66 mmol) and sodium ethoxide (181 mg, 2.66 mmol) in ethanol (8 mL) and THF (8.00 mL) was stirred at 90 °C overnight. The mixture was cooled to room temperature and evaporated. The crude was purified via chromatography on silica gel (PE: EA=25:1) to give the title compound (300 mg, 1.214 mmol, 45.7 % yield) as a white solid. LCMS: 198 [M+H]<sup>+</sup>. <sup>1</sup>H NMR (400 MHz, DMSO-d<sub>6</sub>): δ 12.23 (br. s., 1H), 7.38 (d, J = 3.6 Hz, 1H), 6.50 (d, J = 3.6 Hz, 1H), 4.51 (q, J = 7.2 Hz, 2H), 1.39 (t, J = 7.2 Hz, 3H).

*N-(5-chloro-1-((3R,4R)-3-fluoro-1-(oxetan-3-yl)piperidin-4-yl)-1H-pyrazol-4-yl)-4-ethoxy-7H-pyrrolo[2,3-d]pyrimidin-2-amine (39)*. A mixture of 2-chloro-4-ethoxy-7H-pyrrolo[2,3-d]pyrimidine (258 mg, 1.31 mmol), **49a** (300 mg, 1.09 mmol), X-phos (99 mg, 0.21 mmol), Pd<sub>2</sub>(dba)<sub>3</sub> (90 mg, 0.10 mmol) and K<sub>2</sub>CO<sub>3</sub> (451 mg, 3.27 mmol) in dioxane (30 mL) was stirred overnight at 110 °C under N<sub>2</sub>. The mixture was cooled to room temperature and filtered. The filter was concentrated and the crude was purified by flash chromatography on C18 (20~50% CH<sub>3</sub>CN in water) to give crude product (200 mg, 50 % yield) as a light yellow solid, which was further purified by prep-HPLC to give the title compound **39** as a white solid (100 mg, 99.5 % ee). LCMS: 436 [M+H]<sup>+</sup>. t<sub>R</sub> = 3.85 mins (LCMS condition 3). Chiral HPLC: t<sub>R</sub> = 6.87 mins (ID, CO<sub>2</sub>: MeOH = 70:30, Flow: CO<sub>2</sub> Flow rate: 2.1, Co-solvent: 0.899, back pressure: 100, T = 39.9 °C). <sup>1</sup>H NMR (400 MHz, DMSO-d<sub>6</sub>): δ 11.31 (s, 1H), 8.21 (s, 1H), 7.90 (s, 1H), 6.90 (d, J = 2.8 Hz, 1H), 6.23 (d, J = 2.8 Hz, 1H), 4.86-5.00 (m, 1H), 4.55-4.58 (m, 2H), 4.41-4.51 (m, 5H), 3.61-3.57 (m, 1H), 3.17-3.23 (m, 1H), 2.77-2.79 (m, 1H), 2.09-2.16 (m, 3H), 1.94-1.97 (m, 1H), 1.34 (t, J = 6.8 Hz, 3H). <sup>13</sup>C NMR (101 MHz, DMSO-d<sub>6</sub>): δ 162.9, 157.0, 155.0, 136.7, 120.6, 120.4, 120.0, 98.6, 98.4, 90.4, 88.7, 74.9, 74.8, 61.6, 59.8, 58.3, 52.5, 47.9, 29.7, 15.1. <sup>19</sup>F NMR (376 MHz, DMSO-d<sub>6</sub>): δ -186.6. HRMS (ESI): m/z calcd for C<sub>19</sub>H<sub>23</sub>ClFN<sub>7</sub>O<sub>2</sub> [M+H]<sup>+</sup> + 436.1664, found [M+H]<sup>+</sup> + 436.1665.

<sup>1</sup>H NMR (400 MHz, DMSO-d<sub>6</sub>) of compound 39

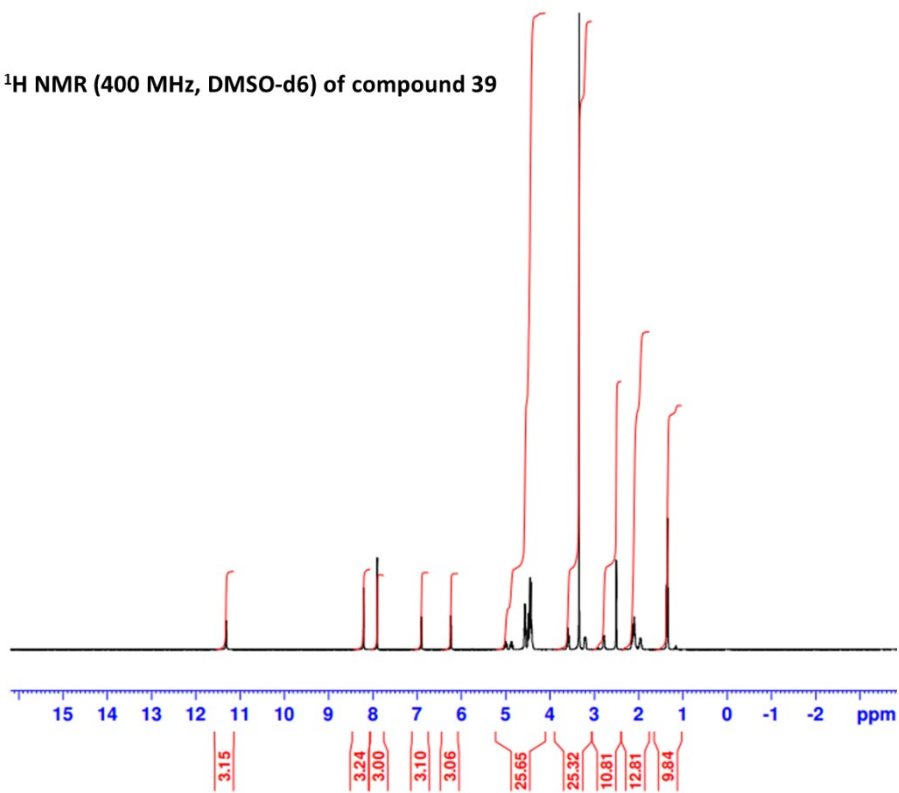

<sup>13</sup>C NMR (101 MHz, DMSO-d<sub>6</sub>) of compound 39

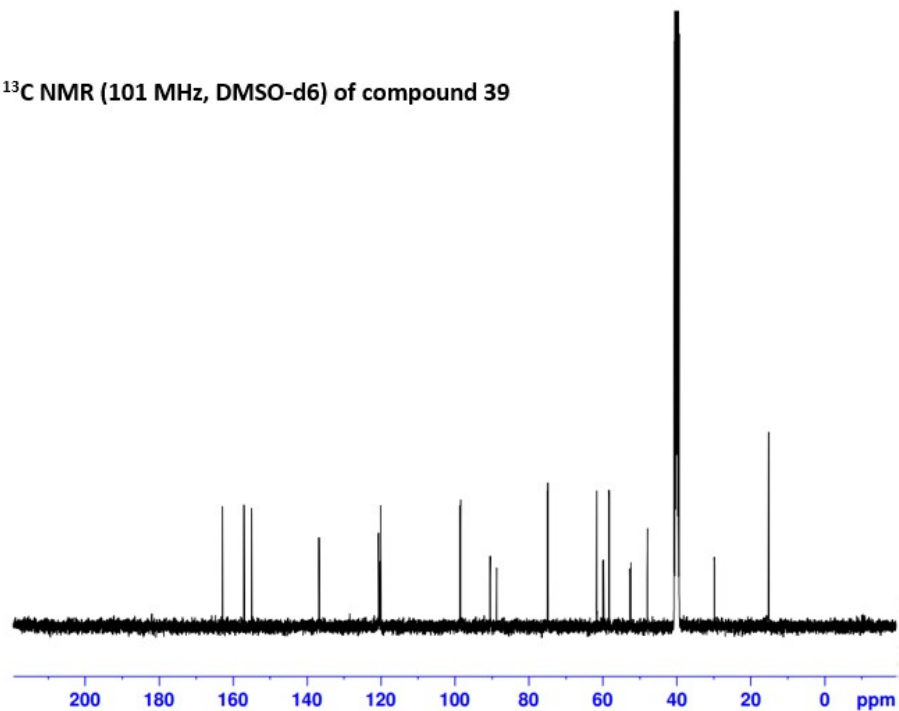



**$^{19}\text{F}$  NMR (376 MHz, DMSO- $d_6$ ) of compound 39**

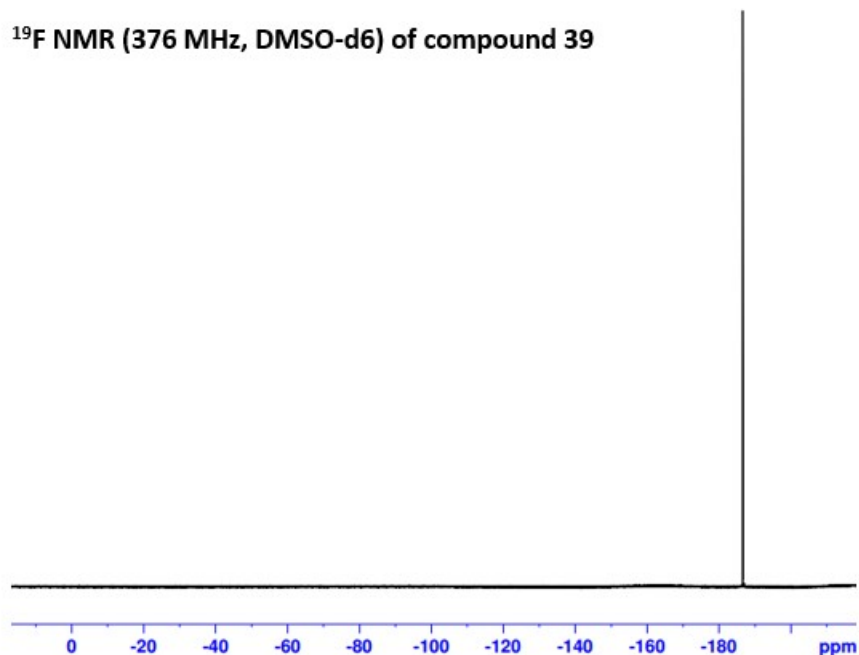

**Analytical Chiral HPLC of compound 39**

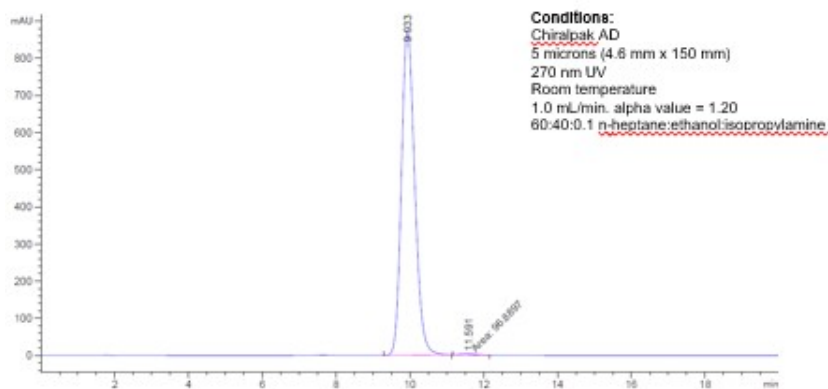

**Area Percent Report**

Sorted By : Signal  
 Multiplier : 1.0000  
 Dilution : 1.0000  
 Use Multiplier & Dilution Factor with ISTDs

Signal 1: DAD1 F, Sig=270,4 Ref=off

| Peak # | RetTime [min] | Type | Width [min] | Area [mAU*s] | Height [mAU] | Area %  |
|--------|---------------|------|-------------|--------------|--------------|---------|
| 1      | 9.933         | BB   | 0.3906      | 2.18825e4    | 872.49805    | 99.5592 |
| 2      | 11.591        | MM   | 0.4821      | 96.88973     | 3.34985      | 0.4408  |

Totals : 2.19794e4 875.84790

## Analytical Chiral HPLC of compound 39 and 40 racemic mixture

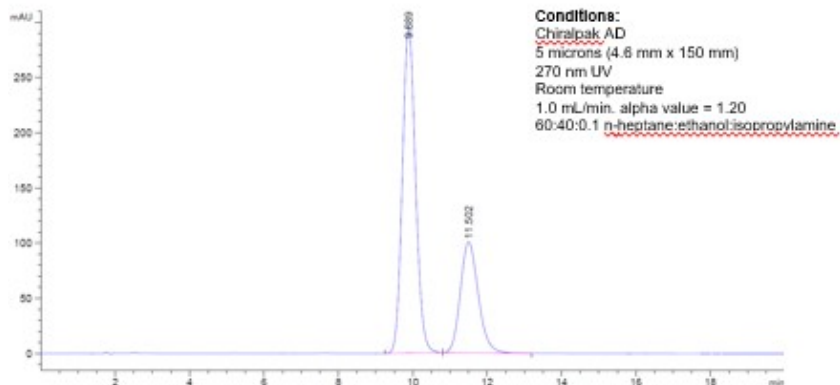

### Area Percent Report

Sorted By : Signal  
 Multiplier : 1.0000  
 Dilution : 1.0000  
 Use Multiplier & Dilution Factor with ISTDs

Signal 1: DAD1 F, Sig=270,4 Ref=off

| Peak #   | RetTime [min] | Type | Width [min] | Area [mAU*s] | Height [mAU] | Area %  |
|----------|---------------|------|-------------|--------------|--------------|---------|
| 1        | 9.933         | BB   | 0.3906      | 2.18825e4    | 872.49805    | 99.5592 |
| 2        | 11.591        | MM   | 0.4821      | 96.88973     | 3.34985      | 0.4408  |
| Totals : |               |      |             | 2.19794e4    | 875.84790    |         |

## Synthesis of N-(5-chloro-1-((3S,4S)-3-fluoro-1-(oxetan-3-yl)piperidin-4-yl)-1H-pyrazol-4-yl)-4-ethoxy-7H-pyrrolo[2,3-d]pyrimidin-2-amine (40)

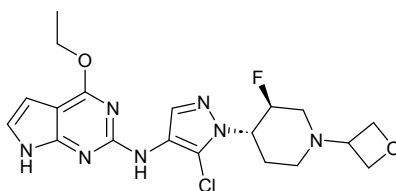

(3S,4S)-tert-butyl 3-fluoro-4-(4-nitro-1H-pyrazol-1-yl)piperidine-1-carboxylate (**45b**). To a solution of **44b** (3.40 g, 15.5 mmol), 4-nitro-1H-pyrazole (1.75 g, 15.5 mmol), PPh<sub>3</sub> (6.10 g, 23.3 mmol) in THF (100 mL) was added slowly DIAD (4.71 g, 23.3 mmol) at 0°C. The mixture was stirred overnight at room temperature. The mixture was concentrated, the residue was dissolved in EtOAc (50 mL) and then n-hexane (100 mL) was added. The suspension was stirred vigorously for 1 hour and then filtered. The filtrate was concentrated, and the crude was purified by column chromatography on C18 (20~80% CH<sub>3</sub>CN in water) to give the title compound (4.05 g, 83% yield) as yellow oil. <sup>1</sup>H NMR (300

MHz, CDCl<sub>3</sub>):  $\delta$  8.22 (s, 1H), 8.12 (s, 1H), 4.57-4.86 (m, 2H), 4.18-4.29 (m, 2H), 2.85 (br., 2H), 2.12-2.28 (m, 2H), 1.48 (s, 9H).

*(3S,4S)-tert-butyl 4-(5-chloro-4-nitro-1H-pyrazol-1-yl)-3-fluoropiperidine-1-carboxylate (46b)*. To a solution of **45b** (2.7 g, 8.6 mmol) in THF (50 mL) was added LiHMDS (26 mL, 25.8 mmol, 1M in THF) at -78 °C under N<sub>2</sub>. The reaction mixture was stirred at -78 °C for 40 min. A solution of hexachloroethane (4.07 g, 17.2 mmol) in THF (20 mL) was added and the reaction was stirred at -78 °C for 2 hrs under N<sub>2</sub>. Aq. NH<sub>4</sub>Cl solution (40 mL) was added and the solution was extracted with EtOAc (50 mL $\times$ 2). The organic layers were dried and concentrated. The crude was purified by column chromatography on silica gel (PE: EA = 5:1) to give the title compound (1.2 g, 40 % yield) as a yellow solid. <sup>1</sup>H NMR (300 MHz, CDCl<sub>3</sub>):  $\delta$  8.23 (s, 1H), 4.75-4.99 (m, 1H), 4.48-4.61 (m, 2H), 4.22-4.32 (m, 1H), 2.83-2.99 (m, 2H), 2.16-2.31 (m, 1H), 1.96-2.03 (m, 1H), 1.48 (s, 9H).

*(3S,4S)-4-(5-chloro-4-nitro-1H-pyrazol-1-yl)-3-fluoropiperidine (47b)*. To a solution of **46b** (1.2 g, 3.44 mmol) in MeOH (6 mL) was added HCl/dioxane (8 M, 6 mL). The reaction was stirred at room temperature for 2 hrs. Solvent was evaporated, and the residue was dissolved in Na<sub>2</sub>CO<sub>3</sub> aqueous solution (20 mL) and extracted with DCM/MeOH (10:1, 50 mL $\times$ 3). The combined organic layers were dried and concentrated to give the title compound (820 mg, 96 % yield). <sup>1</sup>H NMR (300 MHz, CDCl<sub>3</sub>):  $\delta$  8.23 (s, 1H), 4.75-4.99 (m, 1H), 4.44-4.56 (m, 1H), 3.51-3.58 (m, 1H), 3.15-3.23 (m, 1H), 2.68-2.81 (m, 2H), 2.13-2.27 (m, 1H), 1.97-2.06 (m, 1H).

*(3S,4S)-4-(5-chloro-4-nitro-1H-pyrazol-1-yl)-3-fluoro-1-(oxetan-3-yl)piperidine (48b)*. To a solution of **47a** (400 mg, 1.61 mmol), oxetan-3-one (290 mg, 4.03 mmol) in DCE (15 mL) was added in portions NaBH(OAc)<sub>3</sub> (1.02 g, 4.83 mmol) at room temperature. The reaction mixture was stirred overnight at room temperature. Na<sub>2</sub>CO<sub>3</sub> aqueous solution (30 mL) was added and extracted with DCM (30 mL $\times$ 5). The combined organic layers were dried and concentrated. The crude was purified by column chromatography on silica gel (PE: EA = 1:1) to give the title compound (410 mg, 83% yield) as a light yellow solid. LCMS: 305 [M+H]<sup>+</sup>. <sup>1</sup>H NMR (300 MHz, CDCl<sub>3</sub>):  $\delta$  8.24 (s, 1H), 4.91-5.16 (m, 1H), 4.69 (t, J = 6.6 Hz, 2H), 4.58-4.63 (m, 2H), 4.37-4.49 (m, 1H), 3.62-3.70 (m, 1H), 3.20-3.27 (m, 1H), 2.85-2.90 (m, 1H), 2.28-2.43 (m, 1H), 2.08-2.18 (m, 2H), 1.96-2.02 (m, 1H).

*5-chloro-1-((3S,4S)-3-fluoro-1-(oxetan-3-yl)piperidin-4-yl)-1H-pyrazol-4-amine (49b)*. To a solution of **48b** (410 mg, 1.35 mmol) in EtOH/H<sub>2</sub>O (4 mL/ 4mL) was added iron powder (151 mg, 2.70 mmol) and NH<sub>4</sub>Cl (150 mg, 2.70 mmol). The reaction was stirred overnight at room temperature. The solution was filtered through a Celite pad and washed with MeOH (10 mL $\times$ 3). The combined organic layers were concentrated, and the crude was purified by column chromatography on C18 (20~50% CH<sub>3</sub>CN in water) to give the title compound (260 mg, 70% yield) as red oil. LCMS: 275 [M+H]<sup>+</sup>. <sup>1</sup>H NMR (300 MHz, CDCl<sub>3</sub>):  $\delta$  7.29 (s, 1H), 4.88-5.13 (m, 1H), 4.58-4.69 (m, 4H), 4.15-4.28 (m, 1H), 3.59-3.68 (m, 1H), 3.15-3.21 (m, 1H), 2.76-2.97 (m, 3H), 2.20-2.34 (m, 1H), 1.92-2.13 (m, 3H).

*N-(5-chloro-1-((3S,4S)-3-fluoro-1-(oxetan-3-yl)piperidin-4-yl)-1H-pyrazol-4-yl)-4-ethoxy-7H-pyrrolo[2,3-d]pyrimidin-2-amine (40)*. A mixture of 2-chloro-4-ethoxy-7H-pyrrolo[2,3-d]pyrimidine (181 mg, 0.92 mmol), **49b** (210 mg, 0.76 mmol), X-phos (71 mg, 0.15 mmol), Pd<sub>2</sub>(dba)<sub>3</sub> (70 mg, 0.07 mmol) and K<sub>2</sub>CO<sub>3</sub> (314 mg, 2.28 mmol) in dioxane (20 mL) was stirred at 110 °C under N<sub>2</sub> for 8 hrs. The mixture was cooled to room temperature and

filtered. The filtrate was concentrated and the crude was purified by flash chromatography on C18 (20~50% CH<sub>3</sub>CN in water) to give crude product (100 mg, 30 % yield) as a light yellow solid, which was further purified by prep-HPLC to give the title compound (60 mg, 99.7 % ee) as a white solid. LCMS: 436 [M+H]<sup>+</sup>. *t<sub>R</sub>* = 3.85 mins (LCMS condition 3). Chiral HPLC: *t<sub>R</sub>* = 8.92 mins (ID, CO<sub>2</sub>: MeOH = 70:30, Flow: CO<sub>2</sub> Flow rate: 2.1, Co-solvent: 0.899, back pressure: 100, T = 39.9 °C). <sup>1</sup>H NMR (400 MHz, DMSO-d<sub>6</sub>): δ 11.31 (s, 1H), 8.20 (s, 1H), 7.90 (s, 1H), 6.90 (d, *J* = 2.8 Hz, 1H), 6.23 (d, *J* = 2.8 Hz, 1H), 4.86-5.00 (m, 1H), 4.54-4.58 (m, 2H), 4.39-4.51 (m, 5H), 3.57-3.60 (m, 1H), 3.18-3.21 (m, 1H), 2.77-2.79 (m, 1H), 2.07-2.16 (m, 3H), 1.94-1.96 (m, 1H), 1.35 (t, *J* = 6.8 Hz, 3H). <sup>13</sup>C NMR (101 MHz, DMSO-d<sub>6</sub>): δ 162.9, 157.0, 155.0, 136.7, 120.6, 120.4, 120.0, 98.6, 98.4, 90.4, 88.7, 74.9, 74.8, 61.6, 59.8, 58.3, 52.5, 47.9, 29.7, 15.1. <sup>19</sup>F NMR (376 MHz, DMSO-d<sub>6</sub>): δ -186.6.

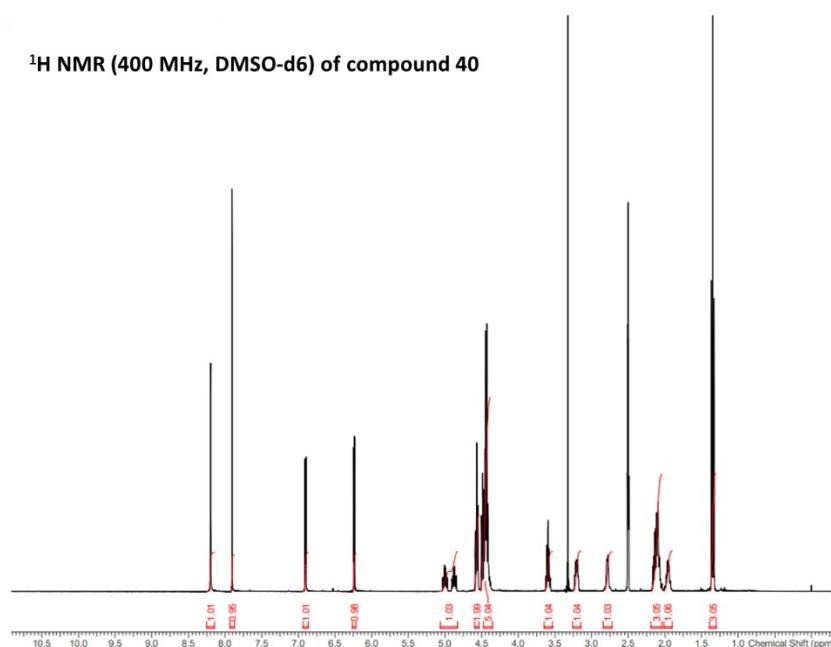

**$^{13}\text{C}$  NMR (101 MHz, DMSO- $d_6$ ) of compound 40**

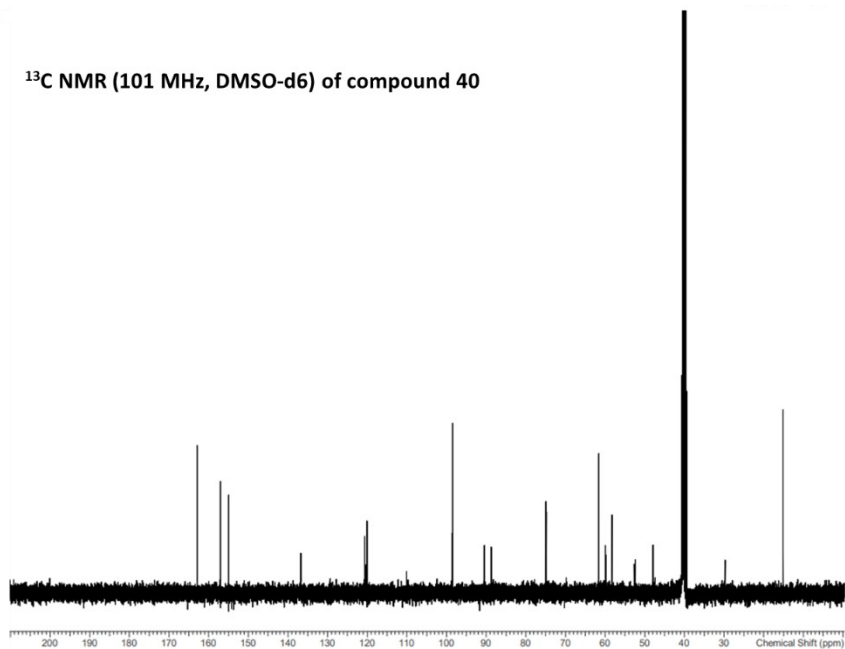

**$^{19}\text{F}$  NMR (376 MHz, DMSO- $d_6$ ) of compound 40**

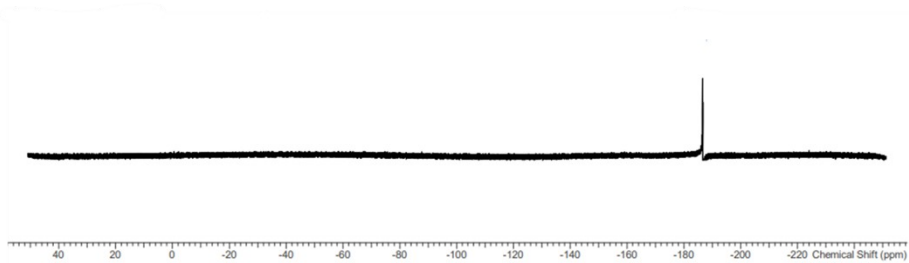

### Chiral HPLC of compound 40

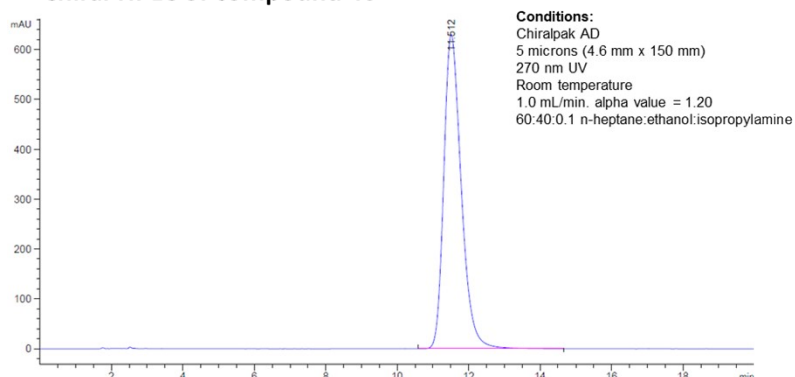

#### Area Percent Report

Sorted By : Signal  
 Multiplier : 1.0000  
 Dilution : 1.0000  
 Use Multiplier & Dilution Factor with ISTDs

Signal 1: DAD1 F, Sig=270,4 Ref=off

| Peak #   | RetTime [min] | Type | Width [min] | Area [mAU*s] | Height [mAU] | Area %   |
|----------|---------------|------|-------------|--------------|--------------|----------|
| 1        | 11.512        | BB   | 0.5212      | 2.13470e4    | 630.17877    | 100.0000 |
| Totals : |               |      |             | 2.13470e4    | 630.17877    |          |

### Synthesis of *cis*-N-(5-chloro-1-(3-fluoro-1-(oxetan-3-yl)piperidin-4-yl)-1H-pyrazol-4-yl)-4-ethoxy-7H-pyrrolo[2,3-d]pyrimidin-2-amine (41 and 42)

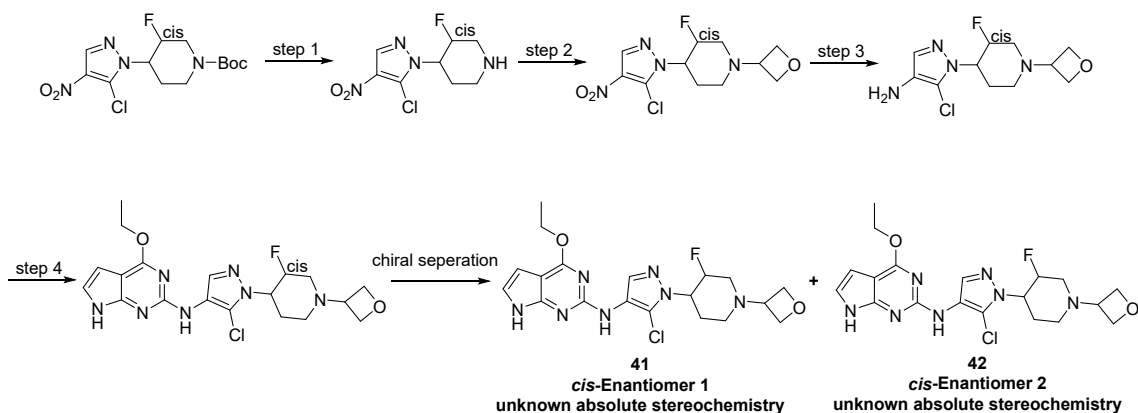

**Step 1:** ( $\pm$ )-*cis*-4-(5-chloro-4-nitro-1H-pyrazol-1-yl)-3-fluoropiperidine. To a solution of ( $\pm$ )-*cis*-tert-butyl 4-(5-chloro-4-nitro-1H-pyrazol-1-yl)-3-fluoropiperidine-1-carboxylate (1.0 g, 2.87 mmol) (according to the synthesis of **33** and **34**) in MeOH (10 mL) was added HCl/dioxane (5.7 M, 10 mL). The reaction mixture was stirred at room temperature for 1 hour. Solvent was removed and the residue was dissolved in aq.  $\text{Na}_2\text{CO}_3$  solution (40 mL)

and extracted with EtOAc (50 mL×3). The organic layers were dried and concentrated to give the title compound as a yellow solid (650 mg, 90% yield). LCMS: 249 [M+H]<sup>+</sup>.

**Step 2:** *(±)-(cis)-4-(5-chloro-4-nitro-1H-pyrazol-1-yl)-3-fluoro-1-(oxetan-3-yl)piperidine*. To a solution of *(±)-(cis)-4-(5-chloro-4-nitro-1H-pyrazol-1-yl)-3-fluoropiperidine* (650 mg, 2.62 mmol), oxetan-3-one (472 mg, 6.55 mmol) in DCE (30 mL) was added in portions NaBH(OAc)<sub>3</sub> (1.66 g, 7.86 mmol) at room temperature. The reaction mixture was stirred at room temperature for 2 hour. Aq. Na<sub>2</sub>CO<sub>3</sub> solution (40 mL) was added and the mixture was extracted with DCM (50 mL×3). The organic layers were dried and concentrated. The crude was purified by column chromatography on silica gel (PE: EA=1:2) to give the title compound (640 mg, 84% yield) as a white solid. LCMS: 305 [M+H]<sup>+</sup>. <sup>1</sup>H NMR (300 MHz, CDCl<sub>3</sub>): δ 8.21 (s, 1H), 4.83 - 4.99 (m, 1H), 4.55 - 4.70 (m, 5H), 3.67 - 3.75 (m, 1H), 3.02 - 3.16 (m, 2H), 2.80 - 2.93 (m, 1H), 2.24 - 2.42 (m, 2H), 1.98 - 2.08 (m, 1H).

**Step 3:** *(±)-(cis)-5-chloro-1-(3-fluoro-1-(oxetan-3-yl)piperidin-4-yl)-1H-pyrazol-4-amine*. To a solution of *(±)-(cis)-4-(5-chloro-4-nitro-1H-pyrazol-1-yl)-3-fluoro-1-(oxetan-3-yl)piperidine* (640 mg, 2.10 mmol) in EtOH/H<sub>2</sub>O (10 mL/10 mL) was added iron powder (707 mg, 12.6 mmol) and NH<sub>4</sub>Cl (670 mg, 12.6 mmol). The reaction was stirred overnight at 50 °C. The mixture was filtered through a Celite pad. The solution was concentrated and purified by flash column chromatography on C18 (0~20% CH<sub>3</sub>CN in water) to give the title compound (400 mg, 80 % yield) as red oil. LCMS: 275 [M+H]<sup>+</sup>. <sup>1</sup>H NMR (300 MHz, CDCl<sub>3</sub>): δ 7.27 (s, 1H), 4.77 - 4.93 (m, 1H), 4.64 - 4.72 (m, 4H), 4.25 - 4.38 (m, 1H), 3.65 - 3.74 (m, 1H), 2.78 - 3.15 (m, 5H), 2.18 - 2.41 (m, 2H), 1.94 - 1.99 (m, 1H).

**Step 4:** *cis-N-(5-chloro-1-(3-fluoro-1-(oxetan-3-yl)piperidin-4-yl)-1H-pyrazol-4-yl)-4-ethoxy-7H-pyrrolo[2,3-d]pyrimidin-2-amine*. A mixture of 2-chloro-4-ethoxy-7H-pyrrolo[2,3-d]pyrimidine (345 mg, 1.75 mmol), *(±)-(cis)-5-chloro-1-(3-fluoro-1-(oxetan-3-yl)piperidin-4-yl)-1H-pyrazol-4-amine* (400 mg, 1.46 mmol), X-phos (139 mg, 0.29 mmol), Pd<sub>2</sub>(dba)<sub>3</sub> (132 mg, 0.14 mmol) and K<sub>2</sub>CO<sub>3</sub> (604 mg, 4.38 mmol) in dioxane (30 mL) was stirred overnight at 105 °C under N<sub>2</sub>. The mixture was cooled to room temperature and filtered. The filtrate was concentrated and the crude was purified by flash chromatography on C18 (20~50% CH<sub>3</sub>CN in water) to give the racemic product (150 mg, 24 % yield) as a light yellow solid, which was further separated by SFC to give the title compounds **41** (40 mg, t<sub>R</sub> = 5.5 min, 100% ee) and **42** (40 mg, t<sub>R</sub> = 6.5 min, 99% ee)

**41:** LCMS: 436 [M+H]<sup>+</sup>. t<sub>R</sub> = 3.61 mins. (LCMS condition 3)

Chiral HPLC: t<sub>R</sub> = 5.5 mins. (Chiralpak: column OD-H (250 mm×4.6 mm, 5 μm), CO<sub>2</sub>: MeOH (0.2% DEA) = 70:30) unknown absolute stereochemistry

<sup>1</sup>H NMR (400 MHz, DMSO-*d*<sub>6</sub>): δ 11.30 (s, 1H), 8.20 (s, 1H), 7.82 (s, 1H), 6.90 (t, *J* = 2.8 Hz, 1H), 6.23 (dd, *J* = 3.2, 1.6 Hz, 1H), 4.83 - 4.95 (m, 1H), 4.40 - 4.61 (m, 7H), 3.52 - 3.58 (m, 1H), 2.90 - 3.04 (m, 2H), 2.57 - 2.67 (m, 1H), 2.18 - 2.38 (m, 2H), 1.87 - 1.90 (m, 1H), 1.35 (t, *J* = 7.2 Hz, 3H). <sup>13</sup>C NMR (101 MHz, DMSO-*d*<sub>6</sub>): δ 162.9, 156.9, 155.0, 135.6, 120.6, 120.6, 119.1, 98.6, 98.4, 88.2, 86.4, 74.8, 61.6, 58.4, 57.4, 51.8, 47.7, 24.6, 15.1. <sup>19</sup>F NMR (376 MHz, DMSO-*d*<sub>6</sub>): δ -198.6.

**42:** LCMS: 436 [M+H]<sup>+</sup>. t<sub>R</sub> = 3.62 mins. (LCMS condition 3)

Chiral HPLC: t<sub>R</sub> = 6.5 mins. (Chiralpak: column OD-H (250 mm×4.6 mm, 5 μm), CO<sub>2</sub>: MeOH (0.2% DEA) = 70:30) unknown absolute stereochemistry

$^1\text{H}$  NMR (400 MHz,  $\text{DMSO}-d_6$ ):  $\delta$  11.30 (s, 1H), 8.20 (s, 1H), 7.82 (s, 1H), 6.90 (t,  $J = 2.8$  Hz, 1H), 6.23 (dd,  $J = 3.2, 1.6$  Hz, 1H), 4.83 - 4.95 (m, 1H), 4.40 - 4.61 (m, 7H), 3.52 - 3.58 (m, 1H), 2.90 - 3.04 (m, 2H), 2.58 - 2.67 (m, 1H), 2.16 - 2.38 (m, 2H), 1.87 - 1.90 (m, 1H), 1.35 (t,  $J = 7.2$  Hz, 3H).  $^{13}\text{C}$  NMR (101 MHz,  $\text{DMSO}-d_6$ ):  $\delta$  162.9, 157.0, 155.0, 135.6, 120.6, 120.6, 119.1, 98.6, 98.4, 88.2, 86.4, 74.9, 61.6, 58.4, 57.4, 51.8, 47.7, 24.6, 15.1.  $^{19}\text{F}$  NMR (376 MHz,  $\text{DMSO}-d_6$ ):  $\delta$  -198.6.



**Cellular LRRK2 pS935 AlphaScreen assay:** The assay measures the activity of compounds against LRRK2 kinase activity in cells. The observed LRRK2 kinase-dependent modulation of LRRK2 Ser 935 phosphorylation was utilized to develop a quantitative 384 well plate-based immunoassay of LRRK2 Ser935 phosphorylation in the human neuroblastoma cell line SH-SY5Y, engineered to over-express recombinant full length LRRK2 protein. SH-SY5Y cells were grown in DMEM/F12 medium with 10% dialyzed fetal bovine serum and harvested by treatment with 0.5 % trypsin-EDTA for 5 minutes at 37°C followed by centrifugation at 1000rpm for 4 minutes. The cell pellet was suspended in Opti-MEM reduced serum media (Invitrogen) at 200,000 cells/ml and mixed with the BacMam LRRK2 virus at MOI=50. 50 µl cell solutions were then dispensed to each well of a 384-well plate and incubated at 37 °C, 5 % CO<sub>2</sub> for 24 hours. Serial dilutions of test compounds were prepared in Opti-MEM reduced serum media (Invitrogen) and 5.6ul transferred from compound plate to cell assay plate to achieve a top final assay concentration of 10uM. DMSO was used in certain wells as controls. Cells were incubated at 37 °C, 5% CO<sub>2</sub> for 60 minutes. The medium was then removed, and cells lysed by addition of 20ul cell lysis buffer (Cell Signaling Technology) and incubation at 4 °C for 20 minutes. 10ul of antibody/acceptor bead mix [(1/1000 biotinylated-pS935 LRRK2 antibody, 1/1000 total-LRRK2 antibody, 1/100 Acceptor beads in AlphaScreen detection buffer (25mM Hepes (pH 7.4), 0.5% Triton X-100, 1mg/ml Dextran 500 and 0.1% BSA)] was then added to each well and plates incubated for 2 hours at ambient temperature in the dark. 10 µl of donor beads solution (1/33.3 donor beads in AlphaScreen detection buffer) was then added to each well. Following incubation for a further 2 hours at ambient temperature in the dark, plates were read on an EnVision™ plate reader at emission 520-620nm with excitation 680nm. Dose response curve data was based on sigmoidal dose-response model.

**P-gp/Bcrp Permeability Ratio (ER) and Cell Permeability Assay.** Polarized Madin-Darby canine kidney (MDCKII) cells stably transfected with human P-gp (MDCKII-MDR1 cell line) were obtained from The Netherlands Cancer Institute (Amsterdam, The Netherlands). MDCKII-MDR1 cells transduced with BacMam2-BCRP according to experimental protocols reported previously were used for the in vitro transport studies in the Transwell system. The cell culture and transport studies were described previously. The transport of test compounds (3 µM) was measured in duplicates in one direction [apical to basolateral (A→B)] for 90 min in the absence and presence of GF120918 (5 µM, a dual P-gp and BCRP inhibitor). The exact permeability ( $P_{\text{exact}}$ , nm/s) for test compounds across MDCKII monolayers were calculated using the equation reported previously. The permeability ratio is defined as the ratio of permeability of apical-to-basolateral direction in the presence to absence of GF120918. The functionality of human P-gp and Bcrp in this cell line was evidenced by typical ERs of amprenavir (a P-gp specific substrate) and dantrolene (a P-gp specific substrate) greater than 12 and 5, respectively.

## Animal Studies

All studies were conducted in accordance with the GSK Policy on the Care, Welfare and Treatment of Laboratory Animals and were reviewed by the Institutional Animal Care and Use Committee either at GSK or by the ethical review process at the institution where the work was performed.

**Pharmacokinetics and tissue distribution.** Pharmacokinetics and tissue distribution of compounds was evaluated in the male Han-Wistar rats following oral gavage administration at 2 mg/kg, respectively. Test compound was formulated as homogenous suspension in a dosing vehicle containing DMSO: 1% methylcellulose (w/v) =1:99. At each time point post dose (15 min, 0.5h, 1h, 2h, 4h, 7h), blood samples (>60µL/time point/each site) were collected via cardiac puncture, into separate EDTA-K2(0.5M) containers following anaesthesia with isoflurane. 50 uL of blood samples were diluted with 150 µL of deionized H<sub>2</sub>O (1:3), snap frozen on dry ice and further stored at -80°C. Immediately after blood collection, the brains, lungs, and kidneys from all the animals were excised, transferred suitable containers and immediately stored frozen. Brain and kidney were homogenized with 3-fold PBS (w/v) and further stored at -80°C (dilution factor=3.9). Separated calibration curves were prepared in blank blood/water mixture, kidney, brain homogenate respectively. Study samples and their corresponding calibration curves were extracted by protein precipitation. Exact 50 uL sample was aliquot into a clean extract plate and then 150uL of acetonitrile containing analytical internal standard was added to each sample. After mixing and centrifugation, approximately 100uL of supernatant was removed into an injection plate and sample was further diluted with same volume of deionized water. Quantitation of test compound was carried out by UPLC/MS/MS. Brain, lung, and kidney exposure were estimated by area under curve (AUC) up to last time point at 7 hrs. Kp (tissue to blood ratio) of test compounds was evaluated from the ratio of AUC<sub>tissue</sub>/AUC<sub>blood</sub>.

**Dog pharmacokinetic studies.** Oral bioavailability was determined in male Beagle dogs (n = 3) using a crossover study design with a 7-day washout period. Compounds **39** and **40** were administered by 1 hr i.v. infusion (1%DMSO:10% hydroxypropyl-betacyclodextrin, 4 mL/kg) or oral gavage (1% MC, 10 mL/kg). Blood samples (50 µL) were collected at 0.25, 0.5, 1, 1.08, 1.25, 1.5, 2, 3, 5, 8, 24, 32 h (i.v.) or 0, 0.25, 0.5, 1, 2, 4, 7, 24, 32 h (oral gavage) timepoints into separate EDTA-K2(0.5M) containers, diluted with 150 µL of deionized H<sub>2</sub>O (1:3), and snap frozen on dry ice and further stored at -80°C prior to analysis. Blood samples were assayed using protein precipitation followed by UPLC/MS/MS analysis, and the resulting concentration–time data were analyzed by noncompartmental methods.

**Rat pharmacodynamic studies.** Compounds **39** and **40** were dissolved in 1% MC and 8-week-old naïve male Han-rats were assigned to treatment groups. For time course of pharmacodynamic study, rats received oral gavage administration of compound **39** at dose of 3 mg/kg for 0.25, 1, 3, 6, 8, 12 and 24 h (3 rats per time point) or vehicle (1% MC, 3 rats) for 6 h; rats received oral gavage administration of compound **40** at dose of 3

mg/kg for 0.25, 1, 3, 6, 8 and 12h (3 rats per time point) or vehicle (1% MC, 3 rats) for 6 h. For pharmacodynamic assessment, mice were dosed by oral gavage administration of **39** at dose of 5 mg/kg, 10 mg/kg and 30 mg/kg for 4 h (3 rats for each dose) or vehicle (1% MC, 3 rats) for 4h. At the end of the study animals were euthanized to collect 100  $\mu$ L blood (immediately dilute by 300  $\mu$ L distilled deionized H<sub>2</sub>O and completely mix, followed by snap-frozen on dry ice and then exsanguinated by transcranial perfusion of PBS. Tissue samples (lung, kidney, brain) were quickly removed, weighed and snap-frozen on dry ice.

**Mouse pharmacodynamic studies.** Male C57BL/6 mice (~8 weeks old; Charles River (China)) were dosed with **39** at 3, 10 and 15mg/kg p.o. suspended in methycellulose (1% w/v; 10 ml/kg dosing volume). Blood samples (20  $\mu$ L) were collected at 0.25, 1, 2, 4, 6, 8 and 12h post dose from a tail vein into sample tubes containing 15% EDTA-K2, diluted 5-fold with water and mixed by vortexing. At 0.25, 1, 2, 4, 6, 8 and 12h post dose animals were anaesthetised with isoflurane and a blood sample taken and the animals were exsanguinated by transcardial perfusion of chilled PBS or cold saline. Samples of brain, lung and kidney tissues were quickly dissected out, weighed and snap-frozen on dry ice and stored at -80°C until further analysed for either compound concentrations by Mass spectrometry or levels pS935 by an ELISA method.

**Tissue lysis.** For measurement of pS935 tissues were thawed and homogenized in homogenization buffer (10 v/w) This buffer was comprised of RIPA buffer (Sigma-R0278; 150 mM NaCl, 1.0% IGEPAL® CA-630, 0.5% sodium deoxycholate, 0.1% SDS, 50 mM Tris, pH 8.0. ); 1X Halt Protease Inhibitor Cocktail, EDTA-Free ((100X; Pierce, #78437); 1X Halt Phosphatase Inhibitor Cocktail, (Pierce, #78426); 1mM DTT (MW 154.25, stock 50 mg/ml in water, Sigma, #D9779); 1mM Benzamidine (Sigma 12072); 1mM PMSF (Sigma P7626); 1:1000 Okadaic acid (stock 100ng/ $\mu$ L in ethanol, Sigma, # O4511) 1:1000 Calyculin A (stock 100ng/ $\mu$ L in ethanol, Invitrogen, # PHZ1044). The homogenization was carried out using a Tissuelyser II (Qiagen; Cat No. 85300) at 30Hz (brain 3 minutes; kidney and lung 5 minutes; precooling adapter set at 4°C) followed by further homogenization using a Bio-Gen Pro 200 homogenizer (Proscientific Cat No. 01-02200), power level 3) on ice. Tissues were further ultra-sonicated on ice using a Sonics Vibra cell (Misonix Cat No. XL-2000) power set at 3 using 3 pulses of 3 seconds. The tissue lysates were kept on ice for 30 minutes and centrifuged at 14,000 rpm for 30 minutes at 4°C. The supernatant was removed and protein concentration was determined by the BCA method.

**Protein concentration determination in tissue samples.** The BCA Working Reagent (WR) was prepared by mixing 50 parts of Reagent A with 1 part of Reagent B (Thermo Cat No. 23225). Tissue lysates were diluted 1:20 with distilled water, (Invitrogen) 10  $\mu$ L of each standard or sample was pipetted into a Microplate (NUNC Cat no. 442404). Buffer diluted 1:20 with distilled H<sub>2</sub>O was used for background measurements for the tissue samples and distilled water as for the standards. WR (200  $\mu$ L) was added to each well and the plate contents were thoroughly mixed on a plate shaker for 30 seconds followed by incubating at 37°C for 30 minutes. The plate was then cooled to room temperature and the

absorbance at or near 562 nm was measured on a multifunctional microplate reader (BioTek, SYNERGY 4).

**Determination of pS935 LRRK2 levels in tissue samples.** To measure pS935 levels in tissue samples, 50 µl/well of capture antibody was pipetted into a 96-well Microplate (5 µg/ml LRRK2 antibody; Covance (SIG-39840); in coating buffer: 10mM Tris-HCl, 10mM NaCl, pH 8.5) and the plate was incubated overnight at 4°C. Following washing the plate twice with washing buffer (PBST), the plate was blocked with blocking buffer (1% BSA in PBST) and incubated at 37°C for 2 hours after which the buffer was thoroughly removed. Brain, lung and kidney samples were diluted with RIPA buffer (with 1X phosphatase inhibitor) to 5, 0.5, 0.5 mg/ml respectively. Dilution buffer (1% BSA, 1x Phosphatase Inhibitor and 1x Protease Inhibitor in PBST) was added (37.5 µl/well) to the plate and 12.5 µl of diluted brain, lung or kidney samples were added to the plate which was incubated at 4 °C for 2 h. Detection antibody (50 µl/well) was added (1000 -fold diluted pS935-LRRK2 antibody (Epitomics (5099-1) in dilution buffer) was added to the plate which was incubated overnight at 4°C with slow shaking. The plate was washed 3 times with washing buffer and following thorough removal 100 µl/well of HRP labeled anti-rabbit antibody (Perox-AffiniPure Dnk Anti-Rabbit IgG (H+L), Jackson Immuno Research, Cat No 711-035-152; 0.16 µg/ml; secondary antibody) in dilution buffer was added to each well of the plate and incubated at RT for 30 min with slow shaking. The plate was washed 5 times with washing buffer and 200 µl of the ELISA mixed substrates (equal volumes of A solution and B solution (DY999 R&D Systems)) was added to each well and incubated at RT with slow shaking for 15 min following which 50 µl of stop buffer (ELISA stop solution (DY994); R&D Systems) was added to each well followed by gentle mixing. Absorbance was measured on a Spectrum Max M5 plate reader.

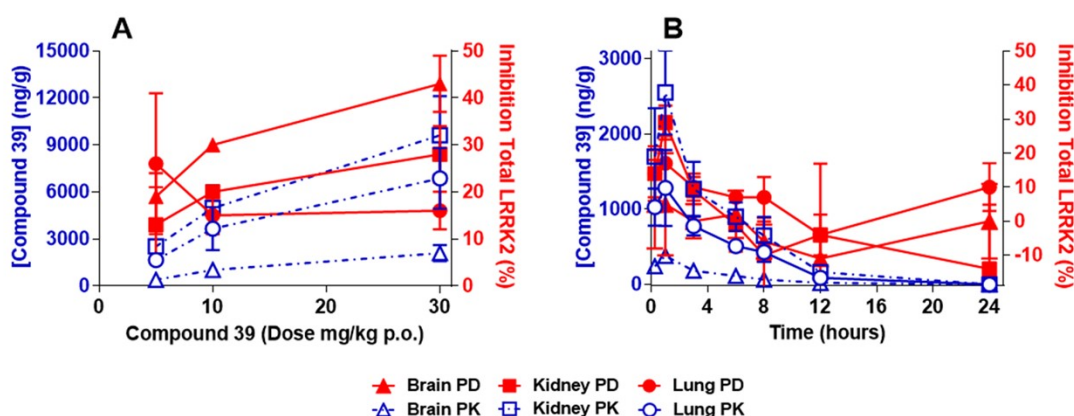

**Supplementary Figure S1.** Dose-response (A) and time course (B) of the pharmacodynamic effects of compounds **39** in rats. Total LRRK2 levels (red solid symbols and lines) were measured by an ELISA assay in rat brain, kidney and lung after oral administration of a single dose of 5 – 30 mg/kg of compound **39** (4 hr pretreatment) (A: Dose-response ) or 3 mg/kg p.o. of Compound **39** (B: Time course)). Compound levels in the tissues at each time point (blue dashed lines and open symbols) correlated with the pharmacodynamic effect. N=3 rats per time point.

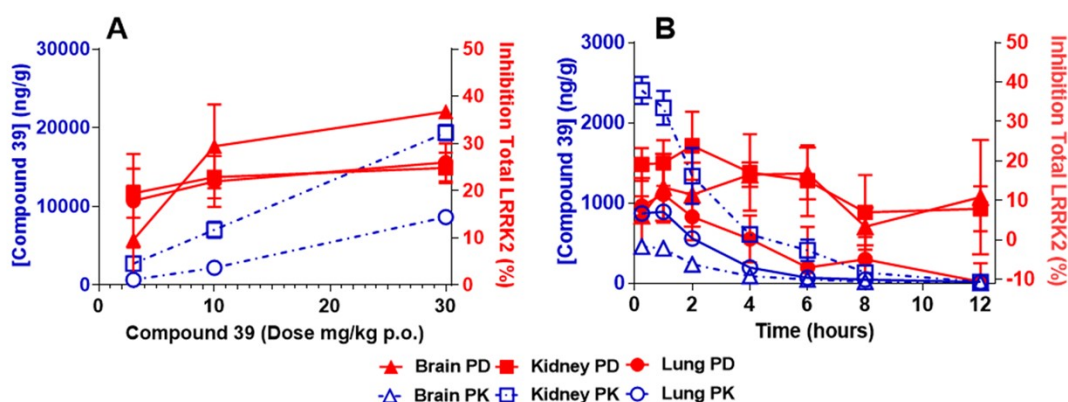

**Supplementary Figure S2.** Dose-response (A) and time course (B) of the pharmacodynamic effects of compounds **39** in mice. Total LRRK2 levels (red solid symbols and lines) were measured by an ELISA assay in mouse brain, kidney and lung after oral administration of a single dose of 3 – 30 mg/kg of compound **39** (4 hr pretreatment) (A: Dose-response ) or 3 mg/kg p.o. of Compound **39** (B: Time course)). Compound levels in the tissues at each time point (blue dashed lines and open symbols) correlated with the pharmacodynamic effect. N= 3 rats per time point for (A) and 2 rats per timepoint for (B).

**Kinase selectivity determination of compounds 39 and 40.** Competition binding assays were conducted as previously described using Kinobeads and Lipid-Kinobeads.<sup>2-3</sup> In brief, one milliliter (1 mL) of cell extract, with a protein concentration of 5 mg/mL, was incubated with the test compound at seven different concentrations ranging from 0.73 nM to 3.0  $\mu$ M (using ¼ dilution increments) and a vehicle control, for 45 minutes at 4 °C. This was followed by a 1-hour incubation with either Kinobeads or Lipid-Kinobeads. The samples were then processed according to the protocol described.<sup>3</sup>

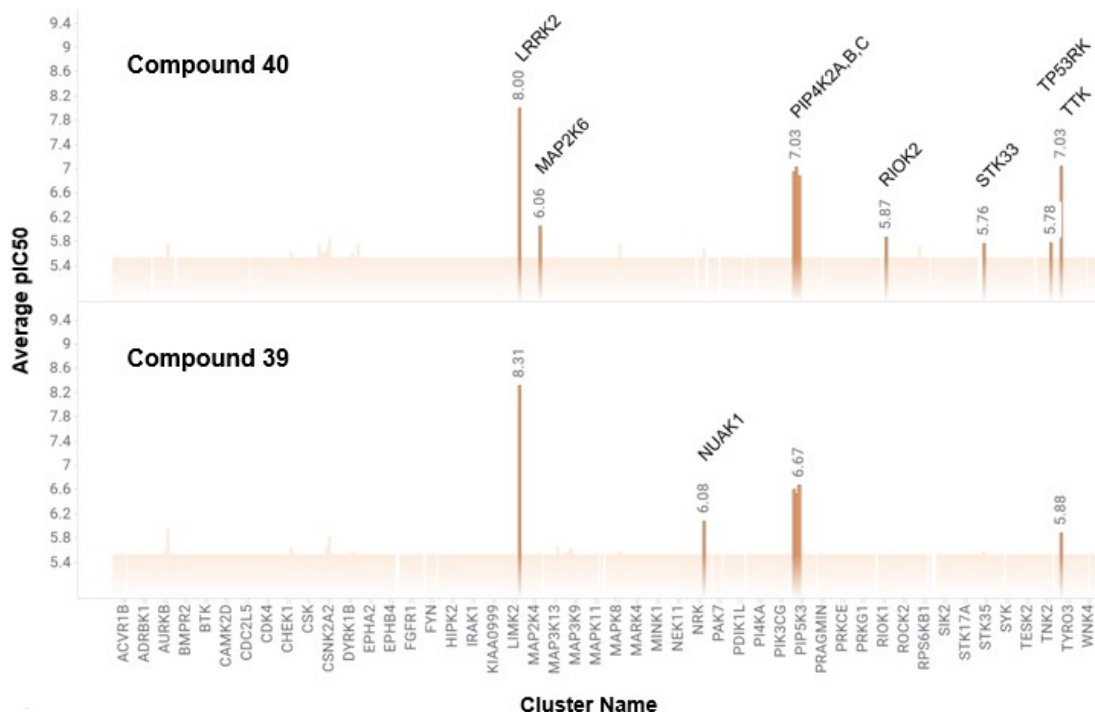

**Supplementary Figure S3.** Kinase selectivity profiles of compounds 39 and 40 determined using Kinobeads and Lipid-Kinobeads.

**Supplementary Table S1.** Individual kinase data of compound **39** determined using Kinobeads and Lipid-Kinobeads (qupm = quantified unique peptides measured).

| Clustername | Focusname                  | Focusgroup       | qupm | IC <sub>50</sub> [uM] | pIC50 |
|-------------|----------------------------|------------------|------|-----------------------|-------|
| AAK1        | AAK1                       | KINASE           | 35   | >3                    | <5.52 |
| AAK1        | AAK1                       | KINASE           | 37   | >3                    | <5.52 |
| ABL1        | ABL                        | KINASE           | 61   | >3                    | <5.52 |
| ABL1        | ABL                        | KINASE           | 60   | >3                    | <5.52 |
| ABL2        | ARG                        | KINASE           | 42   | >3                    | <5.52 |
| ABL2        | ARG                        | KINASE           | 49   | >3                    | <5.52 |
| ACVR1       | ALK2                       | KINASE           | 13   | >3                    | <5.52 |
| ACVR1       | ALK2                       | KINASE           | 16   | >3                    | <5.52 |
| ACVR1B      | Afg3-like protein 1A, ALK4 | PROTEASE, KINASE | 12   | >3                    | <5.52 |
| ACVR1B      | Afg3-like protein 1A, ALK4 | KINASE, PROTEASE | 14   | >3                    | <5.52 |
| ACVR2A      | ACTR2                      | KINASE           | 14   | >3                    | <5.52 |
| ACVR2A      | ACTR2                      | KINASE           | 10   | >3                    | <5.52 |
| ACVR2B      | ACTR2B                     | KINASE           | 16   | >3                    | <5.52 |
| ACVR2B      | ACTR2B                     | KINASE           | 14   | >3                    | <5.52 |
| ACVRL1      | ALK1                       | KINASE           | 5    | >3                    | <5.52 |
| ADCK1       | ADCK1                      | KINASE           | 4    | >3                    | <5.52 |
| ADCK1       | ADCK1                      | KINASE           | 25   | >3                    | <5.52 |
| ADCK1       | ADCK1                      | KINASE           | 6    | >3                    | <5.52 |
| ADCK1       | ADCK1                      | KINASE           | 24   | >3                    | <5.52 |
| ADCK4       | ADCK4                      | KINASE           | 4    | >3                    | <5.52 |
| ADCK5       | ADCK5                      | KINASE           | 5    | >3                    | <5.52 |
| ADCK5       | ADCK5                      | KINASE           | 19   | >3                    | <5.52 |
| ADRBK1      | BARK1                      | KINASE           | 6    | >3                    | <5.52 |
| AKT1        | AKT1                       | KINASE           | 14   | >3                    | <5.52 |
| AKT1        | AKT1                       | KINASE           | 13   | >3                    | <5.52 |
| AKT2        | AKT2                       | KINASE           | 11   | >3                    | <5.52 |
| AKT2        | AKT2                       | KINASE           | 11   | >3                    | <5.52 |
| ALK         | ALK                        | KINASE           | 8    | >3                    | <5.52 |
| ARAF        | ARAF                       | KINASE           | 2    | >3                    | <5.52 |
| ARAF        | ARAF                       | KINASE           | 17   | >3                    | <5.52 |
| ARAF        | ARAF                       | KINASE           | 19   | >3                    | <5.52 |
| ATM         | ATM                        | KINASE           | 51   | >3                    | <5.52 |
| ATM         | ATM                        | KINASE           | 12   | >3                    | <5.52 |
| ATM         | ATM                        | KINASE           | 64   | >3                    | <5.52 |
| ATM         | ATM                        | KINASE           | 52   | >3                    | <5.52 |
| ATR         | ATR                        | KINASE           | 15   | >3                    | <5.52 |
| ATR         | ATR                        | KINASE           | 13   | >3                    | <5.52 |
| ATR         | ATR                        | KINASE           | 6    | >3                    | <5.52 |
| ATR         | ATR                        | KINASE           | 32   | >3                    | <5.52 |

|        |                               |                  |    |     |       |
|--------|-------------------------------|------------------|----|-----|-------|
| AURKA  | AurA                          | KINASE           | 2  | >3  | <5.52 |
| AURKA  | AurA                          | KINASE           | 34 | >3  | <5.52 |
| AURKA  | AurA                          | KINASE           | 34 | >3  | <5.52 |
| AURKB  | AurB                          | KINASE           | 21 | 2.3 | 5.64  |
| AURKB  | AurB                          | KINASE           | 28 | >3  | <5.52 |
| AURKC  | AurC                          | KINASE           | 2  | 1.1 | 5.96  |
| AXL    | AXL                           | KINASE           | 29 | >3  | <5.52 |
| AXL    | AXL                           | KINASE           | 15 | >3  | <5.52 |
| BCR    | BCR, complement component C2a | KINASE, PROTEASE | 59 | >3  | <5.52 |
| BCR    | BCR                           | KINASE           | 41 | >3  | <5.52 |
| BLK    | BLK                           | KINASE           | 39 | >3  | <5.52 |
| BMP2K  | BIKE                          | KINASE           | 46 | >3  | <5.52 |
| BMP2K  | BIKE                          | KINASE           | 48 | >3  | <5.52 |
| BMPR1A | BMPR1A                        | KINASE           | 15 | >3  | <5.52 |
| BMPR1A | BMPR1A                        | KINASE           | 22 | >3  | <5.52 |
| BMPR1B | BMPR1B                        | KINASE           | 13 | >3  | <5.52 |
| BMPR1B | BMPR1B                        | KINASE           | 19 | >3  | <5.52 |
| BMPR2  | BMPR2                         | KINASE           | 18 | >3  | <5.52 |
| BMPR2  | BMPR2                         | KINASE           | 30 | >3  | <5.52 |
| BMX    | BMX                           | KINASE           | 22 | >3  | <5.52 |
| BMX    | BMX                           | KINASE           | 9  | >3  | <5.52 |
| BRAF   | BRAF                          | KINASE           | 19 | >3  | <5.52 |
| BRAF   | BRAF                          | KINASE           | 28 | >3  | <5.52 |
| BRD2   | BRD2                          | KINASE, BROMO    | 12 | >3  | <5.52 |
| BRD2   | BRD2                          | KINASE, BROMO    | 17 | >3  | <5.52 |
| BRD3   | BRD3                          | BROMO, KINASE    | 22 | >3  | <5.52 |
| BRD3   | BRD3                          | KINASE, BROMO    | 21 | >3  | <5.52 |
| BRD4   | BRD4                          | KINASE, BROMO    | 44 | >3  | <5.52 |
| BRD4   | BRD4                          | KINASE, BROMO    | 10 | >3  | <5.52 |
| BRD4   | BRD4                          | KINASE, BROMO    | 31 | >3  | <5.52 |
| BRD4   | BRD4                          | KINASE, BROMO    | 8  | >3  | <5.52 |
| BRSK1  | BRSK1                         | KINASE           | 5  | >3  | <5.52 |
| BRSK1  | BRSK1                         | KINASE           | 8  | >3  | <5.52 |
| BRSK2  | BRSK2                         | KINASE           | 14 | >3  | <5.52 |
| BRSK2  | BRSK2                         | KINASE           | 19 | >3  | <5.52 |
| BTK    | BTK                           | KINASE           | 51 | >3  | <5.52 |
| BTK    | BTK                           | KINASE           | 55 | >3  | <5.52 |
| BUB1   | BUB1                          | KINASE           | 32 | >3  | <5.52 |
| BUB1   | BUB1                          | KINASE           | 44 | >3  | <5.52 |
| BUB1B  | BUBR1                         | KINASE           | 4  | >3  | <5.52 |
| CABC1  | ADCK3                         | KINASE           | 2  | >3  | <5.52 |
| CABC1  | ADCK3                         | KINASE           | 28 | >3  | <5.52 |
| CABC1  | ADCK3                         | KINASE           | 31 | >3  | <5.52 |



|          |         |        |    |    |       |
|----------|---------|--------|----|----|-------|
| CAMK1    | CaMK1a  | KINASE | 4  | >3 | <5.52 |
| CAMK1D   | CaMK1d  | KINASE | 4  | >3 | <5.52 |
| CAMK1D   | CaMK1d  | KINASE | 17 | >3 | <5.52 |
| CAMK2A   | CaMK2a  | KINASE | 2  | >3 | <5.52 |
| CAMK2A   | CaMK2a  | KINASE | 2  | >3 | <5.52 |
| CAMK2B   | CaMK2b  | KINASE | 11 | >3 | <5.52 |
| CAMK2B   | CaMK2b  | KINASE | 8  | >3 | <5.52 |
| CAMK2D   | CaMK2d  | KINASE | 24 | >3 | <5.52 |
| CAMK2D   | CaMK2d  | KINASE | 28 | >3 | <5.52 |
| CAMK2G   | CaMK2g  | KINASE | 22 | >3 | <5.52 |
| CAMK2G   | CaMK2g  | KINASE | 26 | >3 | <5.52 |
| CAMK4    | CaMK4   | KINASE | 5  | >3 | <5.52 |
| CAMK4    | CaMK4   | KINASE | 24 | >3 | <5.52 |
| CAMKK1   | CaMKK1  | KINASE | 20 | >3 | <5.52 |
| CAMKK1   | CaMKK1  | KINASE | 12 | >3 | <5.52 |
| CAMKK2   | CaMKK2  | KINASE | 29 | >3 | <5.52 |
| CAMKK2   | CaMKK2  | KINASE | 40 | >3 | <5.52 |
| CASK     | CASK    | KINASE | 6  | >3 | <5.52 |
| CASK     | CASK    | KINASE | 4  | >3 | <5.52 |
| CDC2     | CDC2    | KINASE | 14 | >3 | <5.52 |
| CDC2     | CDC2    | KINASE | 23 | >3 | <5.52 |
| CDC2L1   | PITSLRE | KINASE | 6  | >3 | <5.52 |
| CDC2L5   | CHED    | KINASE | 4  | >3 | <5.52 |
| CDC2L5   | CHED    | KINASE | 15 | >3 | <5.52 |
| CDC2L6   | CDK11   | KINASE | 3  | >3 | <5.52 |
| CDC42BPA | MRCKa   | KINASE | 34 | >3 | <5.52 |
| CDC42BPA | MRCKa   | KINASE | 21 | >3 | <5.52 |
| CDC42BPB | MRCKb   | KINASE | 37 | >3 | <5.52 |
| CDC42BPB | MRCKb   | KINASE | 41 | >3 | <5.52 |
| CDC42BPG | DMPK2   | KINASE | 16 | >3 | <5.52 |
| CDC42BPG | DMPK2   | KINASE | 8  | >3 | <5.52 |
| CDC7     | CDC7    | KINASE | 7  | >3 | <5.52 |
| CDC7     | CDC7    | KINASE | 13 | >3 | <5.52 |
| CDK10    | CDK10   | KINASE | 11 | >3 | <5.52 |
| CDK10    | CDK10   | KINASE | 14 | >3 | <5.52 |
| CDK2     | CDK2    | KINASE | 2  | >3 | <5.52 |
| CDK2     | CDK2    | KINASE | 21 | >3 | <5.52 |
| CDK2     | CDK2    | KINASE | 22 | >3 | <5.52 |
| CDK4     | CDK4    | KINASE | 16 | >3 | <5.52 |
| CDK5     | CDK5    | KINASE | 26 | >3 | <5.52 |
| CDK5     | CDK5    | KINASE | 27 | >3 | <5.52 |
| CDK6     | CDK6    | KINASE | 4  | >3 | <5.52 |
| CDK6     | CDK6    | KINASE | 27 | >3 | <5.52 |

|         |       |        |     |     |       |
|---------|-------|--------|-----|-----|-------|
| CDK7    | CDK7  | KINASE | 15  | >3  | <5.52 |
| CDK7    | CDK7  | KINASE | 16  | >3  | <5.52 |
| CDK8    | CDK8  | KINASE | 8   | >3  | <5.52 |
| CDK8    | CDK8  | KINASE | 6   | >3  | <5.52 |
| CDK9    | CDK9  | KINASE | 22  | >3  | <5.52 |
| CDK9    | CDK9  | KINASE | 24  | >3  | <5.52 |
| CDKL2   | CDKL2 | KINASE | 4   | >3  | <5.52 |
| CDKL5   | CDKL5 | KINASE | 16  | >3  | <5.52 |
| CDKL5   | CDKL5 | KINASE | 15  | >3  | <5.52 |
| CHEK1   | CHK1  | KINASE | 22  | >3  | <5.52 |
| CHEK1   | CHK1  | KINASE | 38  | >3  | <5.52 |
| CHEK2   | CHK2  | KINASE | 28  | 2   | 5.70  |
| CHEK2   | CHK2  | KINASE | 29  | 2.8 | 5.55  |
| CHUK    | IKKa  | KINASE | 16  | >3  | <5.52 |
| CHUK    | IKKa  | KINASE | 22  | >3  | <5.52 |
| CIT     | CRIK  | KINASE | 82  | >3  | <5.52 |
| CIT     | CRIK  | KINASE | 141 | >3  | <5.52 |
| CLK1    | CLK1  | KINASE | 8   | >3  | <5.52 |
| CLK1    | CLK1  | KINASE | 13  | >3  | <5.52 |
| CLK2    | CLK2  | KINASE | 2   | >3  | <5.52 |
| CLK2    | CLK2  | KINASE | 5   | >3  | <5.52 |
| CRKRS   | CRK7  | KINASE | 16  | >3  | <5.52 |
| CRKRS   | CRK7  | KINASE | 29  | >3  | <5.52 |
| CSF1R   | FMS   | KINASE | 15  | >3  | <5.52 |
| CSK     | CSK   | KINASE | 36  | >3  | <5.52 |
| CSK     | CSK   | KINASE | 40  | >3  | <5.52 |
| CSNK1A1 | CK1a  | KINASE | 17  | >3  | <5.52 |
| CSNK1A1 | CK1a  | KINASE | 24  | >3  | <5.52 |
| CSNK1D  | CK1d  | KINASE | 6   | >3  | <5.52 |
| CSNK1D  | CK1d  | KINASE | 10  | >3  | <5.52 |
| CSNK1E  | CK1e  | KINASE | 12  | >3  | <5.52 |
| CSNK1E  | CK1e  | KINASE | 12  | >3  | <5.52 |
| CSNK1G1 | CK1g1 | KINASE | 2   | >3  | <5.52 |
| CSNK1G1 | CK1g1 | KINASE | 4   | >3  | <5.52 |
| CSNK1G2 | CK1g2 | KINASE | 2   | >3  | <5.52 |
| CSNK1G3 | CK1g3 | KINASE | 2   | >3  | <5.52 |
| CSNK1G3 | CK1g3 | KINASE | 2   | >3  | <5.52 |
| CSNK2A1 | CK2a1 | KINASE | 13  | 1.2 | 5.92  |
| CSNK2A1 | CK2a1 | KINASE | 11  | 1.4 | 5.85  |
| CSNK2A1 | CK2a1 | KINASE | 2   | >3  | <5.52 |
| CSNK2A1 | CK2a1 | KINASE | 6   | >3  | <5.52 |
| CSNK2A1 | CK2a1 | KINASE | 5   | >3  | <5.52 |
| CSNK2A1 | CK2a1 | KINASE | 3   | >3  | <5.52 |

|         |              |        |    |      |       |
|---------|--------------|--------|----|------|-------|
| CSNK2A2 | CK2a2        | KINASE | 22 | 0.6  | 6.22  |
| CSNK2A2 | CK2a2        | KINASE | 24 | 0.98 | 6.01  |
| CSNK2A2 | CK2a2        | KINASE | 24 | >3   | <5.52 |
| CSNK2A2 | CK2a2        | KINASE | 27 | >3   | <5.52 |
| DAPK1   | DAPK1        | KINASE | 35 | >3   | <5.52 |
| DAPK1   | DAPK1        | KINASE | 12 | >3   | <5.52 |
| DAPK2   | DAPK2        | KINASE | 2  | >3   | <5.52 |
| DAPK3   | DAPK3        | KINASE | 4  | >3   | <5.52 |
| DAPK3   | DAPK3        | KINASE | 7  | >3   | <5.52 |
| DDR1    | DDR1         | KINASE | 23 | >3   | <5.52 |
| DDR1    | DDR1         | KINASE | 21 | >3   | <5.52 |
| DDR2    | DDR2         | KINASE | 9  | >3   | <5.52 |
| DDR2    | DDR2         | KINASE | 29 | >3   | <5.52 |
| DSTYK   | SgK496       | KINASE | 18 | >3   | <5.52 |
| DSTYK   | SgK496       | KINASE | 24 | >3   | <5.52 |
| DYRK1A  | DYRK1A       | KINASE | 22 | >3   | <5.52 |
| DYRK1A  | DYRK1A       | KINASE | 23 | >3   | <5.52 |
| DYRK1B  | DYRK1B       | KINASE | 3  | >3   | <5.52 |
| DYRK1B  | DYRK1B       | KINASE | 7  | >3   | <5.52 |
| DYRK2   | DYRK2        | KINASE | 6  | 2.5  | 5.60  |
| DYRK2   | DYRK2        | KINASE | 14 | >3   | <5.52 |
| EGFR    | EGFR         | KINASE | 67 | >3   | <5.52 |
| EGFR    | EGFR         | KINASE | 56 | >3   | <5.52 |
| EIF2AK1 | HRI          | KINASE | 18 | >3   | <5.52 |
| EIF2AK1 | HRI          | KINASE | 20 | >3   | <5.52 |
| EIF2AK2 | PKR          | KINASE | 9  | >3   | <5.52 |
| EIF2AK2 | PKR          | KINASE | 15 | >3   | <5.52 |
| EIF2AK3 | PEK          | KINASE | 13 | >3   | <5.52 |
| EIF2AK3 | PEK          | KINASE | 21 | >3   | <5.52 |
| EIF2AK4 | GCN2         | KINASE | 72 | >3   | <5.52 |
| EIF2AK4 | GCN2         | KINASE | 85 | >3   | <5.52 |
| EPHA1   | EphA1        | KINASE | 21 | >3   | <5.52 |
| EPHA2   | EphA2        | KINASE | 37 | >3   | <5.52 |
| EPHA2   | EphA2        | KINASE | 57 | >3   | <5.52 |
| EPHA3   | EphA3, EphA6 | KINASE | 37 | >3   | <5.52 |
| EPHA3   | EphA3, EphA6 | KINASE | 35 | >3   | <5.52 |
| EPHA4   | EphA4        | KINASE | 33 | >3   | <5.52 |
| EPHA4   | EphA4        | KINASE | 11 | >3   | <5.52 |
| EPHA5   | EphA5        | KINASE | 10 | >3   | <5.52 |
| EPHA5   | EphA5        | KINASE | 6  | >3   | <5.52 |
| EPHA7   | EphA7        | KINASE | 29 | >3   | <5.52 |
| EPHA7   | EphA7        | KINASE | 20 | >3   | <5.52 |
| EPHB1   | EphB1        | KINASE | 20 | >3   | <5.52 |

|       |            |        |    |    |       |
|-------|------------|--------|----|----|-------|
| EPHB2 | EphB2      | KINASE | 31 | >3 | <5.52 |
| EPHB2 | EphB2      | KINASE | 34 | >3 | <5.52 |
| EPHB3 | EphB3      | KINASE | 28 | >3 | <5.52 |
| EPHB3 | EphB3      | KINASE | 30 | >3 | <5.52 |
| EPHB4 | EphB4      | KINASE | 44 | >3 | <5.52 |
| EPHB4 | EphB4      | KINASE | 49 | >3 | <5.52 |
| EPHB6 | EphB6      | KINASE | 28 | >3 | <5.52 |
| EPHB6 | EphB6      | KINASE | 26 | >3 | <5.52 |
| ERBB4 | HER4/ErbB4 | KINASE | 12 | >3 | <5.52 |
| ERN1  | IRE1       | KINASE | 24 | >3 | <5.52 |
| ERN1  | IRE1       | KINASE | 23 | >3 | <5.52 |
| FER   | FER        | KINASE | 55 | >3 | <5.52 |
| FER   | FER        | KINASE | 65 | >3 | <5.52 |
| FES   | FES        | KINASE | 37 | >3 | <5.52 |
| FGFR1 | FGFR1      | KINASE | 15 | >3 | <5.52 |
| FGFR1 | FGFR1      | KINASE | 23 | >3 | <5.52 |
| FGFR2 | FGFR2      | KINASE | 15 | >3 | <5.52 |
| FGFR2 | FGFR2      | KINASE | 10 | >3 | <5.52 |
| FGFR3 | FGFR3      | KINASE | 8  | >3 | <5.52 |
| FGFR3 | FGFR3      | KINASE | 5  | >3 | <5.52 |
| FGFR4 | FGFR4      | KINASE | 4  | >3 | <5.52 |
| FGFR4 | FGFR4      | KINASE | 4  | >3 | <5.52 |
| FGR   | FGR        | KINASE | 14 | >3 | <5.52 |
| FGR   | FGR        | KINASE | 15 | >3 | <5.52 |
| FLT4  | FLT4       | KINASE | 32 | >3 | <5.52 |
| FRK   | FRK        | KINASE | 16 | >3 | <5.52 |
| FRK   | FRK        | KINASE | 3  | >3 | <5.52 |
| FYN   | FYN        | KINASE | 30 | >3 | <5.52 |
| FYN   | FYN        | KINASE | 33 | >3 | <5.52 |
| GAK   | GAK        | KINASE | 76 | >3 | <5.52 |
| GAK   | GAK        | KINASE | 83 | >3 | <5.52 |
| GSG2  | Haspin     | KINASE | 2  | >3 | <5.52 |
| GSG2  | Haspin     | KINASE | 2  | >3 | <5.52 |
| GSK3A | GSK3A      | KINASE | 3  | >3 | <5.52 |
| GSK3A | GSK3A      | KINASE | 15 | >3 | <5.52 |
| GSK3A | GSK3A      | KINASE | 2  | >3 | <5.52 |
| GSK3A | GSK3A      | KINASE | 17 | >3 | <5.52 |
| GSK3B | GSK3B      | KINASE | 5  | >3 | <5.52 |
| GSK3B | GSK3B      | KINASE | 22 | >3 | <5.52 |
| GSK3B | GSK3B      | KINASE | 8  | >3 | <5.52 |
| GSK3B | GSK3B      | KINASE | 24 | >3 | <5.52 |
| HCK   | HCK        | KINASE | 24 | >3 | <5.52 |
| HIPK1 | HIPK1      | KINASE | 11 | >3 | <5.52 |

|          |       |        |    |    |       |
|----------|-------|--------|----|----|-------|
| HIPK1    | HIPK1 | KINASE | 14 | >3 | <5.52 |
| HIPK2    | HIPK2 | KINASE | 9  | >3 | <5.52 |
| HIPK2    | HIPK2 | KINASE | 11 | >3 | <5.52 |
| HIPK3    | HIPK3 | KINASE | 6  | >3 | <5.52 |
| HIPK3    | HIPK3 | KINASE | 9  | >3 | <5.52 |
| ICK      | ICK   | KINASE | 8  | >3 | <5.52 |
| ICK      | ICK   | KINASE | 14 | >3 | <5.52 |
| IGF1R    | IGF1R | KINASE | 40 | >3 | <5.52 |
| IGF1R    | IGF1R | KINASE | 39 | >3 | <5.52 |
| IKBKB    | IKKb  | KINASE | 17 | >3 | <5.52 |
| IKBKB    | IKKb  | KINASE | 19 | >3 | <5.52 |
| IKBKE    | IKKe  | KINASE | 26 | >3 | <5.52 |
| IKBKE    | IKKe  | KINASE | 46 | >3 | <5.52 |
| ILK      | ILK   | KINASE | 13 | >3 | <5.52 |
| ILK      | ILK   | KINASE | 17 | >3 | <5.52 |
| INSR     | INSR  | KINASE | 51 | >3 | <5.52 |
| INSR     | INSR  | KINASE | 42 | >3 | <5.52 |
| IRAK1    | IRAK1 | KINASE | 19 | >3 | <5.52 |
| IRAK1    | IRAK1 | KINASE | 21 | >3 | <5.52 |
| IRAK3    | IRAK3 | KINASE | 13 | >3 | <5.52 |
| IRAK4    | IRAK4 | KINASE | 35 | >3 | <5.52 |
| IRAK4    | IRAK4 | KINASE | 39 | >3 | <5.52 |
| ITK      | ITK   | KINASE | 23 | >3 | <5.52 |
| ITK      | ITK   | KINASE | 45 | >3 | <5.52 |
| JAK1     | JAK1  | KINASE | 75 | >3 | <5.52 |
| JAK1     | JAK1  | KINASE | 94 | >3 | <5.52 |
| JAK2     | JAK2  | KINASE | 30 | >3 | <5.52 |
| JAK2     | JAK2  | KINASE | 55 | >3 | <5.52 |
| JAK3     | JAK3  | KINASE | 13 | >3 | <5.52 |
| JAK3     | JAK3  | KINASE | 55 | >3 | <5.52 |
| KDR      | KDR   | KINASE | 20 | >3 | <5.52 |
| KIAA0999 | QSK   | KINASE | 31 | >3 | <5.52 |
| KIAA0999 | QSK   | KINASE | 47 | >3 | <5.52 |
| KIAA1804 | MLK4  | KINASE | 25 | >3 | <5.52 |
| KIAA1804 | MLK4  | KINASE | 18 | >3 | <5.52 |
| KIT      | KIT   | KINASE | 17 | >3 | <5.52 |
| KIT      | KIT   | KINASE | 23 | >3 | <5.52 |
| KSR1     | KSR1  | KINASE | 11 | >3 | <5.52 |
| KSR1     | KSR1  | KINASE | 4  | >3 | <5.52 |
| LATS1    | LATS1 | KINASE | 41 | >3 | <5.52 |
| LATS1    | LATS1 | KINASE | 41 | >3 | <5.52 |
| LATS2    | LATS2 | KINASE | 7  | >3 | <5.52 |
| LATS2    | LATS2 | KINASE | 7  | >3 | <5.52 |

|              |        |        |    |        |       |
|--------------|--------|--------|----|--------|-------|
| LCK          | LCK    | KINASE | 11 | >3     | <5.52 |
| LCK          | LCK    | KINASE | 32 | >3     | <5.52 |
| LIMK1        | LIMK1  | KINASE | 26 | >3     | <5.52 |
| LIMK1        | LIMK1  | KINASE | 39 | >3     | <5.52 |
| LIMK2        | LIMK2  | KINASE | 23 | >3     | <5.52 |
| LIMK2        | LIMK2  | KINASE | 24 | >3     | <5.52 |
| LOC100128443 | MAST4  | KINASE | 14 | >3     | <5.52 |
| LOC100128443 | MAST4  | KINASE | 5  | >3     | <5.52 |
| LRRK2        | LRRK2  | KINASE | 7  | 0.0049 | 8.31  |
| LTK          | LTK    | KINASE | 3  | >3     | <5.52 |
| LYN          | LYN    | KINASE | 37 | >3     | <5.52 |
| LYN          | LYN    | KINASE | 50 | >3     | <5.52 |
| MAP2K1       | MAP2K1 | KINASE | 15 | >3     | <5.52 |
| MAP2K1       | MAP2K1 | KINASE | 13 | >3     | <5.52 |
| MAP2K2       | MAP2K2 | KINASE | 15 | >3     | <5.52 |
| MAP2K2       | MAP2K2 | KINASE | 22 | >3     | <5.52 |
| MAP2K3       | MAP2K3 | KINASE | 12 | >3     | <5.52 |
| MAP2K3       | MAP2K3 | KINASE | 15 | >3     | <5.52 |
| MAP2K4       | MAP2K4 | KINASE | 22 | >3     | <5.52 |
| MAP2K4       | MAP2K4 | KINASE | 17 | >3     | <5.52 |
| MAP2K5       | MAP2K5 | KINASE | 21 | >3     | <5.52 |
| MAP2K5       | MAP2K5 | KINASE | 24 | >3     | <5.52 |
| MAP2K6       | MAP2K6 | KINASE | 17 | >3     | <5.52 |
| MAP2K6       | MAP2K6 | KINASE | 23 | >3     | <5.52 |
| MAP3K1       | MAP3K1 | KINASE | 36 | >3     | <5.52 |
| MAP3K1       | MAP3K1 | KINASE | 47 | >3     | <5.52 |
| MAP3K10      | MLK2   | KINASE | 3  | >3     | <5.52 |
| MAP3K11      | MLK3   | KINASE | 23 | >3     | <5.52 |
| MAP3K11      | MLK3   | KINASE | 31 | >3     | <5.52 |
| MAP3K12      | DLK    | KINASE | 20 | >3     | <5.52 |
| MAP3K13      | LZK    | KINASE | 4  | >3     | <5.52 |
| MAP3K13      | LZK    | KINASE | 5  | >3     | <5.52 |
| MAP3K15      | MAP3K7 | KINASE | 14 | 1.6    | 5.80  |
| MAP3K15      | MAP3K7 | KINASE | 2  | >3     | <5.52 |
| MAP3K2       | MAP3K2 | KINASE | 18 | >3     | <5.52 |
| MAP3K2       | MAP3K2 | KINASE | 25 | >3     | <5.52 |
| MAP3K3       | MAP3K3 | KINASE | 22 | >3     | <5.52 |
| MAP3K3       | MAP3K3 | KINASE | 25 | >3     | <5.52 |
| MAP3K4       | MAP3K4 | KINASE | 70 | >3     | <5.52 |
| MAP3K4       | MAP3K4 | KINASE | 66 | >3     | <5.52 |
| MAP3K5       | MAP3K5 | KINASE | 50 | 2.4    | 5.62  |
| MAP3K5       | MAP3K5 | KINASE | 50 | >3     | <5.52 |
| MAP3K6       | MAP3K6 | KINASE | 28 | 1.8    | 5.74  |

|          |          |        |    |     |       |
|----------|----------|--------|----|-----|-------|
| MAP3K6   | MAP3K6   | KINASE | 17 | >3  | <5.52 |
| MAP3K7   | TAK1     | KINASE | 22 | >3  | <5.52 |
| MAP3K7   | TAK1     | KINASE | 25 | >3  | <5.52 |
| MAP3K9   | MLK1     | KINASE | 5  | >3  | <5.52 |
| MAP3K9   | MLK1     | KINASE | 18 | >3  | <5.52 |
| MAP4K1   | HPK1     | KINASE | 5  | >3  | <5.52 |
| MAP4K1   | HPK1     | KINASE | 30 | >3  | <5.52 |
| MAP4K2   | GCK      | KINASE | 23 | >3  | <5.52 |
| MAP4K2   | GCK      | KINASE | 31 | >3  | <5.52 |
| MAP4K3   | KHS2     | KINASE | 18 | >3  | <5.52 |
| MAP4K3   | KHS2     | KINASE | 20 | >3  | <5.52 |
| MAP4K4   | ZC1/HGK  | KINASE | 36 | >3  | <5.52 |
| MAP4K4   | ZC1/HGK  | KINASE | 68 | >3  | <5.52 |
| MAP4K5   | KHS1     | KINASE | 30 | >3  | <5.52 |
| MAP4K5   | KHS1     | KINASE | 31 | >3  | <5.52 |
| MAPK1    | Erk2     | KINASE | 3  | >3  | <5.52 |
| MAPK1    | Erk2     | KINASE | 21 | >3  | <5.52 |
| MAPK1    | Erk2     | KINASE | 5  | >3  | <5.52 |
| MAPK1    | Erk2     | KINASE | 25 | >3  | <5.52 |
| MAPK10   | JNK3     | KINASE | 3  | >3  | <5.52 |
| MAPK10   | JNK3     | KINASE | 10 | >3  | <5.52 |
| MAPK11   | p38b     | KINASE | 7  | >3  | <5.52 |
| MAPK11   | p38b     | KINASE | 9  | >3  | <5.52 |
| MAPK14   | p38a     | KINASE | 25 | >3  | <5.52 |
| MAPK14   | p38a     | KINASE | 27 | >3  | <5.52 |
| MAPK3    | Erk1     | KINASE | 14 | >3  | <5.52 |
| MAPK3    | Erk1     | KINASE | 18 | >3  | <5.52 |
| MAPK4    | Erk4     | KINASE | 3  | >3  | <5.52 |
| MAPK6    | Erk3     | KINASE | 9  | >3  | <5.52 |
| MAPK6    | Erk3     | KINASE | 10 | >3  | <5.52 |
| MAPK7    | Erk5     | KINASE | 22 | >3  | <5.52 |
| MAPK7    | Erk5     | KINASE | 23 | >3  | <5.52 |
| MAPK8    | JNK1     | KINASE | 17 | >3  | <5.52 |
| MAPK8    | JNK1     | KINASE | 20 | >3  | <5.52 |
| MAPK9    | JNK2     | KINASE | 4  | 1.8 | 5.74  |
| MAPK9    | JNK2     | KINASE | 23 | >3  | <5.52 |
| MAPK9    | JNK2     | KINASE | 3  | >3  | <5.52 |
| MAPK9    | JNK2     | KINASE | 24 | >3  | <5.52 |
| MAPKAPK2 | MAPKAPK2 | KINASE | 7  | >3  | <5.52 |
| MAPKAPK3 | MAPKAPK3 | KINASE | 8  | >3  | <5.52 |
| MAPKAPK3 | MAPKAPK3 | KINASE | 8  | >3  | <5.52 |
| MAPKAPK5 | MAPKAPK5 | KINASE | 6  | >3  | <5.52 |
| MAPKAPK5 | MAPKAPK5 | KINASE | 9  | >3  | <5.52 |

|       |          |        |     |    |       |
|-------|----------|--------|-----|----|-------|
| MARK1 | MARK1    | KINASE | 23  | >3 | <5.52 |
| MARK1 | MARK1    | KINASE | 26  | >3 | <5.52 |
| MARK2 | MARK2    | KINASE | 41  | >3 | <5.52 |
| MARK2 | MARK2    | KINASE | 58  | >3 | <5.52 |
| MARK3 | MARK3    | KINASE | 31  | >3 | <5.52 |
| MARK3 | MARK3    | KINASE | 42  | >3 | <5.52 |
| MARK4 | MARK4    | KINASE | 19  | >3 | <5.52 |
| MARK4 | MARK4    | KINASE | 31  | >3 | <5.52 |
| MAST1 | MAST1    | KINASE | 8   | >3 | <5.52 |
| MAST2 | MAST2    | KINASE | 12  | >3 | <5.52 |
| MAST2 | MAST2    | KINASE | 19  | >3 | <5.52 |
| MAST3 | MAST3    | KINASE | 22  | >3 | <5.52 |
| MAST3 | MAST3    | KINASE | 35  | >3 | <5.52 |
| MASTL | MASTL    | KINASE | 13  | >3 | <5.52 |
| MASTL | MASTL    | KINASE | 21  | >3 | <5.52 |
| MELK  | MELK     | KINASE | 31  | >3 | <5.52 |
| MELK  | MELK     | KINASE | 41  | >3 | <5.52 |
| MERTK | MER      | KINASE | 20  | >3 | <5.52 |
| MERTK | MER      | KINASE | 25  | >3 | <5.52 |
| MET   | MET      | KINASE | 42  | >3 | <5.52 |
| MINK1 | ZC3/MINK | KINASE | 30  | >3 | <5.52 |
| MINK1 | ZC3/MINK | KINASE | 44  | >3 | <5.52 |
| MKNK1 | MNK1     | KINASE | 8   | >3 | <5.52 |
| MKNK1 | MNK1     | KINASE | 6   | >3 | <5.52 |
| MKNK2 | MNK2     | KINASE | 8   | >3 | <5.52 |
| MKNK2 | MNK2     | KINASE | 9   | >3 | <5.52 |
| MST1R | RON      | KINASE | 13  | >3 | <5.52 |
| mTOR  | FRAP     | KINASE | 111 | >3 | <5.52 |
| mTOR  | FRAP     | KINASE | 51  | >3 | <5.52 |
| mTOR  | FRAP     | KINASE | 139 | >3 | <5.52 |
| mTOR  | FRAP     | KINASE | 50  | >3 | <5.52 |
| MYLK  | smMLCK   | KINASE | 37  | >3 | <5.52 |
| MYLK  | smMLCK   | KINASE | 13  | >3 | <5.52 |
| MYLK3 | CaMLCK   | KINASE | 14  | >3 | <5.52 |
| MYLK3 | CaMLCK   | KINASE | 2   | >3 | <5.52 |
| NEK1  | NEK1     | KINASE | 46  | >3 | <5.52 |
| NEK1  | NEK1     | KINASE | 46  | >3 | <5.52 |
| NEK11 | NEK11    | KINASE | 3   | >3 | <5.52 |
| NEK2  | NEK2     | KINASE | 24  | >3 | <5.52 |
| NEK2  | NEK2     | KINASE | 30  | >3 | <5.52 |
| NEK3  | NEK3     | KINASE | 8   | >3 | <5.52 |
| NEK3  | NEK3     | KINASE | 18  | >3 | <5.52 |
| NEK6  | NEK6     | KINASE | 10  | >3 | <5.52 |



|        |          |        |    |      |       |
|--------|----------|--------|----|------|-------|
| NEK6   | NEK6     | KINASE | 16 | >3   | <5.52 |
| NEK7   | NEK7     | KINASE | 11 | >3   | <5.52 |
| NEK7   | NEK7     | KINASE | 12 | >3   | <5.52 |
| NEK9   | NEK9     | KINASE | 56 | >3   | <5.52 |
| NEK9   | NEK9     | KINASE | 65 | >3   | <5.52 |
| NLK    | NLK      | KINASE | 13 | >3   | <5.52 |
| NLK    | NLK      | KINASE | 15 | >3   | <5.52 |
| NPR2   | ANPb     | KINASE | 2  | >3   | <5.52 |
| NRK    | ZC4/NRK  | KINASE | 8  | >3   | <5.52 |
| NTRK1  | TRKA     | KINASE | 18 | >3   | <5.52 |
| NTRK1  | TRKA     | KINASE | 9  | >3   | <5.52 |
| NUAK1  | NuaK1    | KINASE | 10 | 0.8  | 6.10  |
| NUAK1  | NuaK1    | KINASE | 9  | 0.85 | 6.07  |
| NUAK2  | NuaK2    | KINASE | 5  | >3   | <5.52 |
| OXSRI  | OSR1     | KINASE | 17 | >3   | <5.52 |
| OXSRI  | OSR1     | KINASE | 18 | >3   | <5.52 |
| PAK4   | PAK4     | KINASE | 32 | >3   | <5.52 |
| PAK4   | PAK4     | KINASE | 33 | >3   | <5.52 |
| PAK6   | PAK6     | KINASE | 5  | >3   | <5.52 |
| PAK6   | PAK6     | KINASE | 6  | >3   | <5.52 |
| PAK7   | PAK5     | KINASE | 12 | >3   | <5.52 |
| PBK    | PBK      | KINASE | 2  | >3   | <5.52 |
| PBK    | PBK      | KINASE | 2  | >3   | <5.52 |
| PCTK1  | PCTAIRE1 | KINASE | 23 | >3   | <5.52 |
| PCTK1  | PCTAIRE1 | KINASE | 19 | >3   | <5.52 |
| PCTK2  | PCTAIRE2 | KINASE | 15 | >3   | <5.52 |
| PCTK2  | PCTAIRE2 | KINASE | 18 | >3   | <5.52 |
| PCTK3  | PCTAIRE3 | KINASE | 13 | >3   | <5.52 |
| PCTK3  | PCTAIRE3 | KINASE | 16 | >3   | <5.52 |
| PDGFRA | PDGFRa   | KINASE | 10 | >3   | <5.52 |
| PDGFRA | PDGFRa   | KINASE | 34 | >3   | <5.52 |
| PDGFRB | PDGFRb   | KINASE | 19 | >3   | <5.52 |
| PDGFRB | PDGFRb   | KINASE | 23 | >3   | <5.52 |
| PDIK1L | CLIK1L   | KINASE | 9  | >3   | <5.52 |
| PDIK1L | CLIK1L   | KINASE | 6  | >3   | <5.52 |
| PDK1   | PDHK1    | KINASE | 2  | >3   | <5.52 |
| PDPK1  | PDK1     | KINASE | 23 | >3   | <5.52 |
| PDPK1  | PDK1     | KINASE | 25 | >3   | <5.52 |
| PFTK1  | PFTAIRE1 | KINASE | 7  | >3   | <5.52 |
| PFTK1  | PFTAIRE1 | KINASE | 14 | >3   | <5.52 |
| PHKG2  | PHKg2    | KINASE | 14 | >3   | <5.52 |
| PHKG2  | PHKg2    | KINASE | 20 | >3   | <5.52 |
| PI4K2A | PIK4C2A  | KINASE | 5  | >3   | <5.52 |

|         |                                      |                  |    |    |       |
|---------|--------------------------------------|------------------|----|----|-------|
| PI4K2B  | PIK4C2B                              | KINASE           | 4  | >3 | <5.52 |
| PI4K2B  | PIK4C2B                              | KINASE           | 7  | >3 | <5.52 |
| PI4K2B  | PIK4C2B                              | KINASE           | 7  | >3 | <5.52 |
| PI4KA   | PIK4Ca                               | KINASE           | 47 | >3 | <5.52 |
| PI4KA   | PIK4Ca                               | KINASE           | 4  | >3 | <5.52 |
| PI4KA   | PIK4Ca                               | KINASE           | 12 | >3 | <5.52 |
| PI4KA   | PIK4Ca                               | KINASE           | 51 | >3 | <5.52 |
| PI4KA   | PIK4Ca                               | KINASE           | 4  | >3 | <5.52 |
| PI4KA   | PIK4Ca                               | KINASE           | 10 | >3 | <5.52 |
| PI4KB   | PIK4Cb                               | KINASE           | 23 | >3 | <5.52 |
| PI4KB   | PIK4Cb                               | KINASE           | 22 | >3 | <5.52 |
| PIK3C2A | PIK3C2a                              | KINASE           | 30 | >3 | <5.52 |
| PIK3C2A | PIK3C2a                              | KINASE           | 40 | >3 | <5.52 |
| PIK3C2A | PIK3C2a                              | KINASE           | 2  | >3 | <5.52 |
| PIK3C2B | PIK3C2b                              | KINASE           | 68 | >3 | <5.52 |
| PIK3C2B | complement component C2a,<br>PIK3C2b | PROTEASE, KINASE | 15 | >3 | <5.52 |
| PIK3C2B | PIK3C2b                              | KINASE           | 71 | >3 | <5.52 |
| PIK3C2B | PIK3C2b                              | KINASE           | 6  | >3 | <5.52 |
| PIK3C3  | PIK3C3                               | KINASE           | 50 | >3 | <5.52 |
| PIK3C3  | complement component C2a, PIK3C3     | PROTEASE, KINASE | 21 | >3 | <5.52 |
| PIK3C3  | PIK3C3                               | KINASE           | 55 | >3 | <5.52 |
| PIK3C3  | PIK3C3                               | KINASE           | 19 | >3 | <5.52 |
| PIK3CA  | PIK3Ca                               | KINASE           | 67 | >3 | <5.52 |
| PIK3CA  | PIK3Ca                               | KINASE           | 67 | >3 | <5.52 |
| PIK3CA  | PIK3Ca                               | KINASE           | 2  | >3 | <5.52 |
| PIK3CB  | PIK3Cb                               | KINASE           | 48 | >3 | <5.52 |
| PIK3CB  | PIK3Cb                               | KINASE           | 63 | >3 | <5.52 |
| PIK3CB  | PIK3Cb                               | KINASE           | 12 | >3 | <5.52 |
| PIK3CD  | PIK3Cd                               | KINASE           | 55 | >3 | <5.52 |
| PIK3CD  | PIK3Cd                               | KINASE           | 65 | >3 | <5.52 |
| PIK3CD  | PIK3Cd                               | KINASE           | 4  | >3 | <5.52 |
| PIK3CG  | PIK3Cg                               | KINASE           | 53 | >3 | <5.52 |
| PIK3CG  | PIK3Cg                               | KINASE           | 57 | >3 | <5.52 |
| PIK3CG  | PIK3Cg                               | KINASE           | 2  | >3 | <5.52 |
| PIK3R4  | PIK3R4                               | KINASE           | 65 | >3 | <5.52 |
| PIK3R4  | PIK3R4                               | KINASE           | 16 | >3 | <5.52 |
| PIK3R4  | PIK3R4                               | KINASE           | 64 | >3 | <5.52 |
| PIK3R4  | PIK3R4                               | KINASE           | 23 | >3 | <5.52 |
| PIM1    | PIM1                                 | KINASE           | 2  | >3 | <5.52 |
| PIM1    | PIM1                                 | KINASE           | 14 | >3 | <5.52 |
| PIM1    | PIM1                                 | KINASE           | 7  | >3 | <5.52 |
| PIM1    | PIM1                                 | KINASE           | 10 | >3 | <5.52 |

|         |                                |                  |    |      |       |
|---------|--------------------------------|------------------|----|------|-------|
| PIM2    | PIM2                           | KINASE           | 9  | >3   | <5.52 |
| PIM2    | PIM2                           | KINASE           | 12 | >3   | <5.52 |
| PIM3    | PIM3                           | KINASE           | 6  | >3   | <5.52 |
| PIM3    | PIM3                           | KINASE           | 6  | >3   | <5.52 |
| PIP4K2A | PIP5K2A                        | KINASE           | 11 | 0.23 | 6.64  |
| PIP4K2A | PIP5K2A                        | KINASE           | 14 | 0.27 | 6.57  |
| PIP4K2B | PIP5K2B                        | KINASE           | 11 | 0.28 | 6.55  |
| PIP4K2B | PIP5K2B                        | KINASE           | 17 | 0.32 | 6.49  |
| PIP4K2C | PIP5K2C                        | KINASE           | 18 | 0.2  | 6.70  |
| PIP4K2C | PIP5K2C                        | KINASE           | 25 | 0.23 | 6.64  |
| PIP5K3  | PIP5K3                         | KINASE           | 40 | >3   | <5.52 |
| PIP5K3  | PIP5K3                         | KINASE           | 76 | >3   | <5.52 |
| PIP5K3  | PIP5K3                         | KINASE           | 52 | >3   | <5.52 |
| PIP5K3  | PIP5K3                         | KINASE           | 96 | >3   | <5.52 |
| PKMYT1  | MYT1                           | KINASE           | 17 | >3   | <5.52 |
| PKMYT1  | MYT1                           | KINASE           | 21 | >3   | <5.52 |
| PKN1    | complement component C2a, PKN1 | PROTEASE, KINASE | 15 | >3   | <5.52 |
| PKN1    | PKN1                           | KINASE           | 27 | >3   | <5.52 |
| PKN2    | complement component C2a, PKN2 | PROTEASE, KINASE | 30 | >3   | <5.52 |
| PKN2    | PKN2                           | KINASE           | 34 | >3   | <5.52 |
| PKN3    | complement component C2a, PKN3 | PROTEASE, KINASE | 19 | >3   | <5.52 |
| PKN3    | PKN3                           | KINASE           | 7  | >3   | <5.52 |
| PLK1    | PLK1                           | KINASE           | 20 | >3   | <5.52 |
| PLK1    | PLK1                           | KINASE           | 23 | >3   | <5.52 |
| PLK4    | PLK4                           | KINASE           | 23 | >3   | <5.52 |
| PLK4    | PLK4                           | KINASE           | 40 | >3   | <5.52 |
| PRAGMIN | Sgk223                         | KINASE           | 13 | >3   | <5.52 |
| PRKAA1  | AMPKa1                         | KINASE           | 36 | >3   | <5.52 |
| PRKAA1  | AMPKa1                         | KINASE           | 43 | >3   | <5.52 |
| PRKAA2  | AMPKa2                         | KINASE           | 17 | >3   | <5.52 |
| PRKAA2  | AMPKa2                         | KINASE           | 15 | >3   | <5.52 |
| PRKACA  | PKACa                          | KINASE           | 5  | >3   | <5.52 |
| PRKACA  | PKACa                          | KINASE           | 4  | >3   | <5.52 |
| PRKACB  | PKACb, Sgk494                  | KINASE           | 3  | >3   | <5.52 |
| PRKACB  | PKACb, Sgk494                  | KINASE           | 4  | >3   | <5.52 |
| PRKCA   | complement component C2a, PKCa | PROTEASE, KINASE | 24 | >3   | <5.52 |
| PRKCA   | PKCa                           | KINASE           | 26 | >3   | <5.52 |
| PRKCB   | complement component C2a, PKCb | PROTEASE, KINASE | 24 | >3   | <5.52 |
| PRKCB   | PKCb                           | KINASE           | 18 | >3   | <5.52 |
| PRKCD   | complement component C2a, PKCd | PROTEASE, KINASE | 28 | >3   | <5.52 |
| PRKCD   | PKCd                           | KINASE           | 28 | >3   | <5.52 |
| PRKCE   | complement component C2a, PKCe | PROTEASE, KINASE | 2  | >3   | <5.52 |
| PRKCE   | PKCe                           | KINASE           | 3  | >3   | <5.52 |

|        |        |        |     |    |       |
|--------|--------|--------|-----|----|-------|
| PRKCI  | PKCi   | KINASE | 4   | >3 | <5.52 |
| PRKCI  | PKCi   | KINASE | 16  | >3 | <5.52 |
| PRKCQ  | PKCt   | KINASE | 35  | >3 | <5.52 |
| PRKCQ  | PKCt   | KINASE | 39  | >3 | <5.52 |
| PRKCZ  | PKCz   | KINASE | 4   | >3 | <5.52 |
| PRKCZ  | PKCz   | KINASE | 6   | >3 | <5.52 |
| PRKD1  | PKD1   | KINASE | 18  | >3 | <5.52 |
| PRKD2  | PKD2   | KINASE | 27  | >3 | <5.52 |
| PRKD2  | PKD2   | KINASE | 35  | >3 | <5.52 |
| PRKD3  | PKD3   | KINASE | 17  | >3 | <5.52 |
| PRKD3  | PKD3   | KINASE | 33  | >3 | <5.52 |
| PRKDC  | DNAPK  | KINASE | 319 | >3 | <5.52 |
| PRKDC  | DNAPK  | KINASE | 212 | >3 | <5.52 |
| PRKDC  | DNAPK  | KINASE | 330 | >3 | <5.52 |
| PRKDC  | DNAPK  | KINASE | 218 | >3 | <5.52 |
| PRKG1  | PKG1   | KINASE | 45  | >3 | <5.52 |
| PRKG1  | PKG1   | KINASE | 50  | >3 | <5.52 |
| PRKX   | PRKX   | KINASE | 7   | >3 | <5.52 |
| PRKX   | PRKX   | KINASE | 10  | >3 | <5.52 |
| PTK2   | FAK    | KINASE | 71  | >3 | <5.52 |
| PTK2   | FAK    | KINASE | 85  | >3 | <5.52 |
| PTK2B  | PYK2   | KINASE | 77  | >3 | <5.52 |
| PTK2B  | PYK2   | KINASE | 95  | >3 | <5.52 |
| PTK6   | BRK    | KINASE | 3   | >3 | <5.52 |
| RAF1   | RAF1   | KINASE | 3   | >3 | <5.52 |
| RAF1   | RAF1   | KINASE | 7   | >3 | <5.52 |
| RET    | RET    | KINASE | 39  | >3 | <5.52 |
| RIOK1  | RIOK1  | KINASE | 3   | >3 | <5.52 |
| RIOK2  | RIOK2  | KINASE | 3   | >3 | <5.52 |
| RIOK2  | RIOK2  | KINASE | 28  | >3 | <5.52 |
| RIOK2  | RIOK2  | KINASE | 5   | >3 | <5.52 |
| RIOK2  | RIOK2  | KINASE | 33  | >3 | <5.52 |
| RIPK1  | RIPK1  | KINASE | 3   | >3 | <5.52 |
| RIPK1  | RIPK1  | KINASE | 6   | >3 | <5.52 |
| RIPK2  | RIPK2  | KINASE | 9   | >3 | <5.52 |
| RIPK2  | RIPK2  | KINASE | 27  | >3 | <5.52 |
| RIPK2  | RIPK2  | KINASE | 13  | >3 | <5.52 |
| RIPK2  | RIPK2  | KINASE | 32  | >3 | <5.52 |
| RIPK3  | RIPK3  | KINASE | 3   | >3 | <5.52 |
| RIPK3  | RIPK3  | KINASE | 24  | >3 | <5.52 |
| RIPK4  | ANKRD3 | KINASE | 11  | >3 | <5.52 |
| RIPK4  | ANKRD3 | KINASE | 12  | >3 | <5.52 |
| RNASEL | RNAsel | KINASE | 3   | >3 | <5.52 |

|              |        |        |    |    |       |
|--------------|--------|--------|----|----|-------|
| RNASEL       | RNASEL | KINASE | 5  | >3 | <5.52 |
| ROCK1        | ROCK1  | KINASE | 7  | >3 | <5.52 |
| ROCK1        | ROCK1  | KINASE | 5  | >3 | <5.52 |
| ROCK2        | ROCK2  | KINASE | 17 | >3 | <5.52 |
| ROCK2        | ROCK2  | KINASE | 22 | >3 | <5.52 |
| RP6-213H19 1 | MST4   | KINASE | 5  | >3 | <5.52 |
| RP6-213H19 1 | MST4   | KINASE | 3  | >3 | <5.52 |
| RPS6KA1      | RSK3   | KINASE | 33 | >3 | <5.52 |
| RPS6KA1      | RSK3   | KINASE | 37 | >3 | <5.52 |
| RPS6KA2      | RSK1   | KINASE | 10 | >3 | <5.52 |
| RPS6KA2      | RSK1   | KINASE | 14 | >3 | <5.52 |
| RPS6KA3      | RSK2   | KINASE | 34 | >3 | <5.52 |
| RPS6KA3      | RSK2   | KINASE | 39 | >3 | <5.52 |
| RPS6KA4      | MSK2   | KINASE | 36 | >3 | <5.52 |
| RPS6KA4      | MSK2   | KINASE | 48 | >3 | <5.52 |
| RPS6KA5      | MSK1   | KINASE | 36 | >3 | <5.52 |
| RPS6KA5      | MSK1   | KINASE | 26 | >3 | <5.52 |
| RPS6KA6      | RSK4   | KINASE | 13 | >3 | <5.52 |
| RPS6KA6      | RSK4   | KINASE | 37 | >3 | <5.52 |
| RPS6KB1      | p70S6K | KINASE | 12 | >3 | <5.52 |
| RPS6KB1      | p70S6K | KINASE | 14 | >3 | <5.52 |
| SBK1         | SBK    | KINASE | 8  | >3 | <5.52 |
| SGK1         | SGK1   | KINASE | 2  | >3 | <5.52 |
| SGK1         | SGK1   | KINASE | 5  | >3 | <5.52 |
| SGK3         | SGK3   | KINASE | 9  | >3 | <5.52 |
| SGK3         | SGK3   | KINASE | 12 | >3 | <5.52 |
| SIK1         | SIK    | KINASE | 5  | >3 | <5.52 |
| SIK1         | SIK    | KINASE | 7  | >3 | <5.52 |
| SIK2         | QIK    | KINASE | 32 | >3 | <5.52 |
| SIK2         | QIK    | KINASE | 38 | >3 | <5.52 |
| SLK          | SLK    | KINASE | 82 | >3 | <5.52 |
| SLK          | SLK    | KINASE | 86 | >3 | <5.52 |
| SMG1         | SMG1   | KINASE | 4  | >3 | <5.52 |
| SNRK         | SNRK   | KINASE | 13 | >3 | <5.52 |
| SNRK         | SNRK   | KINASE | 10 | >3 | <5.52 |
| SRC          | SRC    | KINASE | 20 | >3 | <5.52 |
| SRC          | SRC    | KINASE | 22 | >3 | <5.52 |
| STK10        | LOK    | KINASE | 58 | >3 | <5.52 |
| STK10        | LOK    | KINASE | 80 | >3 | <5.52 |
| STK11        | LKB1   | KINASE | 8  | >3 | <5.52 |
| STK11        | LKB1   | KINASE | 8  | >3 | <5.52 |
| STK16        | MPSK1  | KINASE | 14 | >3 | <5.52 |
| STK16        | MPSK1  | KINASE | 15 | >3 | <5.52 |

|        |               |        |    |     |       |
|--------|---------------|--------|----|-----|-------|
| STK17A | DRAK1, SgK085 | KINASE | 6  | >3  | <5.52 |
| STK17A | DRAK1, SgK085 | KINASE | 14 | >3  | <5.52 |
| STK17B | DRAK2         | KINASE | 8  | >3  | <5.52 |
| STK17B | DRAK2         | KINASE | 9  | >3  | <5.52 |
| STK24  | MST3          | KINASE | 4  | >3  | <5.52 |
| STK25  | YSK1          | KINASE | 2  | >3  | <5.52 |
| STK25  | YSK1          | KINASE | 2  | >3  | <5.52 |
| STK3   | MST2          | KINASE | 18 | >3  | <5.52 |
| STK3   | MST2          | KINASE | 15 | >3  | <5.52 |
| STK32B | YANK1, YANK2  | KINASE | 8  | >3  | <5.52 |
| STK32C | YANK3         | KINASE | 2  | >3  | <5.52 |
| STK33  | STK33         | KINASE | 24 | 2.3 | 5.64  |
| STK33  | STK33         | KINASE | 21 | >3  | <5.52 |
| STK35  | CLIK1         | KINASE | 18 | >3  | <5.52 |
| STK35  | CLIK1         | KINASE | 24 | >3  | <5.52 |
| STK36  | Fused         | KINASE | 5  | >3  | <5.52 |
| STK38  | NDR1          | KINASE | 17 | >3  | <5.52 |
| STK38  | NDR1          | KINASE | 25 | >3  | <5.52 |
| STK38L | NDR2          | KINASE | 11 | >3  | <5.52 |
| STK38L | NDR2          | KINASE | 13 | >3  | <5.52 |
| STK39  | STLK3         | KINASE | 13 | >3  | <5.52 |
| STK39  | STLK3         | KINASE | 13 | >3  | <5.52 |
| STK4   | MST1          | KINASE | 25 | >3  | <5.52 |
| STK4   | MST1          | KINASE | 28 | >3  | <5.52 |
| STRADA | STLK5         | KINASE | 9  | >3  | <5.52 |
| STRADA | STLK5         | KINASE | 14 | >3  | <5.52 |
| SYK    | SYK           | KINASE | 28 | >3  | <5.52 |
| SYK    | SYK           | KINASE | 35 | >3  | <5.52 |
| TAOK1  | TAO1          | KINASE | 6  | >3  | <5.52 |
| TAOK1  | TAO1          | KINASE | 6  | >3  | <5.52 |
| TAOK2  | TAO2          | KINASE | 9  | >3  | <5.52 |
| TAOK2  | TAO2          | KINASE | 19 | >3  | <5.52 |
| TAOK3  | TAO3          | KINASE | 16 | >3  | <5.52 |
| TAOK3  | TAO3          | KINASE | 33 | >3  | <5.52 |
| TBK1   | TBK1          | KINASE | 45 | >3  | <5.52 |
| TBK1   | TBK1          | KINASE | 56 | >3  | <5.52 |
| TEC    | TEC           | KINASE | 52 | >3  | <5.52 |
| TEC    | TEC           | KINASE | 53 | >3  | <5.52 |
| TEK    | TIE2          | KINASE | 24 | >3  | <5.52 |
| TESK1  | TESK1         | KINASE | 11 | >3  | <5.52 |
| TESK1  | TESK1         | KINASE | 18 | >3  | <5.52 |
| TESK2  | TESK2         | KINASE | 16 | >3  | <5.52 |
| TESK2  | TESK2         | KINASE | 14 | >3  | <5.52 |

|        |             |        |    |     |       |
|--------|-------------|--------|----|-----|-------|
| TGFBR1 | TGFbR1      | KINASE | 25 | >3  | <5.52 |
| TGFBR1 | TGFbR1      | KINASE | 22 | >3  | <5.52 |
| TGFBR2 | TGFbR2      | KINASE | 22 | >3  | <5.52 |
| TGFBR2 | TGFbR2      | KINASE | 19 | >3  | <5.52 |
| TIE1   | TIE1        | KINASE | 2  | >3  | <5.52 |
| TLK1   | TLK1        | KINASE | 2  | >3  | <5.52 |
| TLK1   | TLK1        | KINASE | 3  | >3  | <5.52 |
| TLK2   | TLK2        | KINASE | 3  | >3  | <5.52 |
| TLK2   | TLK2        | KINASE | 3  | >3  | <5.52 |
| TNIK   | ZC2/TNIK    | KINASE | 44 | >3  | <5.52 |
| TNIK   | ZC2/TNIK    | KINASE | 41 | >3  | <5.52 |
| TNK1   | TNK1        | KINASE | 21 | >3  | <5.52 |
| TNK1   | TNK1        | KINASE | 4  | >3  | <5.52 |
| TNK2   | ACK         | KINASE | 27 | >3  | <5.52 |
| TNK2   | ACK         | KINASE | 32 | >3  | <5.52 |
| TP53RK | PRPK        | KINASE | 12 | >3  | <5.52 |
| TP53RK | PRPK        | KINASE | 13 | >3  | <5.52 |
| TRIO   | Trio        | KINASE | 5  | >3  | <5.52 |
| TRRAP  | TRRAP       | KINASE | 3  | >3  | <5.52 |
| TRRAP  | TRRAP       | KINASE | 20 | >3  | <5.52 |
| TRRAP  | TRRAP       | KINASE | 3  | >3  | <5.52 |
| TRRAP  | TRRAP       | KINASE | 26 | >3  | <5.52 |
| TTK    | TTK         | KINASE | 32 | 1.1 | 5.96  |
| TTK    | TTK         | KINASE | 37 | 1.6 | 5.80  |
| TTN    | TTN         | KINASE | 3  | >3  | <5.52 |
| TYK2   | TYK2        | KINASE | 57 | >3  | <5.52 |
| TYK2   | TYK2        | KINASE | 55 | >3  | <5.52 |
| TYRO3  | TYRO3       | KINASE | 10 | >3  | <5.52 |
| TYRO3  | TYRO3       | KINASE | 9  | >3  | <5.52 |
| UHMK1  | KIS         | KINASE | 3  | >3  | <5.52 |
| UHMK1  | KIS         | KINASE | 7  | >3  | <5.52 |
| ULK1   | ULK1        | KINASE | 23 | >3  | <5.52 |
| ULK1   | ULK1        | KINASE | 27 | >3  | <5.52 |
| ULK2   | ULK2        | KINASE | 2  | >3  | <5.52 |
| ULK2   | ULK2        | KINASE | 5  | >3  | <5.52 |
| ULK3   | ULK3        | KINASE | 26 | >3  | <5.52 |
| ULK3   | ULK3        | KINASE | 29 | >3  | <5.52 |
| WEE1   | Wee1, Wee1B | KINASE | 39 | >3  | <5.52 |
| WEE1   | Wee1, Wee1B | KINASE | 46 | >3  | <5.52 |
| WNK1   | Wnk1        | KINASE | 9  | >3  | <5.52 |
| WNK1   | Wnk1        | KINASE | 27 | >3  | <5.52 |
| WNK2   | Wnk2        | KINASE | 7  | >3  | <5.52 |
| YES1   | YES         | KINASE | 19 | >3  | <5.52 |

|       |       |        |    |    |       |
|-------|-------|--------|----|----|-------|
| YES1  | YES   | KINASE | 17 | >3 | <5.52 |
| ZAK   | ZAK   | KINASE | 20 | >3 | <5.52 |
| ZAK   | ZAK   | KINASE | 23 | >3 | <5.52 |
| ZAP70 | ZAP70 | KINASE | 5  | >3 | <5.52 |



**Supplementary Table S2.** Individual kinase data of compound **40** determined using Kinobeads and Lipid-Kinobeads (qupm = quantified unique peptides measured).

| Clustername | Focusname                  | Focusgroup       | qupm | IC <sub>50</sub> [uM] | pIC50 |
|-------------|----------------------------|------------------|------|-----------------------|-------|
| AAK1        | AAK1                       | KINASE           | 38   | >3                    | <5.52 |
| AAK1        | AAK1                       | KINASE           | 38   | >3                    | <5.52 |
| ABL1        | ABL                        | KINASE           | 69   | >3                    | <5.52 |
| ABL1        | ABL                        | KINASE           | 78   | >3                    | <5.52 |
| ABL2        | ARG                        | KINASE           | 49   | >3                    | <5.52 |
| ABL2        | ARG                        | KINASE           | 59   | >3                    | <5.52 |
| ACVR1       | ALK2                       | KINASE           | 18   | >3                    | <5.52 |
| ACVR1       | ALK2                       | KINASE           | 20   | >3                    | <5.52 |
| ACVR1B      | Afg3-like protein 1A, ALK4 | PROTEASE, KINASE | 17   | >3                    | <5.52 |
| ACVR1B      | Afg3-like protein 1A, ALK4 | KINASE, PROTEASE | 16   | >3                    | <5.52 |
| ACVR1C      | ALK7                       | KINASE           | 2    | >3                    | <5.52 |
| ACVR2A      | ACTR2                      | KINASE           | 16   | >3                    | <5.52 |
| ACVR2A      | ACTR2                      | KINASE           | 17   | >3                    | <5.52 |
| ACVR2B      | ACTR2B                     | KINASE           | 20   | >3                    | <5.52 |
| ACVR2B      | ACTR2B                     | KINASE           | 16   | >3                    | <5.52 |
| ACVRL1      | ALK1                       | KINASE           | 7    | >3                    | <5.52 |
| ACVRL1      | ALK1                       | KINASE           | 10   | >3                    | <5.52 |
| ADCK1       | ADCK1                      | KINASE           | 26   | >3                    | <5.52 |
| ADCK1       | ADCK1                      | KINASE           | 4    | >3                    | <5.52 |
| ADCK1       | ADCK1                      | KINASE           | 24   | >3                    | <5.52 |
| ADCK1       | ADCK1                      | KINASE           | 5    | >3                    | <5.52 |
| ADCK4       | ADCK4                      | KINASE           | 7    | >3                    | <5.52 |
| ADCK4       | ADCK4                      | KINASE           | 4    | >3                    | <5.52 |
| ADCK5       | ADCK5                      | KINASE           | 9    | >3                    | <5.52 |
| ADCK5       | ADCK5                      | KINASE           | 9    | >3                    | <5.52 |
| ADRBK1      | BARK1                      | KINASE           | 2    | >3                    | <5.52 |
| AKT1        | AKT1                       | KINASE           | 15   | >3                    | <5.52 |
| AKT1        | AKT1                       | KINASE           | 18   | >3                    | <5.52 |
| AKT2        | AKT2                       | KINASE           | 14   | >3                    | <5.52 |
| AKT2        | AKT2                       | KINASE           | 16   | >3                    | <5.52 |
| ARAF        | ARAF                       | KINASE           | 15   | >3                    | <5.52 |
| ARAF        | ARAF                       | KINASE           | 17   | >3                    | <5.52 |
| ARAF        | ARAF                       | KINASE           | 2    | >3                    | <5.52 |
| ATM         | ATM                        | KINASE           | 38   | >3                    | <5.52 |
| ATM         | ATM                        | KINASE           | 65   | >3                    | <5.52 |
| ATM         | ATM                        | KINASE           | 28   | >3                    | <5.52 |
| ATM         | ATM                        | KINASE           | 51   | >3                    | <5.52 |
| ATR         | ATR                        | KINASE           | 25   | >3                    | <5.52 |
| ATR         | ATR                        | KINASE           | 4    | >3                    | <5.52 |

|        |                               |                  |    |     |       |
|--------|-------------------------------|------------------|----|-----|-------|
| ATR    | ATR                           | KINASE           | 12 | >3  | <5.52 |
| ATR    | ATR                           | KINASE           | 13 | >3  | <5.52 |
| AURKA  | AurA                          | KINASE           | 34 | >3  | <5.52 |
| AURKA  | AurA                          | KINASE           | 34 | >3  | <5.52 |
| AURKB  | AurB                          | KINASE           | 27 | >3  | <5.52 |
| AURKB  | AurB                          | KINASE           | 27 | >3  | <5.52 |
| AURKC  | AurC                          | KINASE           | 4  | 1.5 | 5.82  |
| AURKC  | AurC                          | KINASE           | 5  | 2.1 | 5.68  |
| AXL    | AXL                           | KINASE           | 30 | >3  | <5.52 |
| AXL    | AXL                           | KINASE           | 32 | >3  | <5.52 |
| BCR    | BCR, complement component C2a | KINASE, PROTEASE | 67 | >3  | <5.52 |
| BCR    | BCR                           | KINASE           | 68 | >3  | <5.52 |
| BMP2K  | BIKE                          | KINASE           | 51 | >3  | <5.52 |
| BMP2K  | BIKE                          | KINASE           | 51 | >3  | <5.52 |
| BMP2K  | BIKE                          | KINASE           | 2  | >3  | <5.52 |
| BMPR1A | BMPR1A                        | KINASE           | 17 | >3  | <5.52 |
| BMPR1A | BMPR1A                        | KINASE           | 20 | >3  | <5.52 |
| BMPR1B | BMPR1B                        | KINASE           | 14 | >3  | <5.52 |
| BMPR1B | BMPR1B                        | KINASE           | 19 | >3  | <5.52 |
| BMPR2  | BMPR2                         | KINASE           | 24 | >3  | <5.52 |
| BMPR2  | BMPR2                         | KINASE           | 23 | >3  | <5.52 |
| BMX    | BMX                           | KINASE           | 27 | >3  | <5.52 |
| BMX    | BMX                           | KINASE           | 26 | >3  | <5.52 |
| BRAF   | BRAF                          | KINASE           | 25 | >3  | <5.52 |
| BRAF   | BRAF                          | KINASE           | 30 | >3  | <5.52 |
| BRD2   | BRD2                          | KINASE, BROMO    | 16 | >3  | <5.52 |
| BRD2   | BRD2                          | KINASE, BROMO    | 12 | >3  | <5.52 |
| BRD3   | BRD3                          | KINASE, BROMO    | 21 | >3  | <5.52 |
| BRD3   | BRD3                          | BROMO, KINASE    | 26 | >3  | <5.52 |
| BRD4   | BRD4                          | KINASE, BROMO    | 4  | >3  | <5.52 |
| BRD4   | BRD4                          | KINASE, BROMO    | 35 | >3  | <5.52 |
| BRD4   | BRD4                          | KINASE, BROMO    | 5  | >3  | <5.52 |
| BRD4   | BRD4                          | KINASE, BROMO    | 38 | >3  | <5.52 |
| BRSK1  | BRSK1                         | KINASE           | 6  | >3  | <5.52 |
| BRSK1  | BRSK1                         | KINASE           | 6  | >3  | <5.52 |
| BRSK2  | BRSK2                         | KINASE           | 23 | >3  | <5.52 |
| BRSK2  | BRSK2                         | KINASE           | 23 | >3  | <5.52 |
| BTK    | BTK                           | KINASE           | 57 | >3  | <5.52 |
| BTK    | BTK                           | KINASE           | 60 | >3  | <5.52 |
| BUB1   | BUB1                          | KINASE           | 42 | >3  | <5.52 |
| BUB1   | BUB1                          | KINASE           | 44 | >3  | <5.52 |
| BUB1B  | BUBR1                         | KINASE           | 2  | >3  | <5.52 |
| CABC1  | ADCK3                         | KINASE           | 32 | >3  | <5.52 |

|          |         |        |    |    |       |
|----------|---------|--------|----|----|-------|
| CABC1    | ADCK3   | KINASE | 3  | >3 | <5.52 |
| CABC1    | ADCK3   | KINASE | 38 | >3 | <5.52 |
| CABC1    | ADCK3   | KINASE | 2  | >3 | <5.52 |
| CAMK1    | CaMK1a  | KINASE | 4  | >3 | <5.52 |
| CAMK1    | CaMK1a  | KINASE | 5  | >3 | <5.52 |
| CAMK1D   | CaMK1d  | KINASE | 4  | >3 | <5.52 |
| CAMK1D   | CaMK1d  | KINASE | 4  | >3 | <5.52 |
| CAMK2A   | CaMK2a  | KINASE | 3  | >3 | <5.52 |
| CAMK2A   | CaMK2a  | KINASE | 2  | >3 | <5.52 |
| CAMK2B   | CaMK2b  | KINASE | 13 | >3 | <5.52 |
| CAMK2B   | CaMK2b  | KINASE | 12 | >3 | <5.52 |
| CAMK2D   | CaMK2d  | KINASE | 27 | >3 | <5.52 |
| CAMK2D   | CaMK2d  | KINASE | 29 | >3 | <5.52 |
| CAMK2G   | CaMK2g  | KINASE | 26 | >3 | <5.52 |
| CAMK2G   | CaMK2g  | KINASE | 27 | >3 | <5.52 |
| CAMK4    | CaMK4   | KINASE | 8  | >3 | <5.52 |
| CAMK4    | CaMK4   | KINASE | 8  | >3 | <5.52 |
| CAMKK1   | CaMKK1  | KINASE | 23 | >3 | <5.52 |
| CAMKK1   | CaMKK1  | KINASE | 25 | >3 | <5.52 |
| CAMKK2   | CaMKK2  | KINASE | 33 | >3 | <5.52 |
| CAMKK2   | CaMKK2  | KINASE | 36 | >3 | <5.52 |
| CASK     | CASK    | KINASE | 14 | >3 | <5.52 |
| CASK     | CASK    | KINASE | 7  | >3 | <5.52 |
| CDC2     | CDC2    | KINASE | 20 | >3 | <5.52 |
| CDC2     | CDC2    | KINASE | 23 | >3 | <5.52 |
| CDC2L1   | PITSLRE | KINASE | 5  | >3 | <5.52 |
| CDC2L1   | PITSLRE | KINASE | 3  | >3 | <5.52 |
| CDC2L5   | CHED    | KINASE | 10 | >3 | <5.52 |
| CDC2L5   | CHED    | KINASE | 16 | >3 | <5.52 |
| CDC42BPA | MRCKa   | KINASE | 38 | >3 | <5.52 |
| CDC42BPA | MRCKa   | KINASE | 47 | >3 | <5.52 |
| CDC42BPB | MRCKb   | KINASE | 49 | >3 | <5.52 |
| CDC42BPB | MRCKb   | KINASE | 50 | >3 | <5.52 |
| CDC42BPG | DMPK2   | KINASE | 25 | >3 | <5.52 |
| CDC42BPG | DMPK2   | KINASE | 25 | >3 | <5.52 |
| CDC7     | CDC7    | KINASE | 14 | >3 | <5.52 |
| CDC7     | CDC7    | KINASE | 10 | >3 | <5.52 |
| CDK10    | CDK10   | KINASE | 15 | >3 | <5.52 |
| CDK10    | CDK10   | KINASE | 14 | >3 | <5.52 |
| CDK2     | CDK2    | KINASE | 26 | >3 | <5.52 |
| CDK2     | CDK2    | KINASE | 25 | >3 | <5.52 |
| CDK4     | CDK4    | KINASE | 8  | >3 | <5.52 |
| CDK4     | CDK4    | KINASE | 8  | >3 | <5.52 |

|         |       |        |     |     |       |
|---------|-------|--------|-----|-----|-------|
| CDK5    | CDK5  | KINASE | 27  | >3  | <5.52 |
| CDK5    | CDK5  | KINASE | 27  | >3  | <5.52 |
| CDK6    | CDK6  | KINASE | 3   | >3  | <5.52 |
| CDK6    | CDK6  | KINASE | 2   | >3  | <5.52 |
| CDK7    | CDK7  | KINASE | 16  | >3  | <5.52 |
| CDK7    | CDK7  | KINASE | 18  | >3  | <5.52 |
| CDK8    | CDK8  | KINASE | 6   | >3  | <5.52 |
| CDK8    | CDK8  | KINASE | 6   | >3  | <5.52 |
| CDK9    | CDK9  | KINASE | 25  | >3  | <5.52 |
| CDK9    | CDK9  | KINASE | 24  | >3  | <5.52 |
| CDKL2   | CDKL2 | KINASE | 3   | >3  | <5.52 |
| CDKL2   | CDKL2 | KINASE | 2   | >3  | <5.52 |
| CDKL5   | CDKL5 | KINASE | 14  | >3  | <5.52 |
| CDKL5   | CDKL5 | KINASE | 13  | >3  | <5.52 |
| CHEK1   | CHK1  | KINASE | 30  | >3  | <5.52 |
| CHEK1   | CHK1  | KINASE | 29  | >3  | <5.52 |
| CHEK2   | CHK2  | KINASE | 27  | 1.9 | 5.72  |
| CHEK2   | CHK2  | KINASE | 27  | >3  | <5.52 |
| CHUK    | IKKa  | KINASE | 27  | >3  | <5.52 |
| CHUK    | IKKa  | KINASE | 23  | >3  | <5.52 |
| CIT     | CRIK  | KINASE | 108 | >3  | <5.52 |
| CIT     | CRIK  | KINASE | 107 | >3  | <5.52 |
| CLK1    | CLK1  | KINASE | 12  | >3  | <5.52 |
| CLK1    | CLK1  | KINASE | 14  | >3  | <5.52 |
| CLK2    | CLK2  | KINASE | 6   | >3  | <5.52 |
| CLK2    | CLK2  | KINASE | 4   | >3  | <5.52 |
| CRKRS   | CRK7  | KINASE | 32  | >3  | <5.52 |
| CRKRS   | CRK7  | KINASE | 33  | >3  | <5.52 |
| CSF1R   | FMS   | KINASE | 11  | >3  | <5.52 |
| CSF1R   | FMS   | KINASE | 14  | >3  | <5.52 |
| CSK     | CSK   | KINASE | 38  | >3  | <5.52 |
| CSK     | CSK   | KINASE | 43  | >3  | <5.52 |
| CSNK1A1 | CK1a  | KINASE | 20  | >3  | <5.52 |
| CSNK1A1 | CK1a  | KINASE | 21  | >3  | <5.52 |
| CSNK1D  | CK1d  | KINASE | 8   | >3  | <5.52 |
| CSNK1D  | CK1d  | KINASE | 10  | >3  | <5.52 |
| CSNK1E  | CK1e  | KINASE | 14  | >3  | <5.52 |
| CSNK1E  | CK1e  | KINASE | 14  | >3  | <5.52 |
| CSNK1G1 | CK1g1 | KINASE | 4   | 1.1 | 5.96  |
| CSNK1G1 | CK1g1 | KINASE | 4   | >3  | <5.52 |
| CSNK1G2 | CK1g2 | KINASE | 3   | 2.1 | 5.68  |
| CSNK1G2 | CK1g2 | KINASE | 3   | 2.7 | 5.57  |
| CSNK1G3 | CK1g3 | KINASE | 5   | 2.3 | 5.64  |

|         |              |        |    |      |       |
|---------|--------------|--------|----|------|-------|
| CSNK1G3 | CK1g3        | KINASE | 5  | 2.7  | 5.57  |
| CSNK2A1 | CK2a1        | KINASE | 11 | 1.5  | 5.82  |
| CSNK2A1 | CK2a1        | KINASE | 13 | 1.7  | 5.77  |
| CSNK2A1 | CK2a1        | KINASE | 6  | >3   | <5.52 |
| CSNK2A1 | CK2a1        | KINASE | 25 | >3   | <5.52 |
| CSNK2A2 | CK2a2        | KINASE | 24 | 0.58 | 6.24  |
| CSNK2A2 | CK2a2        | KINASE | 23 | 0.89 | 6.05  |
| CSNK2A2 | CK2a2        | KINASE | 27 | >3   | <5.52 |
| CSNK2A2 | CK2a2        | KINASE | 30 | >3   | <5.52 |
| DAPK1   | DAPK1        | KINASE | 43 | >3   | <5.52 |
| DAPK1   | DAPK1        | KINASE | 44 | >3   | <5.52 |
| DAPK2   | DAPK2        | KINASE | 4  | >3   | <5.52 |
| DAPK2   | DAPK2        | KINASE | 6  | >3   | <5.52 |
| DAPK3   | DAPK3        | KINASE | 11 | >3   | <5.52 |
| DAPK3   | DAPK3        | KINASE | 12 | >3   | <5.52 |
| DDR1    | DDR1         | KINASE | 30 | >3   | <5.52 |
| DDR1    | DDR1         | KINASE | 28 | >3   | <5.52 |
| DDR2    | DDR2         | KINASE | 15 | >3   | <5.52 |
| DDR2    | DDR2         | KINASE | 14 | >3   | <5.52 |
| DSTYK   | SgK496       | KINASE | 20 | >3   | <5.52 |
| DSTYK   | SgK496       | KINASE | 24 | >3   | <5.52 |
| DYRK1A  | DYRK1A       | KINASE | 24 | >3   | <5.52 |
| DYRK1A  | DYRK1A       | KINASE | 29 | >3   | <5.52 |
| DYRK1B  | DYRK1B       | KINASE | 10 | >3   | <5.52 |
| DYRK1B  | DYRK1B       | KINASE | 11 | >3   | <5.52 |
| DYRK2   | DYRK2        | KINASE | 6  | 2    | 5.70  |
| DYRK2   | DYRK2        | KINASE | 9  | >3   | <5.52 |
| EGFR    | EGFR         | KINASE | 72 | >3   | <5.52 |
| EGFR    | EGFR         | KINASE | 75 | >3   | <5.52 |
| EIF2AK1 | HRI          | KINASE | 21 | 1.7  | 5.77  |
| EIF2AK1 | HRI          | KINASE | 20 | 1.9  | 5.72  |
| EIF2AK2 | PKR          | KINASE | 15 | >3   | <5.52 |
| EIF2AK2 | PKR          | KINASE | 13 | >3   | <5.52 |
| EIF2AK3 | PEK          | KINASE | 21 | >3   | <5.52 |
| EIF2AK3 | PEK          | KINASE | 15 | >3   | <5.52 |
| EIF2AK4 | GCN2         | KINASE | 82 | >3   | <5.52 |
| EIF2AK4 | GCN2         | KINASE | 81 | >3   | <5.52 |
| EPHA1   | EphA1        | KINASE | 28 | >3   | <5.52 |
| EPHA1   | EphA1        | KINASE | 21 | >3   | <5.52 |
| EPHA2   | EphA2        | KINASE | 43 | >3   | <5.52 |
| EPHA2   | EphA2        | KINASE | 45 | >3   | <5.52 |
| EPHA3   | EphA3, EphA6 | KINASE | 47 | >3   | <5.52 |
| EPHA3   | EphA3, EphA6 | KINASE | 45 | >3   | <5.52 |

|       |            |        |    |    |       |
|-------|------------|--------|----|----|-------|
| EPHA4 | EphA4      | KINASE | 41 | >3 | <5.52 |
| EPHA4 | EphA4      | KINASE | 38 | >3 | <5.52 |
| EPHA5 | EphA5      | KINASE | 18 | >3 | <5.52 |
| EPHA5 | EphA5      | KINASE | 14 | >3 | <5.52 |
| EPHA7 | EphA7      | KINASE | 36 | >3 | <5.52 |
| EPHA7 | EphA7      | KINASE | 35 | >3 | <5.52 |
| EPHB1 | EphB1      | KINASE | 28 | >3 | <5.52 |
| EPHB1 | EphB1      | KINASE | 26 | >3 | <5.52 |
| EPHB2 | EphB2      | KINASE | 31 | >3 | <5.52 |
| EPHB2 | EphB2      | KINASE | 34 | >3 | <5.52 |
| EPHB3 | EphB3      | KINASE | 31 | >3 | <5.52 |
| EPHB3 | EphB3      | KINASE | 22 | >3 | <5.52 |
| EPHB4 | EphB4      | KINASE | 48 | >3 | <5.52 |
| EPHB4 | EphB4      | KINASE | 52 | >3 | <5.52 |
| EPHB6 | EphB6      | KINASE | 29 | >3 | <5.52 |
| EPHB6 | EphB6      | KINASE | 35 | >3 | <5.52 |
| ERBB2 | HER2/ErbB2 | KINASE | 2  | >3 | <5.52 |
| ERBB3 | HER3/ErbB3 | KINASE | 2  | >3 | <5.52 |
| ERBB4 | HER4/ErbB4 | KINASE | 19 | >3 | <5.52 |
| ERBB4 | HER4/ErbB4 | KINASE | 19 | >3 | <5.52 |
| ERN1  | IRE1       | KINASE | 27 | >3 | <5.52 |
| ERN1  | IRE1       | KINASE | 31 | >3 | <5.52 |
| FER   | FER        | KINASE | 64 | >3 | <5.52 |
| FER   | FER        | KINASE | 64 | >3 | <5.52 |
| FES   | FES        | KINASE | 46 | >3 | <5.52 |
| FES   | FES        | KINASE | 41 | >3 | <5.52 |
| FGFR1 | FGFR1      | KINASE | 21 | >3 | <5.52 |
| FGFR1 | FGFR1      | KINASE | 26 | >3 | <5.52 |
| FGFR2 | FGFR2      | KINASE | 14 | >3 | <5.52 |
| FGFR2 | FGFR2      | KINASE | 17 | >3 | <5.52 |
| FGFR3 | FGFR3      | KINASE | 11 | >3 | <5.52 |
| FGFR3 | FGFR3      | KINASE | 12 | >3 | <5.52 |
| FGFR4 | FGFR4      | KINASE | 3  | >3 | <5.52 |
| FGFR4 | FGFR4      | KINASE | 6  | >3 | <5.52 |
| FGR   | FGR        | KINASE | 18 | >3 | <5.52 |
| FGR   | FGR        | KINASE | 12 | >3 | <5.52 |
| FLT1  | FLT1       | KINASE | 9  | >3 | <5.52 |
| FLT1  | FLT1       | KINASE | 3  | >3 | <5.52 |
| FLT4  | FLT4       | KINASE | 38 | >3 | <5.52 |
| FLT4  | FLT4       | KINASE | 35 | >3 | <5.52 |
| FRK   | FRK        | KINASE | 17 | >3 | <5.52 |
| FRK   | FRK        | KINASE | 20 | >3 | <5.52 |
| FYN   | FYN        | KINASE | 35 | >3 | <5.52 |

|       |        |        |    |    |       |
|-------|--------|--------|----|----|-------|
| FYN   | FYN    | KINASE | 38 | >3 | <5.52 |
| GAK   | GAK    | KINASE | 81 | >3 | <5.52 |
| GAK   | GAK    | KINASE | 82 | >3 | <5.52 |
| GRK6  | GPRK6  | KINASE | 2  | >3 | <5.52 |
| GSG2  | Haspin | KINASE | 3  | >3 | <5.52 |
| GSK3A | GSK3A  | KINASE | 16 | >3 | <5.52 |
| GSK3A | GSK3A  | KINASE | 3  | >3 | <5.52 |
| GSK3A | GSK3A  | KINASE | 18 | >3 | <5.52 |
| GSK3A | GSK3A  | KINASE | 3  | >3 | <5.52 |
| GSK3B | GSK3B  | KINASE | 25 | >3 | <5.52 |
| GSK3B | GSK3B  | KINASE | 6  | >3 | <5.52 |
| GSK3B | GSK3B  | KINASE | 23 | >3 | <5.52 |
| GSK3B | GSK3B  | KINASE | 6  | >3 | <5.52 |
| HCK   | HCK    | KINASE | 27 | >3 | <5.52 |
| HCK   | HCK    | KINASE | 30 | >3 | <5.52 |
| HIPK1 | HIPK1  | KINASE | 12 | >3 | <5.52 |
| HIPK1 | HIPK1  | KINASE | 10 | >3 | <5.52 |
| HIPK2 | HIPK2  | KINASE | 13 | >3 | <5.52 |
| HIPK2 | HIPK2  | KINASE | 13 | >3 | <5.52 |
| HIPK3 | HIPK3  | KINASE | 14 | >3 | <5.52 |
| HIPK3 | HIPK3  | KINASE | 13 | >3 | <5.52 |
| ICK   | ICK    | KINASE | 19 | >3 | <5.52 |
| ICK   | ICK    | KINASE | 15 | >3 | <5.52 |
| IGF1R | IGF1R  | KINASE | 53 | >3 | <5.52 |
| IGF1R | IGF1R  | KINASE | 54 | >3 | <5.52 |
| IKBKB | IKKb   | KINASE | 24 | >3 | <5.52 |
| IKBKB | IKKb   | KINASE | 19 | >3 | <5.52 |
| IKBKE | IKKe   | KINASE | 31 | >3 | <5.52 |
| IKBKE | IKKe   | KINASE | 25 | >3 | <5.52 |
| ILK   | ILK    | KINASE | 15 | >3 | <5.52 |
| ILK   | ILK    | KINASE | 15 | >3 | <5.52 |
| INSR  | INSR   | KINASE | 60 | >3 | <5.52 |
| INSR  | INSR   | KINASE | 54 | >3 | <5.52 |
| IRAK1 | IRAK1  | KINASE | 19 | >3 | <5.52 |
| IRAK1 | IRAK1  | KINASE | 20 | >3 | <5.52 |
| IRAK3 | IRAK3  | KINASE | 20 | >3 | <5.52 |
| IRAK3 | IRAK3  | KINASE | 20 | >3 | <5.52 |
| IRAK4 | IRAK4  | KINASE | 40 | >3 | <5.52 |
| IRAK4 | IRAK4  | KINASE | 42 | >3 | <5.52 |
| ITK   | ITK    | KINASE | 23 | >3 | <5.52 |
| ITK   | ITK    | KINASE | 20 | >3 | <5.52 |
| JAK1  | JAK1   | KINASE | 83 | >3 | <5.52 |
| JAK1  | JAK1   | KINASE | 88 | >3 | <5.52 |

|              |        |        |    |        |       |
|--------------|--------|--------|----|--------|-------|
| JAK2         | JAK2   | KINASE | 42 | >3     | <5.52 |
| JAK2         | JAK2   | KINASE | 46 | >3     | <5.52 |
| JAK3         | JAK3   | KINASE | 21 | >3     | <5.52 |
| JAK3         | JAK3   | KINASE | 19 | >3     | <5.52 |
| KDR          | KDR    | KINASE | 20 | >3     | <5.52 |
| KDR          | KDR    | KINASE | 22 | >3     | <5.52 |
| KIAA0999     | QSK    | KINASE | 45 | >3     | <5.52 |
| KIAA0999     | QSK    | KINASE | 42 | >3     | <5.52 |
| KIAA1804     | MLK4   | KINASE | 34 | >3     | <5.52 |
| KIAA1804     | MLK4   | KINASE | 29 | >3     | <5.52 |
| KIT          | KIT    | KINASE | 27 | >3     | <5.52 |
| KIT          | KIT    | KINASE | 27 | >3     | <5.52 |
| KSR1         | KSR1   | KINASE | 15 | >3     | <5.52 |
| KSR1         | KSR1   | KINASE | 18 | >3     | <5.52 |
| LATS1        | LATS1  | KINASE | 44 | >3     | <5.52 |
| LATS1        | LATS1  | KINASE | 45 | >3     | <5.52 |
| LATS2        | LATS2  | KINASE | 17 | >3     | <5.52 |
| LATS2        | LATS2  | KINASE | 11 | >3     | <5.52 |
| LCK          | LCK    | KINASE | 14 | >3     | <5.52 |
| LCK          | LCK    | KINASE | 10 | >3     | <5.52 |
| LIMK1        | LIMK1  | KINASE | 32 | >3     | <5.52 |
| LIMK1        | LIMK1  | KINASE | 32 | >3     | <5.52 |
| LIMK2        | LIMK2  | KINASE | 24 | >3     | <5.52 |
| LIMK2        | LIMK2  | KINASE | 22 | >3     | <5.52 |
| LOC100128443 | MAST4  | KINASE | 17 | >3     | <5.52 |
| LOC100128443 | MAST4  | KINASE | 12 | >3     | <5.52 |
| LRRK2        | LRRK2  | KINASE | 21 | 0.0066 | 8.18  |
| LRRK2        | LRRK2  | KINASE | 24 | 0.015  | 7.82  |
| LTK          | LTK    | KINASE | 2  | >3     | <5.52 |
| LTK          | LTK    | KINASE | 3  | >3     | <5.52 |
| LYN          | LYN    | KINASE | 45 | >3     | <5.52 |
| LYN          | LYN    | KINASE | 50 | >3     | <5.52 |
| MAP2K1       | MAP2K1 | KINASE | 14 | >3     | <5.52 |
| MAP2K1       | MAP2K1 | KINASE | 16 | >3     | <5.52 |
| MAP2K2       | MAP2K2 | KINASE | 17 | >3     | <5.52 |
| MAP2K2       | MAP2K2 | KINASE | 22 | >3     | <5.52 |
| MAP2K3       | MAP2K3 | KINASE | 16 | >3     | <5.52 |
| MAP2K3       | MAP2K3 | KINASE | 15 | >3     | <5.52 |
| MAP2K4       | MAP2K4 | KINASE | 21 | >3     | <5.52 |
| MAP2K4       | MAP2K4 | KINASE | 19 | >3     | <5.52 |
| MAP2K5       | MAP2K5 | KINASE | 25 | >3     | <5.52 |
| MAP2K5       | MAP2K5 | KINASE | 27 | >3     | <5.52 |
| MAP2K6       | MAP2K6 | KINASE | 19 | 0.7    | 6.15  |



|         |         |        |    |     |       |
|---------|---------|--------|----|-----|-------|
| MAP2K6  | MAP2K6  | KINASE | 17 | 1.1 | 5.96  |
| MAP2K7  | MAP2K7  | KINASE | 2  | >3  | <5.52 |
| MAP2K7  | MAP2K7  | KINASE | 3  | >3  | <5.52 |
| MAP3K1  | MAP3K1  | KINASE | 44 | >3  | <5.52 |
| MAP3K1  | MAP3K1  | KINASE | 39 | >3  | <5.52 |
| MAP3K10 | MLK2    | KINASE | 8  | >3  | <5.52 |
| MAP3K10 | MLK2    | KINASE | 7  | >3  | <5.52 |
| MAP3K11 | MLK3    | KINASE | 22 | >3  | <5.52 |
| MAP3K11 | MLK3    | KINASE | 28 | >3  | <5.52 |
| MAP3K12 | DLK     | KINASE | 3  | >3  | <5.52 |
| MAP3K13 | LZK     | KINASE | 8  | >3  | <5.52 |
| MAP3K13 | LZK     | KINASE | 5  | >3  | <5.52 |
| MAP3K15 | MAP3K7  | KINASE | 29 | >3  | <5.52 |
| MAP3K15 | MAP3K7  | KINASE | 23 | >3  | <5.52 |
| MAP3K2  | MAP3K2  | KINASE | 26 | >3  | <5.52 |
| MAP3K2  | MAP3K2  | KINASE | 23 | >3  | <5.52 |
| MAP3K3  | MAP3K3  | KINASE | 27 | >3  | <5.52 |
| MAP3K3  | MAP3K3  | KINASE | 29 | >3  | <5.52 |
| MAP3K4  | MAP3K4  | KINASE | 84 | >3  | <5.52 |
| MAP3K4  | MAP3K4  | KINASE | 89 | >3  | <5.52 |
| MAP3K5  | MAP3K5  | KINASE | 55 | >3  | <5.52 |
| MAP3K5  | MAP3K5  | KINASE | 47 | >3  | <5.52 |
| MAP3K6  | MAP3K6  | KINASE | 34 | >3  | <5.52 |
| MAP3K6  | MAP3K6  | KINASE | 29 | >3  | <5.52 |
| MAP3K7  | TAK1    | KINASE | 26 | >3  | <5.52 |
| MAP3K7  | TAK1    | KINASE | 25 | >3  | <5.52 |
| MAP3K9  | MLK1    | KINASE | 9  | >3  | <5.52 |
| MAP3K9  | MLK1    | KINASE | 8  | >3  | <5.52 |
| MAP4K1  | HPK1    | KINASE | 9  | >3  | <5.52 |
| MAP4K1  | HPK1    | KINASE | 8  | >3  | <5.52 |
| MAP4K2  | GCK     | KINASE | 25 | >3  | <5.52 |
| MAP4K2  | GCK     | KINASE | 24 | >3  | <5.52 |
| MAP4K3  | KHS2    | KINASE | 21 | >3  | <5.52 |
| MAP4K3  | KHS2    | KINASE | 23 | >3  | <5.52 |
| MAP4K4  | ZC1/HGK | KINASE | 48 | >3  | <5.52 |
| MAP4K4  | ZC1/HGK | KINASE | 59 | >3  | <5.52 |
| MAP4K5  | KHS1    | KINASE | 36 | >3  | <5.52 |
| MAP4K5  | KHS1    | KINASE | 34 | >3  | <5.52 |
| MAPK1   | Erk2    | KINASE | 25 | >3  | <5.52 |
| MAPK1   | Erk2    | KINASE | 27 | >3  | <5.52 |
| MAPK10  | JNK3    | KINASE | 5  | >3  | <5.52 |
| MAPK10  | JNK3    | KINASE | 4  | >3  | <5.52 |
| MAPK11  | p38b    | KINASE | 8  | >3  | <5.52 |

|          |          |        |    |      |       |
|----------|----------|--------|----|------|-------|
| MAPK11   | p38b     | KINASE | 9  | >3   | <5.52 |
| MAPK12   | p38g     | KINASE | 2  | >3   | <5.52 |
| MAPK14   | p38a     | KINASE | 27 | >3   | <5.52 |
| MAPK14   | p38a     | KINASE | 25 | >3   | <5.52 |
| MAPK15   | Erk7     | KINASE | 9  | >3   | <5.52 |
| MAPK15   | Erk7     | KINASE | 8  | >3   | <5.52 |
| MAPK3    | Erk1     | KINASE | 19 | >3   | <5.52 |
| MAPK3    | Erk1     | KINASE | 19 | >3   | <5.52 |
| MAPK4    | Erk4     | KINASE | 2  | >3   | <5.52 |
| MAPK6    | Erk3     | KINASE | 15 | >3   | <5.52 |
| MAPK6    | Erk3     | KINASE | 11 | >3   | <5.52 |
| MAPK7    | Erk5     | KINASE | 26 | >3   | <5.52 |
| MAPK7    | Erk5     | KINASE | 27 | >3   | <5.52 |
| MAPK8    | JNK1     | KINASE | 21 | >3   | <5.52 |
| MAPK8    | JNK1     | KINASE | 23 | >3   | <5.52 |
| MAPK9    | JNK2     | KINASE | 3  | 0.98 | 6.01  |
| MAPK9    | JNK2     | KINASE | 5  | 1.1  | 5.96  |
| MAPK9    | JNK2     | KINASE | 21 | >3   | <5.52 |
| MAPK9    | JNK2     | KINASE | 26 | >3   | <5.52 |
| MAPKAPK2 | MAPKAPK2 | KINASE | 2  | >3   | <5.52 |
| MAPKAPK2 | MAPKAPK2 | KINASE | 4  | >3   | <5.52 |
| MAPKAPK3 | MAPKAPK3 | KINASE | 9  | >3   | <5.52 |
| MAPKAPK3 | MAPKAPK3 | KINASE | 10 | >3   | <5.52 |
| MAPKAPK5 | MAPKAPK5 | KINASE | 11 | >3   | <5.52 |
| MAPKAPK5 | MAPKAPK5 | KINASE | 11 | >3   | <5.52 |
| MARK1    | MARK1    | KINASE | 24 | >3   | <5.52 |
| MARK1    | MARK1    | KINASE | 26 | >3   | <5.52 |
| MARK2    | MARK2    | KINASE | 55 | >3   | <5.52 |
| MARK2    | MARK2    | KINASE | 55 | >3   | <5.52 |
| MARK3    | MARK3    | KINASE | 44 | >3   | <5.52 |
| MARK3    | MARK3    | KINASE | 42 | >3   | <5.52 |
| MARK4    | MARK4    | KINASE | 26 | >3   | <5.52 |
| MARK4    | MARK4    | KINASE | 27 | >3   | <5.52 |
| MAST1    | MAST1    | KINASE | 2  | >3   | <5.52 |
| MAST1    | MAST1    | KINASE | 2  | >3   | <5.52 |
| MAST2    | MAST2    | KINASE | 11 | >3   | <5.52 |
| MAST2    | MAST2    | KINASE | 12 | >3   | <5.52 |
| MAST3    | MAST3    | KINASE | 27 | >3   | <5.52 |
| MAST3    | MAST3    | KINASE | 23 | >3   | <5.52 |
| MASTL    | MASTL    | KINASE | 14 | >3   | <5.52 |
| MASTL    | MASTL    | KINASE | 19 | >3   | <5.52 |
| MELK     | MELK     | KINASE | 35 | >3   | <5.52 |
| MELK     | MELK     | KINASE | 42 | >3   | <5.52 |

|       |          |        |     |     |       |
|-------|----------|--------|-----|-----|-------|
| MERTK | MER      | KINASE | 32  | >3  | <5.52 |
| MERTK | MER      | KINASE | 28  | >3  | <5.52 |
| MET   | MET      | KINASE | 47  | >3  | <5.52 |
| MET   | MET      | KINASE | 44  | >3  | <5.52 |
| MINK1 | ZC3/MINK | KINASE | 37  | >3  | <5.52 |
| MINK1 | ZC3/MINK | KINASE | 35  | >3  | <5.52 |
| MKNK1 | MNK1     | KINASE | 11  | >3  | <5.52 |
| MKNK1 | MNK1     | KINASE | 11  | >3  | <5.52 |
| MKNK2 | MNK2     | KINASE | 11  | >3  | <5.52 |
| MKNK2 | MNK2     | KINASE | 11  | >3  | <5.52 |
| MST1R | RON      | KINASE | 10  | >3  | <5.52 |
| MST1R | RON      | KINASE | 15  | >3  | <5.52 |
| mTOR  | FRAP     | KINASE | 71  | >3  | <5.52 |
| mTOR  | FRAP     | KINASE | 134 | >3  | <5.52 |
| mTOR  | FRAP     | KINASE | 63  | >3  | <5.52 |
| mTOR  | FRAP     | KINASE | 103 | >3  | <5.52 |
| MYLK  | smMLCK   | KINASE | 54  | >3  | <5.52 |
| MYLK  | smMLCK   | KINASE | 44  | >3  | <5.52 |
| MYLK3 | CaMLCK   | KINASE | 21  | >3  | <5.52 |
| MYLK3 | CaMLCK   | KINASE | 18  | >3  | <5.52 |
| NEK1  | NEK1     | KINASE | 47  | >3  | <5.52 |
| NEK1  | NEK1     | KINASE | 49  | >3  | <5.52 |
| NEK11 | NEK11    | KINASE | 2   | >3  | <5.52 |
| NEK11 | NEK11    | KINASE | 4   | >3  | <5.52 |
| NEK2  | NEK2     | KINASE | 30  | >3  | <5.52 |
| NEK2  | NEK2     | KINASE | 27  | >3  | <5.52 |
| NEK3  | NEK3     | KINASE | 16  | >3  | <5.52 |
| NEK3  | NEK3     | KINASE | 14  | >3  | <5.52 |
| NEK6  | NEK6     | KINASE | 11  | >3  | <5.52 |
| NEK6  | NEK6     | KINASE | 16  | >3  | <5.52 |
| NEK7  | NEK7     | KINASE | 13  | >3  | <5.52 |
| NEK7  | NEK7     | KINASE | 17  | >3  | <5.52 |
| NEK9  | NEK9     | KINASE | 69  | >3  | <5.52 |
| NEK9  | NEK9     | KINASE | 66  | >3  | <5.52 |
| NLK   | NLK      | KINASE | 17  | >3  | <5.52 |
| NLK   | NLK      | KINASE | 18  | >3  | <5.52 |
| NRK   | ZC4/NRK  | KINASE | 9   | >3  | <5.52 |
| NRK   | ZC4/NRK  | KINASE | 7   | >3  | <5.52 |
| NTRK1 | TRKA     | KINASE | 20  | >3  | <5.52 |
| NTRK1 | TRKA     | KINASE | 19  | >3  | <5.52 |
| NUAK1 | NuaK1    | KINASE | 8   | 1.7 | 5.77  |
| NUAK1 | NuaK1    | KINASE | 15  | 2.7 | 5.57  |
| OXSR1 | OSR1     | KINASE | 19  | >3  | <5.52 |

|         |                                   |                  |    |    |       |
|---------|-----------------------------------|------------------|----|----|-------|
| OXSRI   | OSR1                              | KINASE           | 17 | >3 | <5.52 |
| PAK2    | PAK2                              | KINASE           | 5  | >3 | <5.52 |
| PAK4    | PAK4                              | KINASE           | 28 | >3 | <5.52 |
| PAK4    | PAK4                              | KINASE           | 35 | >3 | <5.52 |
| PAK6    | PAK6                              | KINASE           | 6  | >3 | <5.52 |
| PAK6    | PAK6                              | KINASE           | 6  | >3 | <5.52 |
| PASK    | PASK                              | KINASE           | 2  | >3 | <5.52 |
| PBK     | PBK                               | KINASE           | 3  | >3 | <5.52 |
| PCTK1   | PCTAIRE1                          | KINASE           | 31 | >3 | <5.52 |
| PCTK1   | PCTAIRE1                          | KINASE           | 26 | >3 | <5.52 |
| PCTK2   | PCTAIRE2                          | KINASE           | 24 | >3 | <5.52 |
| PCTK2   | PCTAIRE2                          | KINASE           | 25 | >3 | <5.52 |
| PCTK3   | PCTAIRE3                          | KINASE           | 20 | >3 | <5.52 |
| PCTK3   | PCTAIRE3                          | KINASE           | 19 | >3 | <5.52 |
| PDGFRA  | PDGFRa                            | KINASE           | 14 | >3 | <5.52 |
| PDGFRA  | PDGFRa                            | KINASE           | 10 | >3 | <5.52 |
| PDGFRB  | PDGFRb                            | KINASE           | 26 | >3 | <5.52 |
| PDGFRB  | PDGFRb                            | KINASE           | 23 | >3 | <5.52 |
| PDIK1L  | CLIK1L                            | KINASE           | 6  | >3 | <5.52 |
| PDIK1L  | CLIK1L                            | KINASE           | 9  | >3 | <5.52 |
| PDK2    | PDHK2                             | KINASE           | 2  | >3 | <5.52 |
| PDPK1   | PDK1                              | KINASE           | 28 | >3 | <5.52 |
| PDPK1   | PDK1                              | KINASE           | 32 | >3 | <5.52 |
| PFTK1   | PFTAIRE1                          | KINASE           | 6  | >3 | <5.52 |
| PFTK1   | PFTAIRE1                          | KINASE           | 10 | >3 | <5.52 |
| PHKG2   | PHKg2                             | KINASE           | 19 | >3 | <5.52 |
| PHKG2   | PHKg2                             | KINASE           | 18 | >3 | <5.52 |
| PI4K2B  | PIK4C2B                           | KINASE           | 3  | >3 | <5.52 |
| PI4K2B  | PIK4C2B                           | KINASE           | 7  | >3 | <5.52 |
| PI4K2B  | PIK4C2B                           | KINASE           | 6  | >3 | <5.52 |
| PI4KA   | PIK4Ca                            | KINASE           | 17 | >3 | <5.52 |
| PI4KA   | PIK4Ca                            | KINASE           | 52 | >3 | <5.52 |
| PI4KA   | PIK4Ca                            | KINASE           | 5  | >3 | <5.52 |
| PI4KA   | PIK4Ca                            | KINASE           | 10 | >3 | <5.52 |
| PI4KA   | PIK4Ca                            | KINASE           | 49 | >3 | <5.52 |
| PI4KA   | PIK4Ca                            | KINASE           | 5  | >3 | <5.52 |
| PI4KB   | PIK4Cb                            | KINASE           | 17 | >3 | <5.52 |
| PI4KB   | PIK4Cb                            | KINASE           | 21 | >3 | <5.52 |
| PIK3C2A | PIK3C2a                           | KINASE           | 41 | >3 | <5.52 |
| PIK3C2A | PIK3C2a                           | KINASE           | 25 | >3 | <5.52 |
| PIK3C2B | complement component C2a, PIK3C2b | PROTEASE, KINASE | 18 | >3 | <5.52 |
| PIK3C2B | PIK3C2b                           | KINASE           | 72 | >3 | <5.52 |
| PIK3C2B | PIK3C2b                           | KINASE           | 30 | >3 | <5.52 |

|         |                                  |                  |     |       |       |
|---------|----------------------------------|------------------|-----|-------|-------|
| PIK3C2B | PIK3C2b                          | KINASE           | 66  | >3    | <5.52 |
| PIK3C3  | complement component C2a, PIK3C3 | PROTEASE, KINASE | 26  | >3    | <5.52 |
| PIK3C3  | PIK3C3                           | KINASE           | 60  | >3    | <5.52 |
| PIK3C3  | PIK3C3                           | KINASE           | 27  | >3    | <5.52 |
| PIK3C3  | PIK3C3                           | KINASE           | 52  | >3    | <5.52 |
| PIK3CA  | PIK3Ca                           | KINASE           | 65  | >3    | <5.52 |
| PIK3CA  | PIK3Ca                           | KINASE           | 65  | >3    | <5.52 |
| PIK3CB  | PIK3Cb                           | KINASE           | 4   | >3    | <5.52 |
| PIK3CB  | PIK3Cb                           | KINASE           | 56  | >3    | <5.52 |
| PIK3CB  | PIK3Cb                           | KINASE           | 5   | >3    | <5.52 |
| PIK3CB  | PIK3Cb                           | KINASE           | 47  | >3    | <5.52 |
| PIK3CD  | PIK3Cd                           | KINASE           | 65  | >3    | <5.52 |
| PIK3CD  | PIK3Cd                           | KINASE           | 51  | >3    | <5.52 |
| PIK3CG  | PIK3Cg                           | KINASE           | 65  | >3    | <5.52 |
| PIK3CG  | PIK3Cg                           | KINASE           | 48  | >3    | <5.52 |
| PIK3R4  | PIK3R4                           | KINASE           | 25  | >3    | <5.52 |
| PIK3R4  | PIK3R4                           | KINASE           | 73  | >3    | <5.52 |
| PIK3R4  | PIK3R4                           | KINASE           | 22  | >3    | <5.52 |
| PIK3R4  | PIK3R4                           | KINASE           | 67  | >3    | <5.52 |
| PIM1    | PIM1                             | KINASE           | 15  | >3    | <5.52 |
| PIM1    | PIM1                             | KINASE           | 6   | >3    | <5.52 |
| PIM1    | PIM1                             | KINASE           | 18  | >3    | <5.52 |
| PIM1    | PIM1                             | KINASE           | 5   | >3    | <5.52 |
| PIM2    | PIM2                             | KINASE           | 12  | >3    | <5.52 |
| PIM2    | PIM2                             | KINASE           | 12  | >3    | <5.52 |
| PIM3    | PIM3                             | KINASE           | 7   | >3    | <5.52 |
| PIM3    | PIM3                             | KINASE           | 8   | >3    | <5.52 |
| PIP4K2A | PIP5K2A                          | KINASE           | 17  | 0.097 | 7.01  |
| PIP4K2A | PIP5K2A                          | KINASE           | 11  | 0.13  | 6.89  |
| PIP4K2B | PIP5K2B                          | KINASE           | 12  | 0.062 | 7.21  |
| PIP4K2B | PIP5K2B                          | KINASE           | 15  | 0.14  | 6.85  |
| PIP4K2C | PIP5K2C                          | KINASE           | 30  | 0.11  | 6.96  |
| PIP4K2C | PIP5K2C                          | KINASE           | 25  | 0.16  | 6.80  |
| PIP5K3  | PIP5K3                           | KINASE           | 88  | >3    | <5.52 |
| PIP5K3  | PIP5K3                           | KINASE           | 61  | >3    | <5.52 |
| PIP5K3  | PIP5K3                           | KINASE           | 100 | >3    | <5.52 |
| PIP5K3  | PIP5K3                           | KINASE           | 45  | >3    | <5.52 |
| PKMYT1  | MYT1                             | KINASE           | 18  | >3    | <5.52 |
| PKMYT1  | MYT1                             | KINASE           | 20  | >3    | <5.52 |
| PKN1    | complement component C2a, PKN1   | PROTEASE, KINASE | 19  | >3    | <5.52 |
| PKN1    | PKN1                             | KINASE           | 35  | >3    | <5.52 |
| PKN2    | complement component C2a, PKN2   | PROTEASE, KINASE | 27  | >3    | <5.52 |
| PKN2    | PKN2                             | KINASE           | 36  | >3    | <5.52 |

|        |                                |                  |     |    |       |
|--------|--------------------------------|------------------|-----|----|-------|
| PKN3   | complement component C2a, PKN3 | PROTEASE, KINASE | 26  | >3 | <5.52 |
| PKN3   | PKN3                           | KINASE           | 26  | >3 | <5.52 |
| PLK1   | PLK1                           | KINASE           | 19  | >3 | <5.52 |
| PLK1   | PLK1                           | KINASE           | 25  | >3 | <5.52 |
| PLK2   | PLK2                           | KINASE           | 4   | >3 | <5.52 |
| PLK2   | PLK2                           | KINASE           | 4   | >3 | <5.52 |
| PLK4   | PLK4                           | KINASE           | 24  | >3 | <5.52 |
| PLK4   | PLK4                           | KINASE           | 24  | >3 | <5.52 |
| PRKAA1 | AMPKa1                         | KINASE           | 42  | >3 | <5.52 |
| PRKAA1 | AMPKa1                         | KINASE           | 48  | >3 | <5.52 |
| PRKAA2 | AMPKa2                         | KINASE           | 21  | >3 | <5.52 |
| PRKAA2 | AMPKa2                         | KINASE           | 25  | >3 | <5.52 |
| PRKACA | PKACa                          | KINASE           | 6   | >3 | <5.52 |
| PRKACA | PKACa                          | KINASE           | 3   | >3 | <5.52 |
| PRKACB | PKACb, SgK494                  | KINASE           | 5   | >3 | <5.52 |
| PRKACB | PKACb, SgK494                  | KINASE           | 4   | >3 | <5.52 |
| PRKCA  | complement component C2a, PKCa | PROTEASE, KINASE | 28  | >3 | <5.52 |
| PRKCA  | PKCa                           | KINASE           | 30  | >3 | <5.52 |
| PRKCB  | complement component C2a, PKCb | PROTEASE, KINASE | 28  | >3 | <5.52 |
| PRKCB  | PKCb                           | KINASE           | 32  | >3 | <5.52 |
| PRKCD  | complement component C2a, PKCd | PROTEASE, KINASE | 37  | >3 | <5.52 |
| PRKCD  | PKCd                           | KINASE           | 48  | >3 | <5.52 |
| PRKCE  | complement component C2a, PKCe | PROTEASE, KINASE | 4   | >3 | <5.52 |
| PRKCE  | PKCe                           | KINASE           | 5   | >3 | <5.52 |
| PRKCI  | PKCi                           | KINASE           | 7   | >3 | <5.52 |
| PRKCI  | PKCi                           | KINASE           | 11  | >3 | <5.52 |
| PRKCQ  | PKCt                           | KINASE           | 43  | >3 | <5.52 |
| PRKCQ  | PKCt                           | KINASE           | 48  | >3 | <5.52 |
| PRKCZ  | PKCz                           | KINASE           | 8   | >3 | <5.52 |
| PRKCZ  | PKCz                           | KINASE           | 6   | >3 | <5.52 |
| PRKD1  | PKD1                           | KINASE           | 19  | >3 | <5.52 |
| PRKD1  | PKD1                           | KINASE           | 20  | >3 | <5.52 |
| PRKD2  | PKD2                           | KINASE           | 31  | >3 | <5.52 |
| PRKD2  | PKD2                           | KINASE           | 32  | >3 | <5.52 |
| PRKD3  | PKD3                           | KINASE           | 24  | >3 | <5.52 |
| PRKD3  | PKD3                           | KINASE           | 24  | >3 | <5.52 |
| PRKDC  | DNAPK                          | KINASE           | 236 | >3 | <5.52 |
| PRKDC  | DNAPK                          | KINASE           | 311 | >3 | <5.52 |
| PRKDC  | DNAPK                          | KINASE           | 229 | >3 | <5.52 |
| PRKDC  | DNAPK                          | KINASE           | 320 | >3 | <5.52 |
| PRKG1  | PKG1                           | KINASE           | 49  | >3 | <5.52 |
| PRKG1  | PKG1                           | KINASE           | 47  | >3 | <5.52 |
| PRKX   | PRKX                           | KINASE           | 12  | >3 | <5.52 |

|              |        |        |    |      |       |
|--------------|--------|--------|----|------|-------|
| PRKX         | PRKX   | KINASE | 16 | >3   | <5.52 |
| PTK2         | FAK    | KINASE | 86 | >3   | <5.52 |
| PTK2         | FAK    | KINASE | 87 | >3   | <5.52 |
| PTK2B        | PYK2   | KINASE | 84 | >3   | <5.52 |
| PTK2B        | PYK2   | KINASE | 95 | >3   | <5.52 |
| PTK6         | BRK    | KINASE | 4  | >3   | <5.52 |
| PTK7         | CCK4   | KINASE | 2  | >3   | <5.52 |
| RAF1         | RAF1   | KINASE | 5  | >3   | <5.52 |
| RAF1         | RAF1   | KINASE | 7  | >3   | <5.52 |
| RIOK1        | RIOK1  | KINASE | 2  | >3   | <5.52 |
| RIOK2        | RIOK2  | KINASE | 4  | 0.73 | 6.14  |
| RIOK2        | RIOK2  | KINASE | 4  | 0.81 | 6.09  |
| RIOK2        | RIOK2  | KINASE | 39 | 1.8  | 5.74  |
| RIOK2        | RIOK2  | KINASE | 35 | >3   | <5.52 |
| RIPK1        | RIPK1  | KINASE | 8  | >3   | <5.52 |
| RIPK1        | RIPK1  | KINASE | 11 | >3   | <5.52 |
| RIPK2        | RIPK2  | KINASE | 29 | >3   | <5.52 |
| RIPK2        | RIPK2  | KINASE | 17 | >3   | <5.52 |
| RIPK2        | RIPK2  | KINASE | 29 | >3   | <5.52 |
| RIPK2        | RIPK2  | KINASE | 11 | >3   | <5.52 |
| RIPK3        | RIPK3  | KINASE | 7  | >3   | <5.52 |
| RIPK3        | RIPK3  | KINASE | 8  | >3   | <5.52 |
| RIPK4        | ANKRD3 | KINASE | 14 | >3   | <5.52 |
| RIPK4        | ANKRD3 | KINASE | 10 | >3   | <5.52 |
| RNASEL       | RNAseL | KINASE | 11 | >3   | <5.52 |
| RNASEL       | RNAseL | KINASE | 16 | >3   | <5.52 |
| ROCK1        | ROCK1  | KINASE | 5  | >3   | <5.52 |
| ROCK1        | ROCK1  | KINASE | 6  | >3   | <5.52 |
| ROCK2        | ROCK2  | KINASE | 27 | >3   | <5.52 |
| ROCK2        | ROCK2  | KINASE | 26 | >3   | <5.52 |
| RP6-213H19 1 | MST4   | KINASE | 6  | >3   | <5.52 |
| RP6-213H19 1 | MST4   | KINASE | 7  | >3   | <5.52 |
| RPS6KA1      | RSK3   | KINASE | 38 | >3   | <5.52 |
| RPS6KA1      | RSK3   | KINASE | 39 | >3   | <5.52 |
| RPS6KA2      | RSK1   | KINASE | 15 | >3   | <5.52 |
| RPS6KA2      | RSK1   | KINASE | 13 | >3   | <5.52 |
| RPS6KA3      | RSK2   | KINASE | 38 | >3   | <5.52 |
| RPS6KA3      | RSK2   | KINASE | 39 | >3   | <5.52 |
| RPS6KA4      | MSK2   | KINASE | 41 | >3   | <5.52 |
| RPS6KA4      | MSK2   | KINASE | 42 | >3   | <5.52 |
| RPS6KA5      | MSK1   | KINASE | 38 | 1.5  | 5.82  |
| RPS6KA5      | MSK1   | KINASE | 38 | 2.5  | 5.60  |
| RPS6KA6      | RSK4   | KINASE | 21 | >3   | <5.52 |

|         |                |        |    |    |       |
|---------|----------------|--------|----|----|-------|
| RPS6KA6 | RSK4           | KINASE | 14 | >3 | <5.52 |
| RPS6KB1 | p70S6K         | KINASE | 11 | >3 | <5.52 |
| RPS6KB1 | p70S6K         | KINASE | 14 | >3 | <5.52 |
| RPS6KC1 | RSKL1          | KINASE | 2  | >3 | <5.52 |
| SBK2    | SgK069, SgK110 | KINASE | 2  | >3 | <5.52 |
| SCYL1   | SCYL1          | KINASE | 2  | >3 | <5.52 |
| SGK1    | SGK1           | KINASE | 4  | >3 | <5.52 |
| SGK1    | SGK1           | KINASE | 4  | >3 | <5.52 |
| SGK3    | SGK3           | KINASE | 14 | >3 | <5.52 |
| SGK3    | SGK3           | KINASE | 13 | >3 | <5.52 |
| SIK1    | SIK            | KINASE | 4  | >3 | <5.52 |
| SIK1    | SIK            | KINASE | 6  | >3 | <5.52 |
| SIK2    | QIK            | KINASE | 43 | >3 | <5.52 |
| SIK2    | QIK            | KINASE | 39 | >3 | <5.52 |
| SLK     | SLK            | KINASE | 97 | >3 | <5.52 |
| SLK     | SLK            | KINASE | 99 | >3 | <5.52 |
| SMG1    | SMG1           | KINASE | 2  | >3 | <5.52 |
| SMG1    | SMG1           | KINASE | 2  | >3 | <5.52 |
| SNRK    | SNRK           | KINASE | 13 | >3 | <5.52 |
| SNRK    | SNRK           | KINASE | 13 | >3 | <5.52 |
| SRC     | SRC            | KINASE | 19 | >3 | <5.52 |
| SRC     | SRC            | KINASE | 24 | >3 | <5.52 |
| STK10   | LOK            | KINASE | 67 | >3 | <5.52 |
| STK10   | LOK            | KINASE | 80 | >3 | <5.52 |
| STK11   | LKB1           | KINASE | 12 | >3 | <5.52 |
| STK11   | LKB1           | KINASE | 14 | >3 | <5.52 |
| STK16   | MPSK1          | KINASE | 14 | >3 | <5.52 |
| STK16   | MPSK1          | KINASE | 16 | >3 | <5.52 |
| STK17A  | DRAK1, SgK085  | KINASE | 8  | >3 | <5.52 |
| STK17A  | DRAK1, SgK085  | KINASE | 11 | >3 | <5.52 |
| STK17B  | DRAK2          | KINASE | 10 | >3 | <5.52 |
| STK17B  | DRAK2          | KINASE | 9  | >3 | <5.52 |
| STK24   | MST3           | KINASE | 2  | >3 | <5.52 |
| STK25   | YSK1           | KINASE | 3  | >3 | <5.52 |
| STK25   | YSK1           | KINASE | 6  | >3 | <5.52 |
| STK3    | MST2           | KINASE | 22 | >3 | <5.52 |
| STK3    | MST2           | KINASE | 18 | >3 | <5.52 |
| STK33   | STK33          | KINASE | 25 | 1  | 6.00  |
| STK33   | STK33          | KINASE | 26 | >3 | <5.52 |
| STK35   | CLIK1          | KINASE | 18 | >3 | <5.52 |
| STK35   | CLIK1          | KINASE | 23 | >3 | <5.52 |
| STK36   | Fused          | KINASE | 5  | >3 | <5.52 |
| STK36   | Fused          | KINASE | 2  | >3 | <5.52 |



|        |          |        |    |    |       |
|--------|----------|--------|----|----|-------|
| STK38  | NDR1     | KINASE | 23 | >3 | <5.52 |
| STK38  | NDR1     | KINASE | 20 | >3 | <5.52 |
| STK38L | NDR2     | KINASE | 15 | >3 | <5.52 |
| STK38L | NDR2     | KINASE | 10 | >3 | <5.52 |
| STK39  | STLK3    | KINASE | 14 | >3 | <5.52 |
| STK39  | STLK3    | KINASE | 14 | >3 | <5.52 |
| STK4   | MST1     | KINASE | 28 | >3 | <5.52 |
| STK4   | MST1     | KINASE | 29 | >3 | <5.52 |
| STRADA | STLK5    | KINASE | 14 | >3 | <5.52 |
| STRADA | STLK5    | KINASE | 13 | >3 | <5.52 |
| STRADB | STLK6    | KINASE | 4  | >3 | <5.52 |
| STRADB | STLK6    | KINASE | 2  | >3 | <5.52 |
| SYK    | SYK      | KINASE | 35 | >3 | <5.52 |
| SYK    | SYK      | KINASE | 36 | >3 | <5.52 |
| TAOK1  | TAO1     | KINASE | 8  | >3 | <5.52 |
| TAOK1  | TAO1     | KINASE | 13 | >3 | <5.52 |
| TAOK2  | TAO2     | KINASE | 15 | >3 | <5.52 |
| TAOK2  | TAO2     | KINASE | 22 | >3 | <5.52 |
| TAOK3  | TAO3     | KINASE | 28 | >3 | <5.52 |
| TAOK3  | TAO3     | KINASE | 36 | >3 | <5.52 |
| TBK1   | TBK1     | KINASE | 59 | >3 | <5.52 |
| TBK1   | TBK1     | KINASE | 60 | >3 | <5.52 |
| TEC    | TEC      | KINASE | 56 | >3 | <5.52 |
| TEC    | TEC      | KINASE | 62 | >3 | <5.52 |
| TEK    | TIE2     | KINASE | 30 | >3 | <5.52 |
| TEK    | TIE2     | KINASE | 28 | >3 | <5.52 |
| TESK1  | TESK1    | KINASE | 15 | >3 | <5.52 |
| TESK1  | TESK1    | KINASE | 12 | >3 | <5.52 |
| TESK2  | TESK2    | KINASE | 20 | >3 | <5.52 |
| TESK2  | TESK2    | KINASE | 18 | >3 | <5.52 |
| TGFBR1 | TGFbR1   | KINASE | 29 | >3 | <5.52 |
| TGFBR1 | TGFbR1   | KINASE | 30 | >3 | <5.52 |
| TGFBR2 | TGFbR2   | KINASE | 23 | >3 | <5.52 |
| TGFBR2 | TGFbR2   | KINASE | 28 | >3 | <5.52 |
| TLK1   | TLK1     | KINASE | 4  | >3 | <5.52 |
| TLK1   | TLK1     | KINASE | 2  | >3 | <5.52 |
| TLK2   | TLK2     | KINASE | 6  | >3 | <5.52 |
| TNIK   | ZC2/TNIK | KINASE | 62 | >3 | <5.52 |
| TNIK   | ZC2/TNIK | KINASE | 62 | >3 | <5.52 |
| TNK1   | TNK1     | KINASE | 30 | >3 | <5.52 |
| TNK1   | TNK1     | KINASE | 30 | >3 | <5.52 |
| TNK2   | ACK      | KINASE | 37 | >3 | <5.52 |
| TNK2   | ACK      | KINASE | 31 | >3 | <5.52 |

|        |               |                    |    |       |       |
|--------|---------------|--------------------|----|-------|-------|
| TP53RK | PRPK          | KINASE             | 13 | 1.4   | 5.85  |
| TP53RK | PRPK          | KINASE             | 14 | 2     | 5.70  |
| TRIM33 | TIF1g, TRIM33 | KINASE, PHD, BROMO | 3  | >3    | <5.52 |
| TRIO   | Trio          | KINASE             | 5  | >3    | <5.52 |
| TRRAP  | TRRAP         | KINASE             | 43 | >3    | <5.52 |
| TRRAP  | TRRAP         | KINASE             | 29 | >3    | <5.52 |
| TRRAP  | TRRAP         | KINASE             | 2  | >3    | <5.52 |
| TTK    | TTK           | KINASE             | 25 | 0.078 | 7.11  |
| TTK    | TTK           | KINASE             | 36 | 0.11  | 6.96  |
| TTN    | TTN           | KINASE             | 5  | >3    | <5.52 |
| TYK2   | TYK2          | KINASE             | 68 | >3    | <5.52 |
| TYK2   | TYK2          | KINASE             | 68 | >3    | <5.52 |
| TYRO3  | TYRO3         | KINASE             | 14 | >3    | <5.52 |
| TYRO3  | TYRO3         | KINASE             | 16 | >3    | <5.52 |
| UHMK1  | KIS           | KINASE             | 4  | >3    | <5.52 |
| UHMK1  | KIS           | KINASE             | 3  | >3    | <5.52 |
| ULK1   | ULK1          | KINASE             | 26 | >3    | <5.52 |
| ULK1   | ULK1          | KINASE             | 27 | >3    | <5.52 |
| ULK2   | ULK2          | KINASE             | 2  | >3    | <5.52 |
| ULK3   | ULK3          | KINASE             | 29 | >3    | <5.52 |
| ULK3   | ULK3          | KINASE             | 34 | >3    | <5.52 |
| WEE1   | Wee1, Wee1B   | KINASE             | 43 | >3    | <5.52 |
| WEE1   | Wee1, Wee1B   | KINASE             | 40 | >3    | <5.52 |
| WNK1   | Wnk1          | KINASE             | 14 | >3    | <5.52 |
| WNK1   | Wnk1          | KINASE             | 12 | >3    | <5.52 |
| WNK4   | Wnk4          | KINASE             | 5  | >3    | <5.52 |
| WNK4   | Wnk4          | KINASE             | 3  | >3    | <5.52 |
| YES1   | YES           | KINASE             | 25 | >3    | <5.52 |
| YES1   | YES           | KINASE             | 24 | >3    | <5.52 |
| ZAK    | ZAK           | KINASE             | 28 | >3    | <5.52 |
| ZAK    | ZAK           | KINASE             | 29 | >3    | <5.52 |

## References

1. S.J. Shaw, D.A. Goff, L.A. Boralsky, M. Irving, R. Singh. Enantioselective Synthesis of cis-3-Fluoropiperidin-4-ol, a Building Block for Medicinal Chemistry. *J. Org. Chem.*, 2013, **78**, 8892-8897. <https://doi.org/10.1021/jo401352z>
2. M. Bantscheff, D. Eberhard, Y. Abraham, *et al.* Quantitative chemical proteomics reveals mechanisms of action of clinical ABL kinase inhibitors. *Nat. Biotechnol.* 2007, **25**, 1035-1044. <https://doi.org/10.1038/nbt1328>.
3. T. Werner, G. Sweetman, M.F. Savitski, T. Mathieson, M. Bantscheff, M. Savitski. Ion Coalescence of Neutron Encoded TMT 10-Plex Reporter Ions. *Anal. Chem.* 2014; 86: 3594–3601. <https://doi.org/10.1021/ac500140s>.
